# Supplementary material for: Analyses of the Stability and Core Taxonomic Memberships of the Human Microbiome
Source: PubMed Central journal article supplement (PMC3646044; doi:10.1371/journal.pone.0063139), 2013-05-06

# v35.Taxa.Anterior\_nares.cdf

Log<sub>10</sub>(Abundance)

-4 -3 -2 -1 0

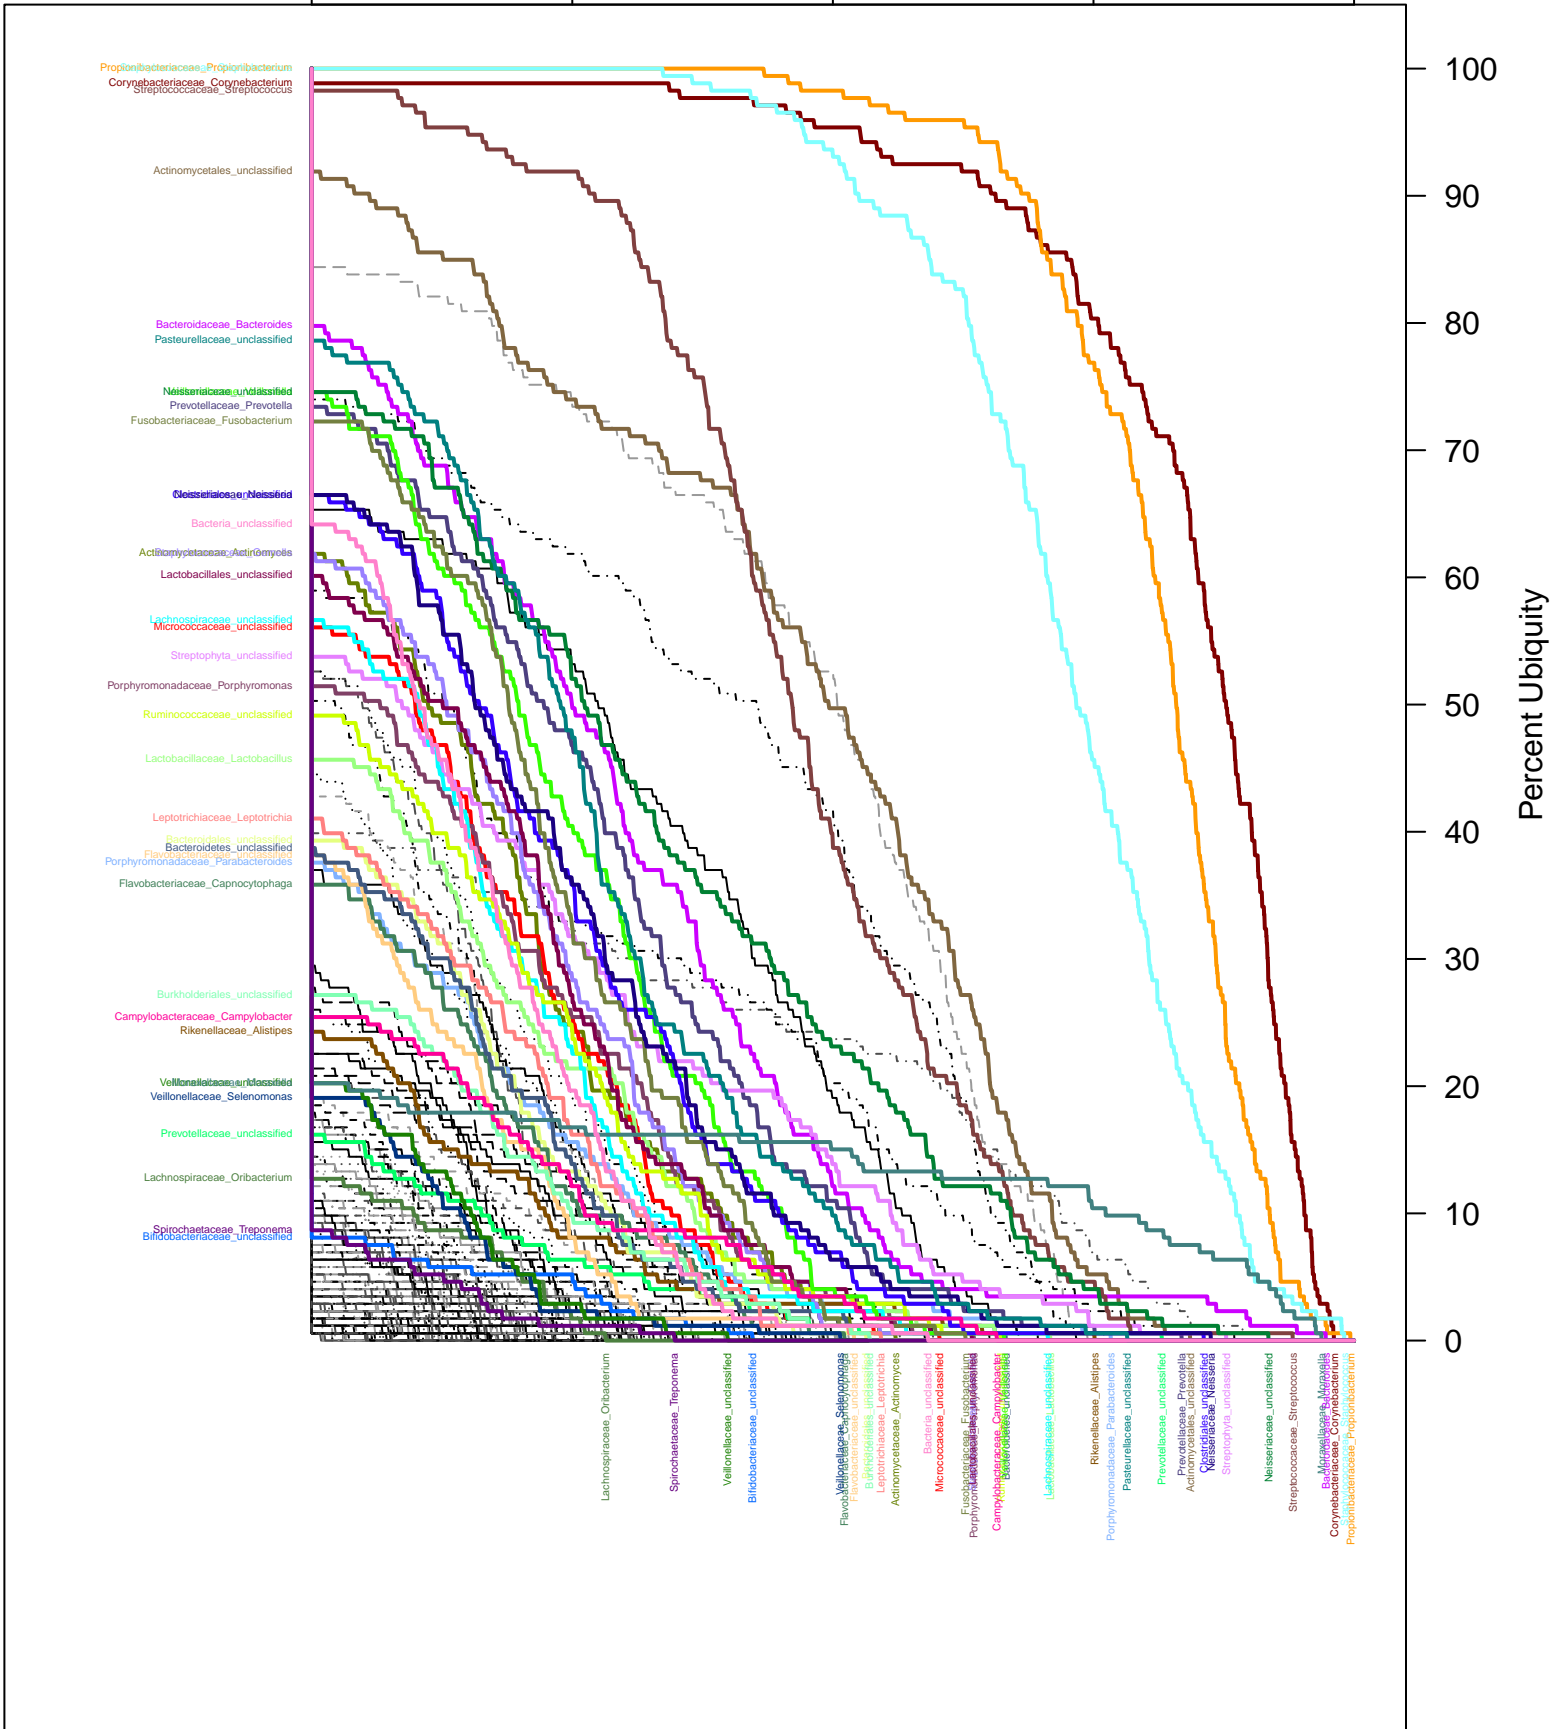

# v35.Taxa.Buccal\_mucosa.cdf

Log<sub>10</sub>(Abundance)

-4 -3 -2 -1 0

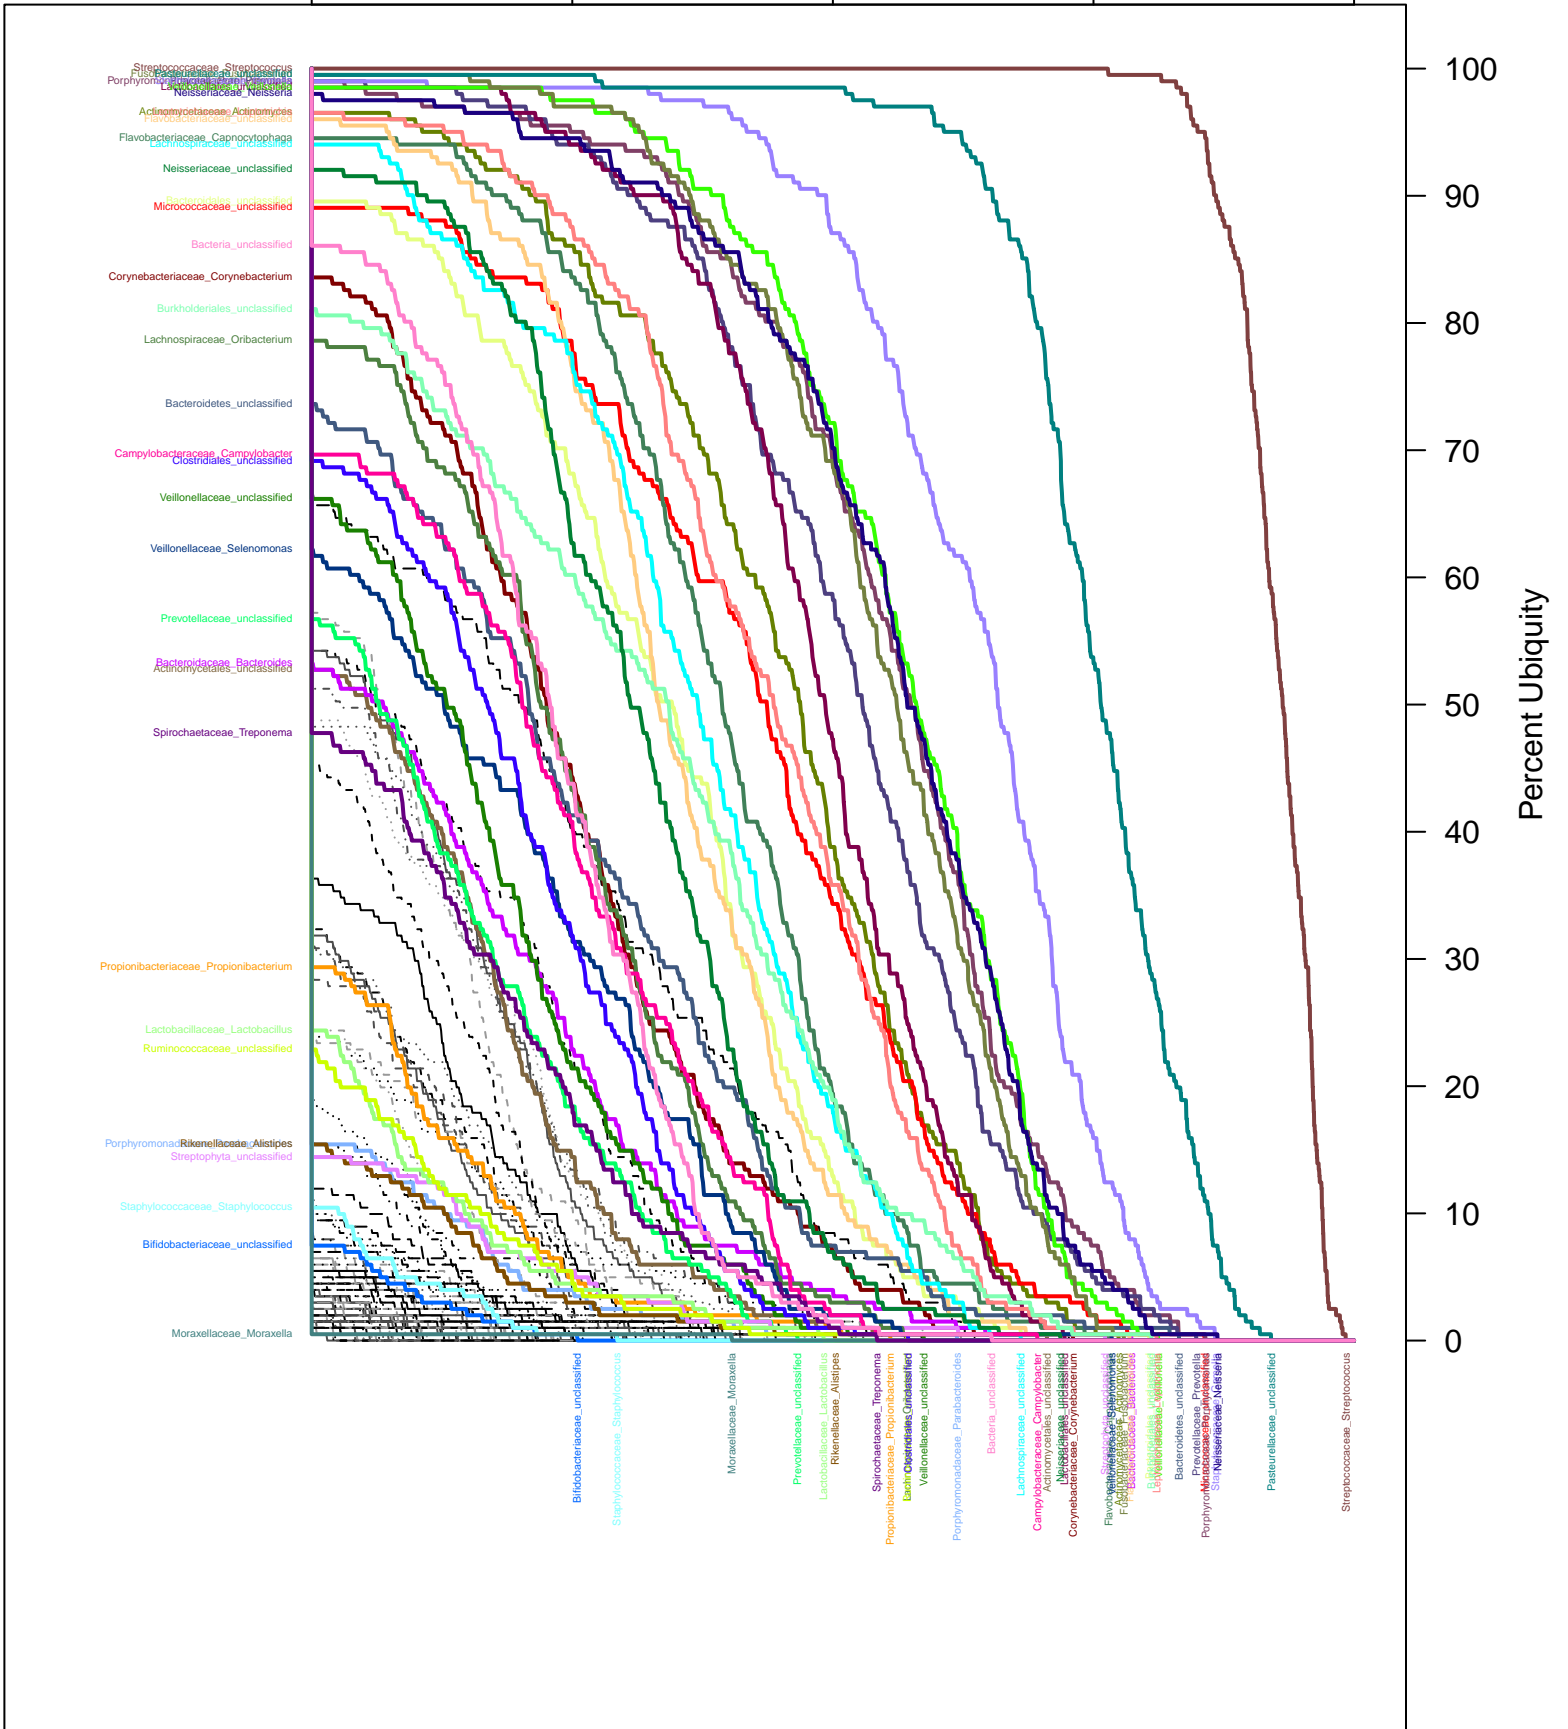

# v35.Taxa.Hard\_palate.cdf

Log<sub>10</sub>(Abundance)

-4 -3 -2 -1 0

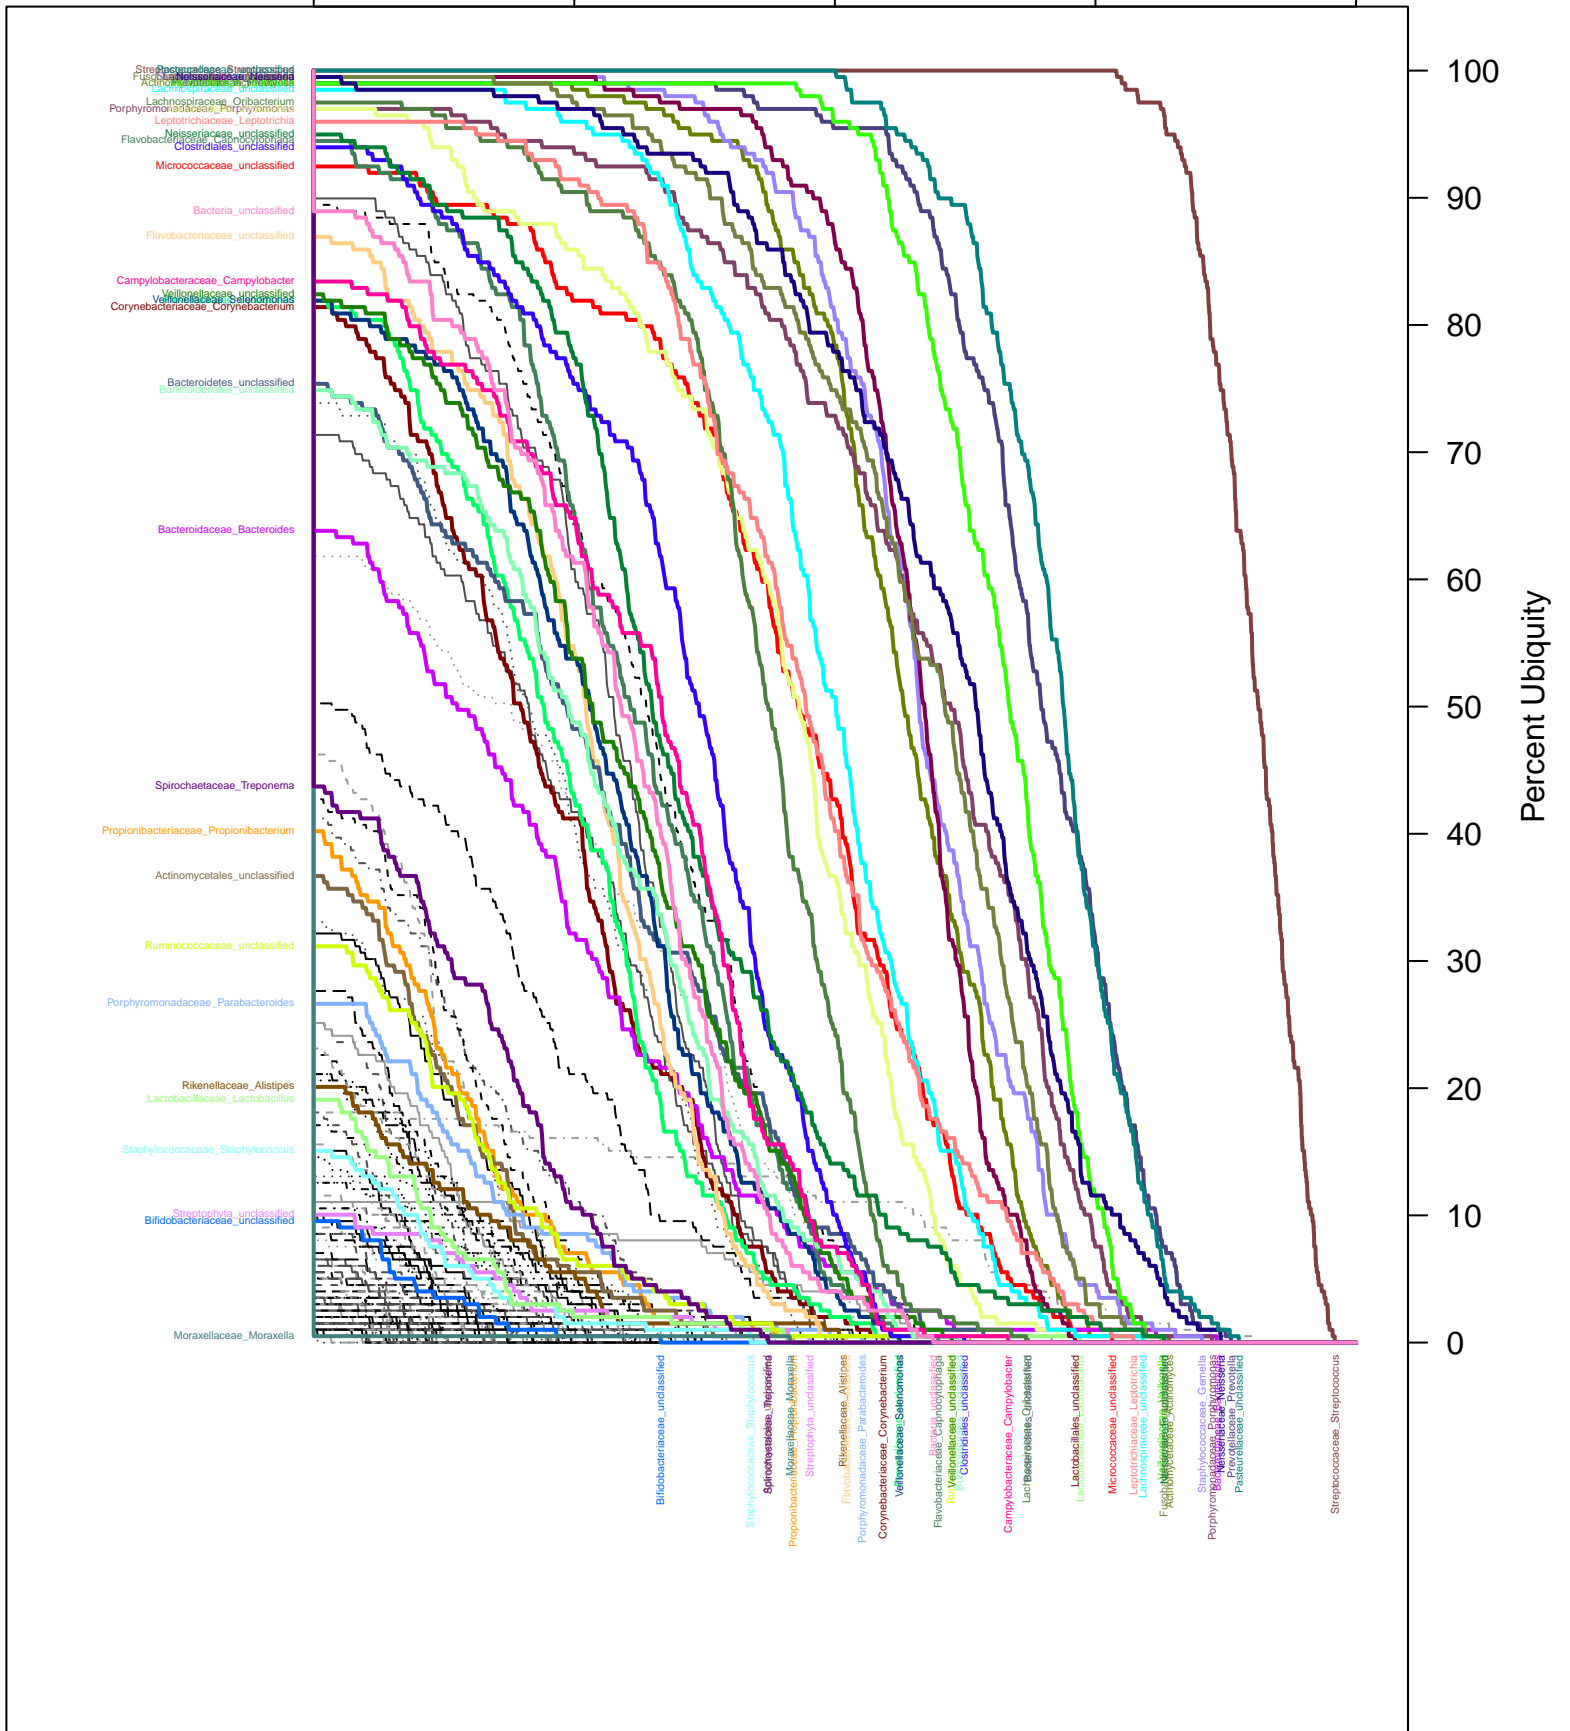

# v35.Taxa.Keratinized\_gingiva.cdf

Log<sub>10</sub>(Abundance)

-4                      -3                      -2                      -1                      0

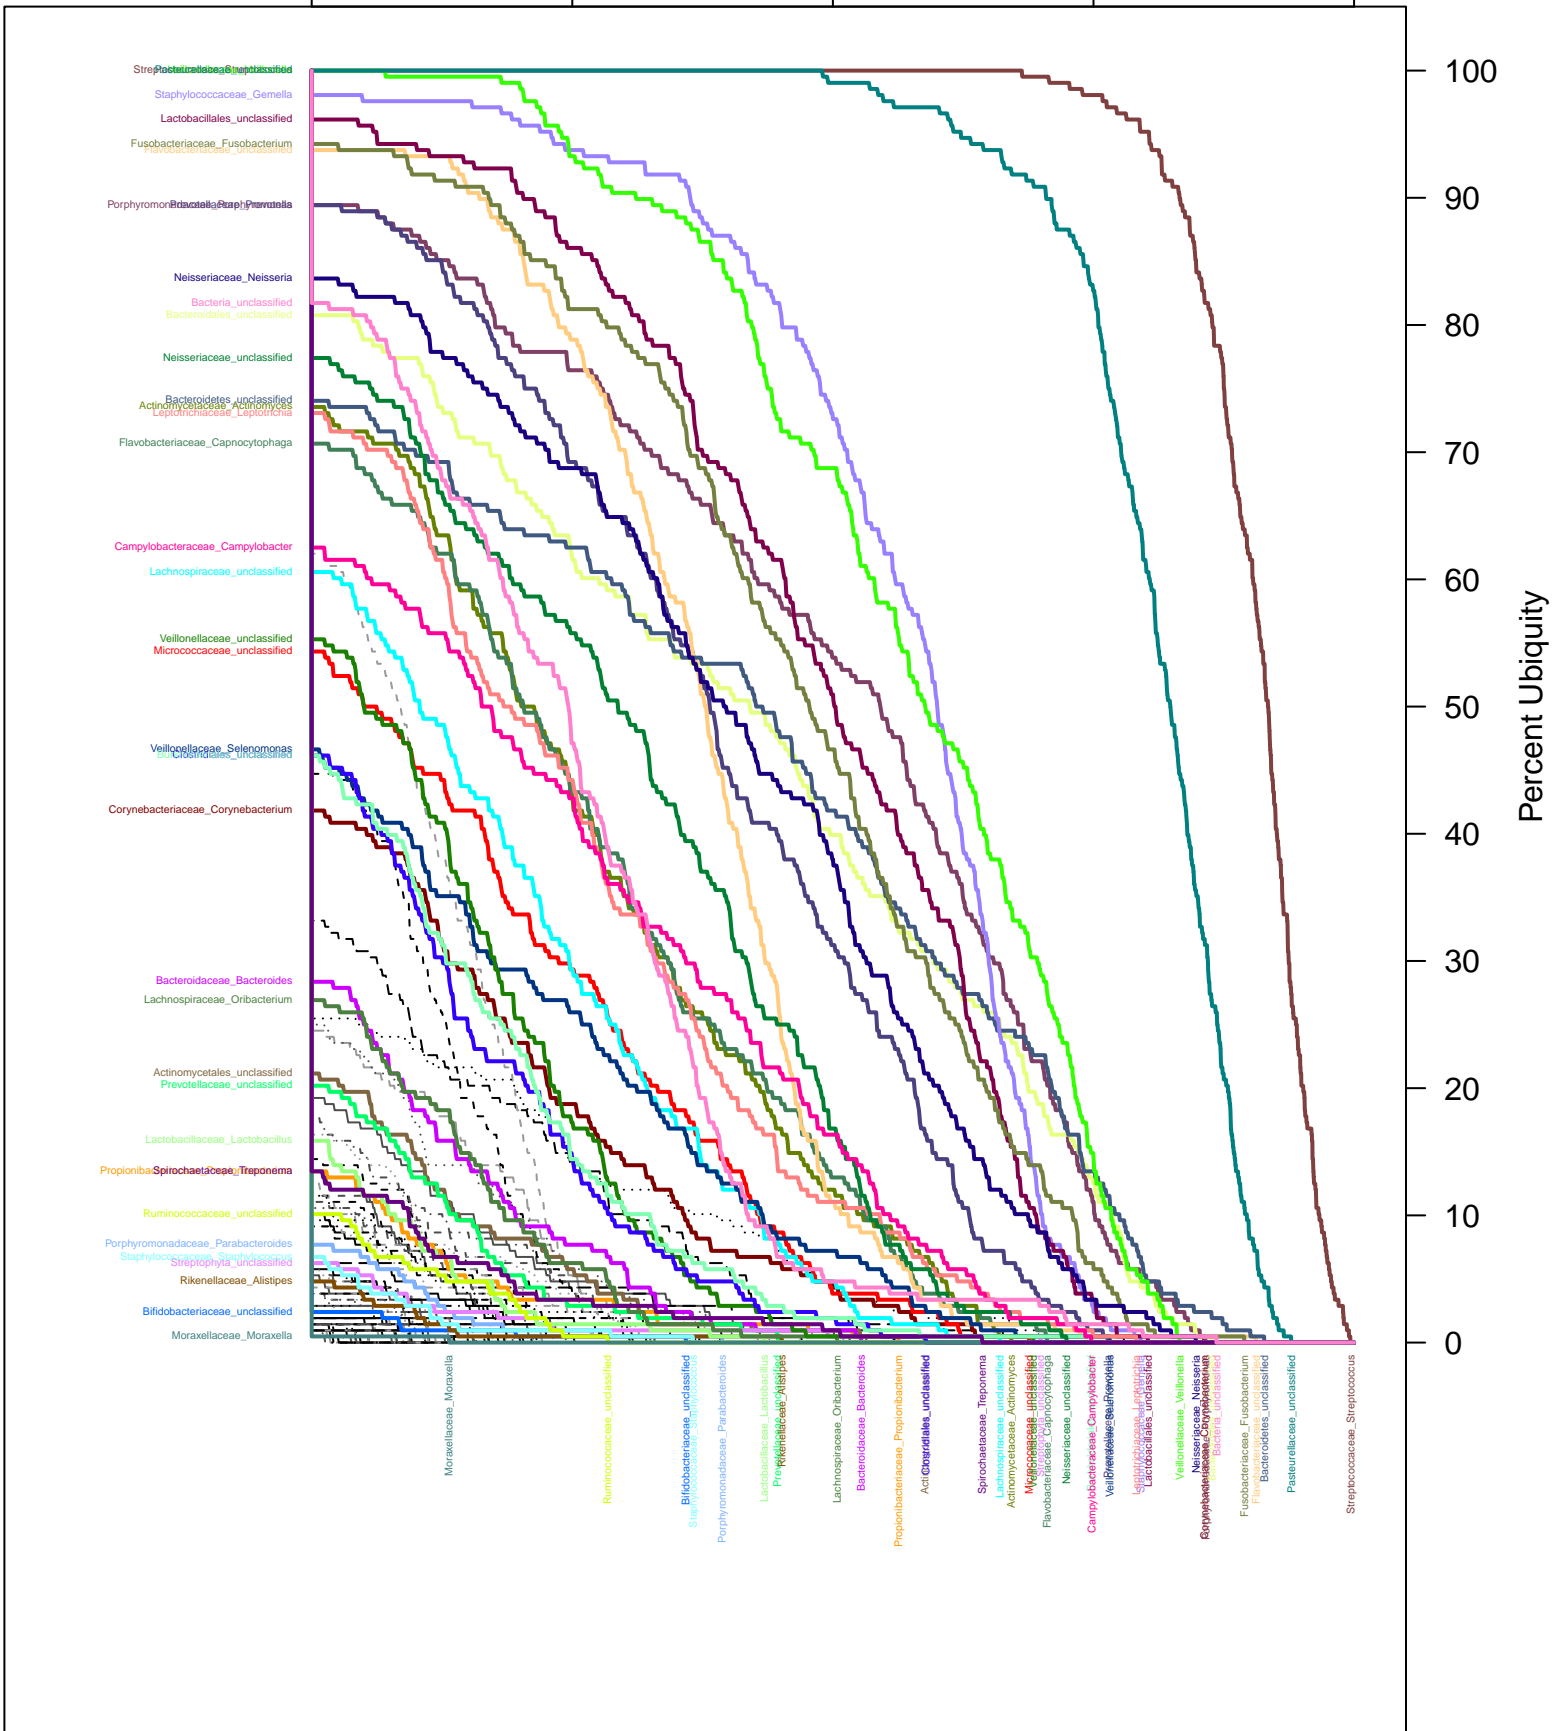

# v35.Taxa.L\_Antecubital\_fossa.cdf

Log<sub>10</sub>(Abundance)

-4                      -3                      -2                      -1                      0

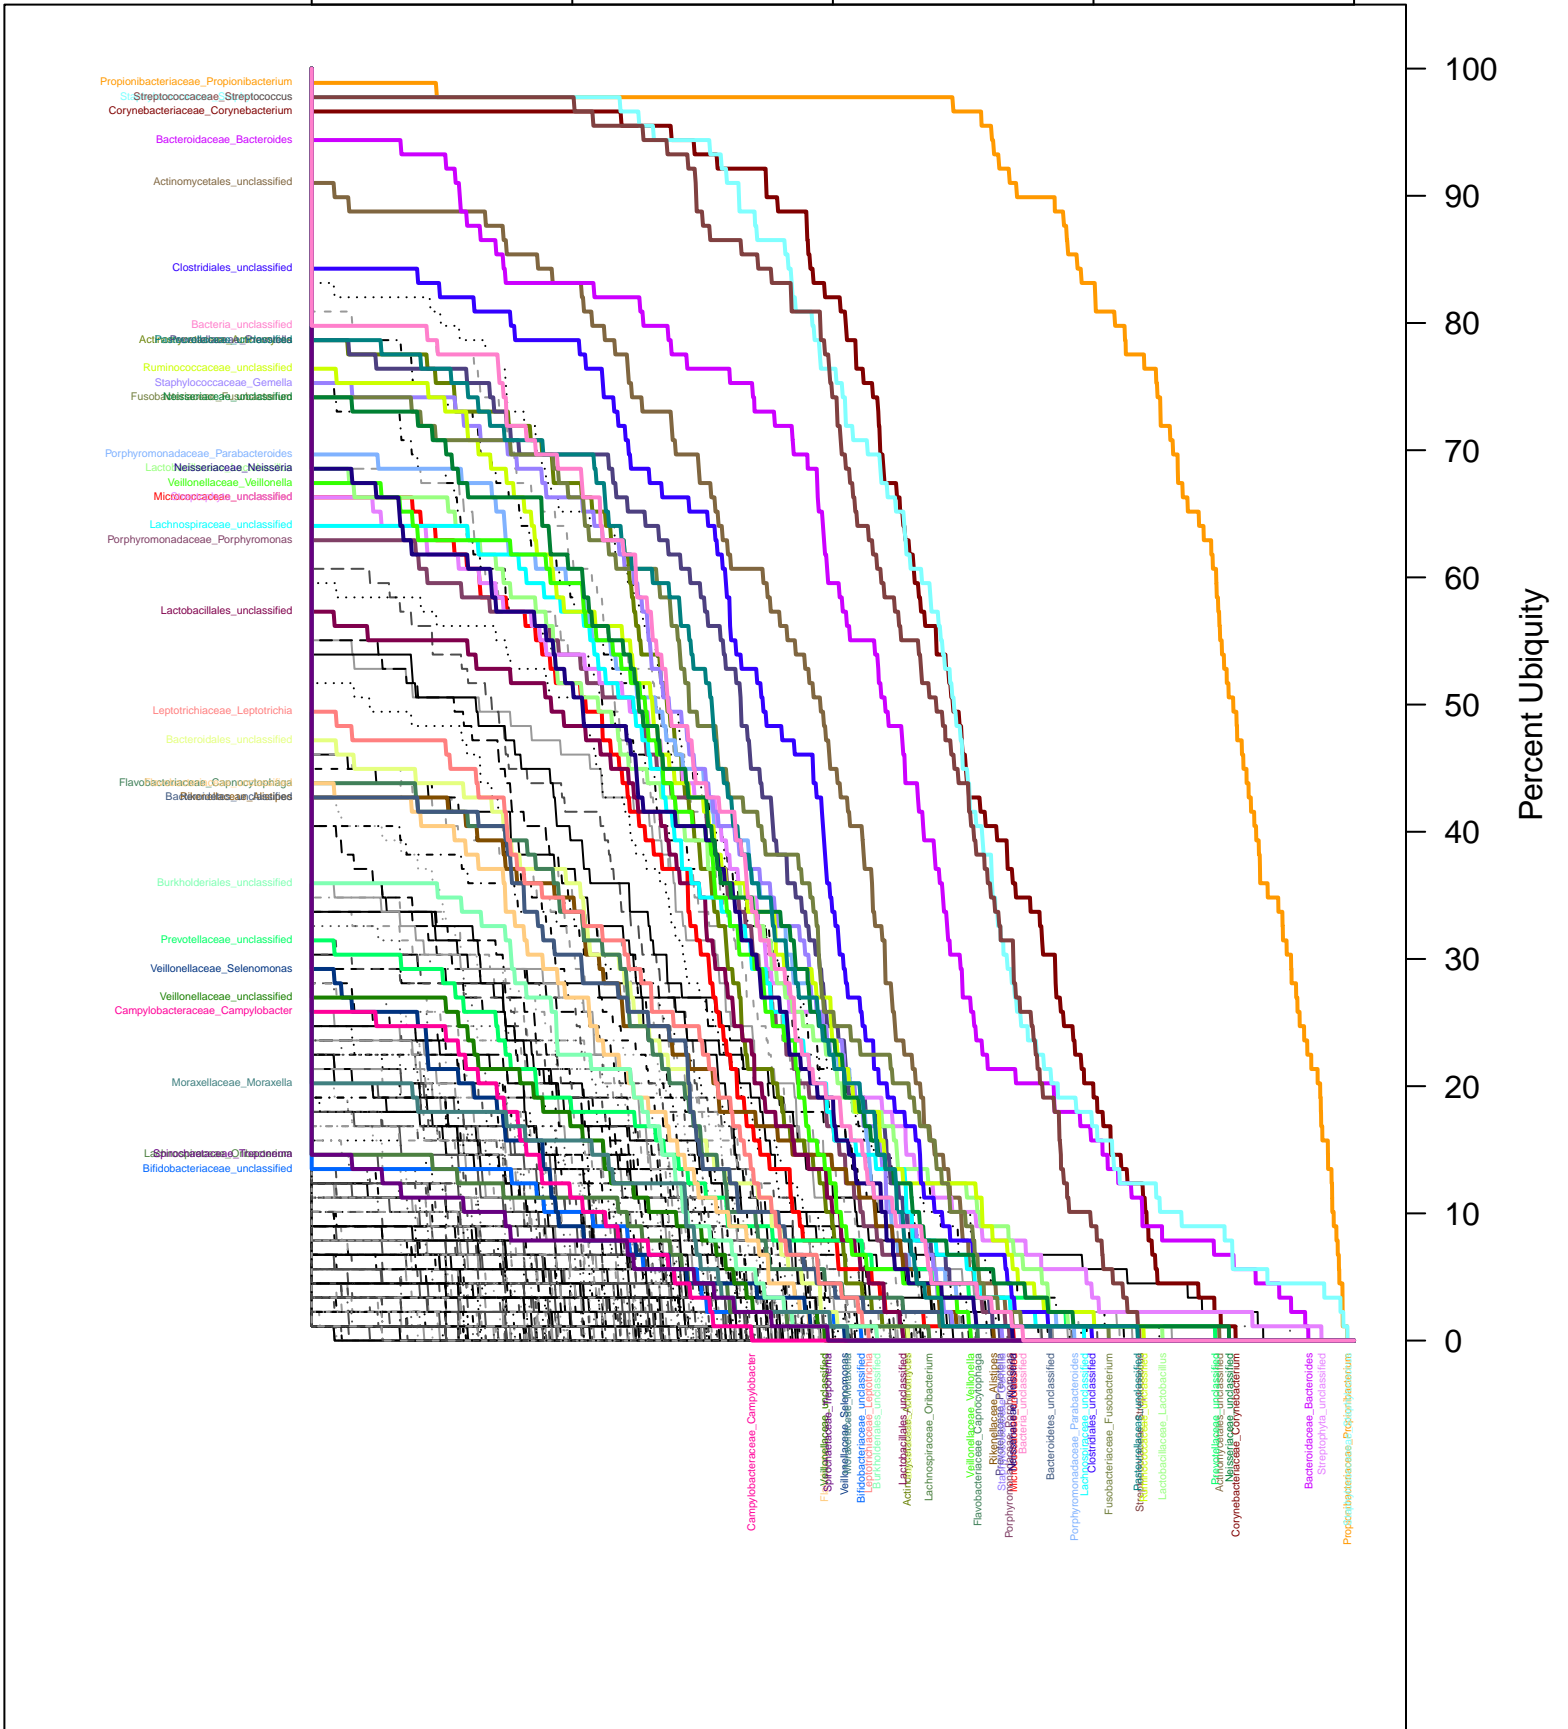

# v35.Taxa.L\_Retroauricular\_crease.cdf

Log<sub>10</sub>(Abundance)

-4                      -3                      -2                      -1                      0

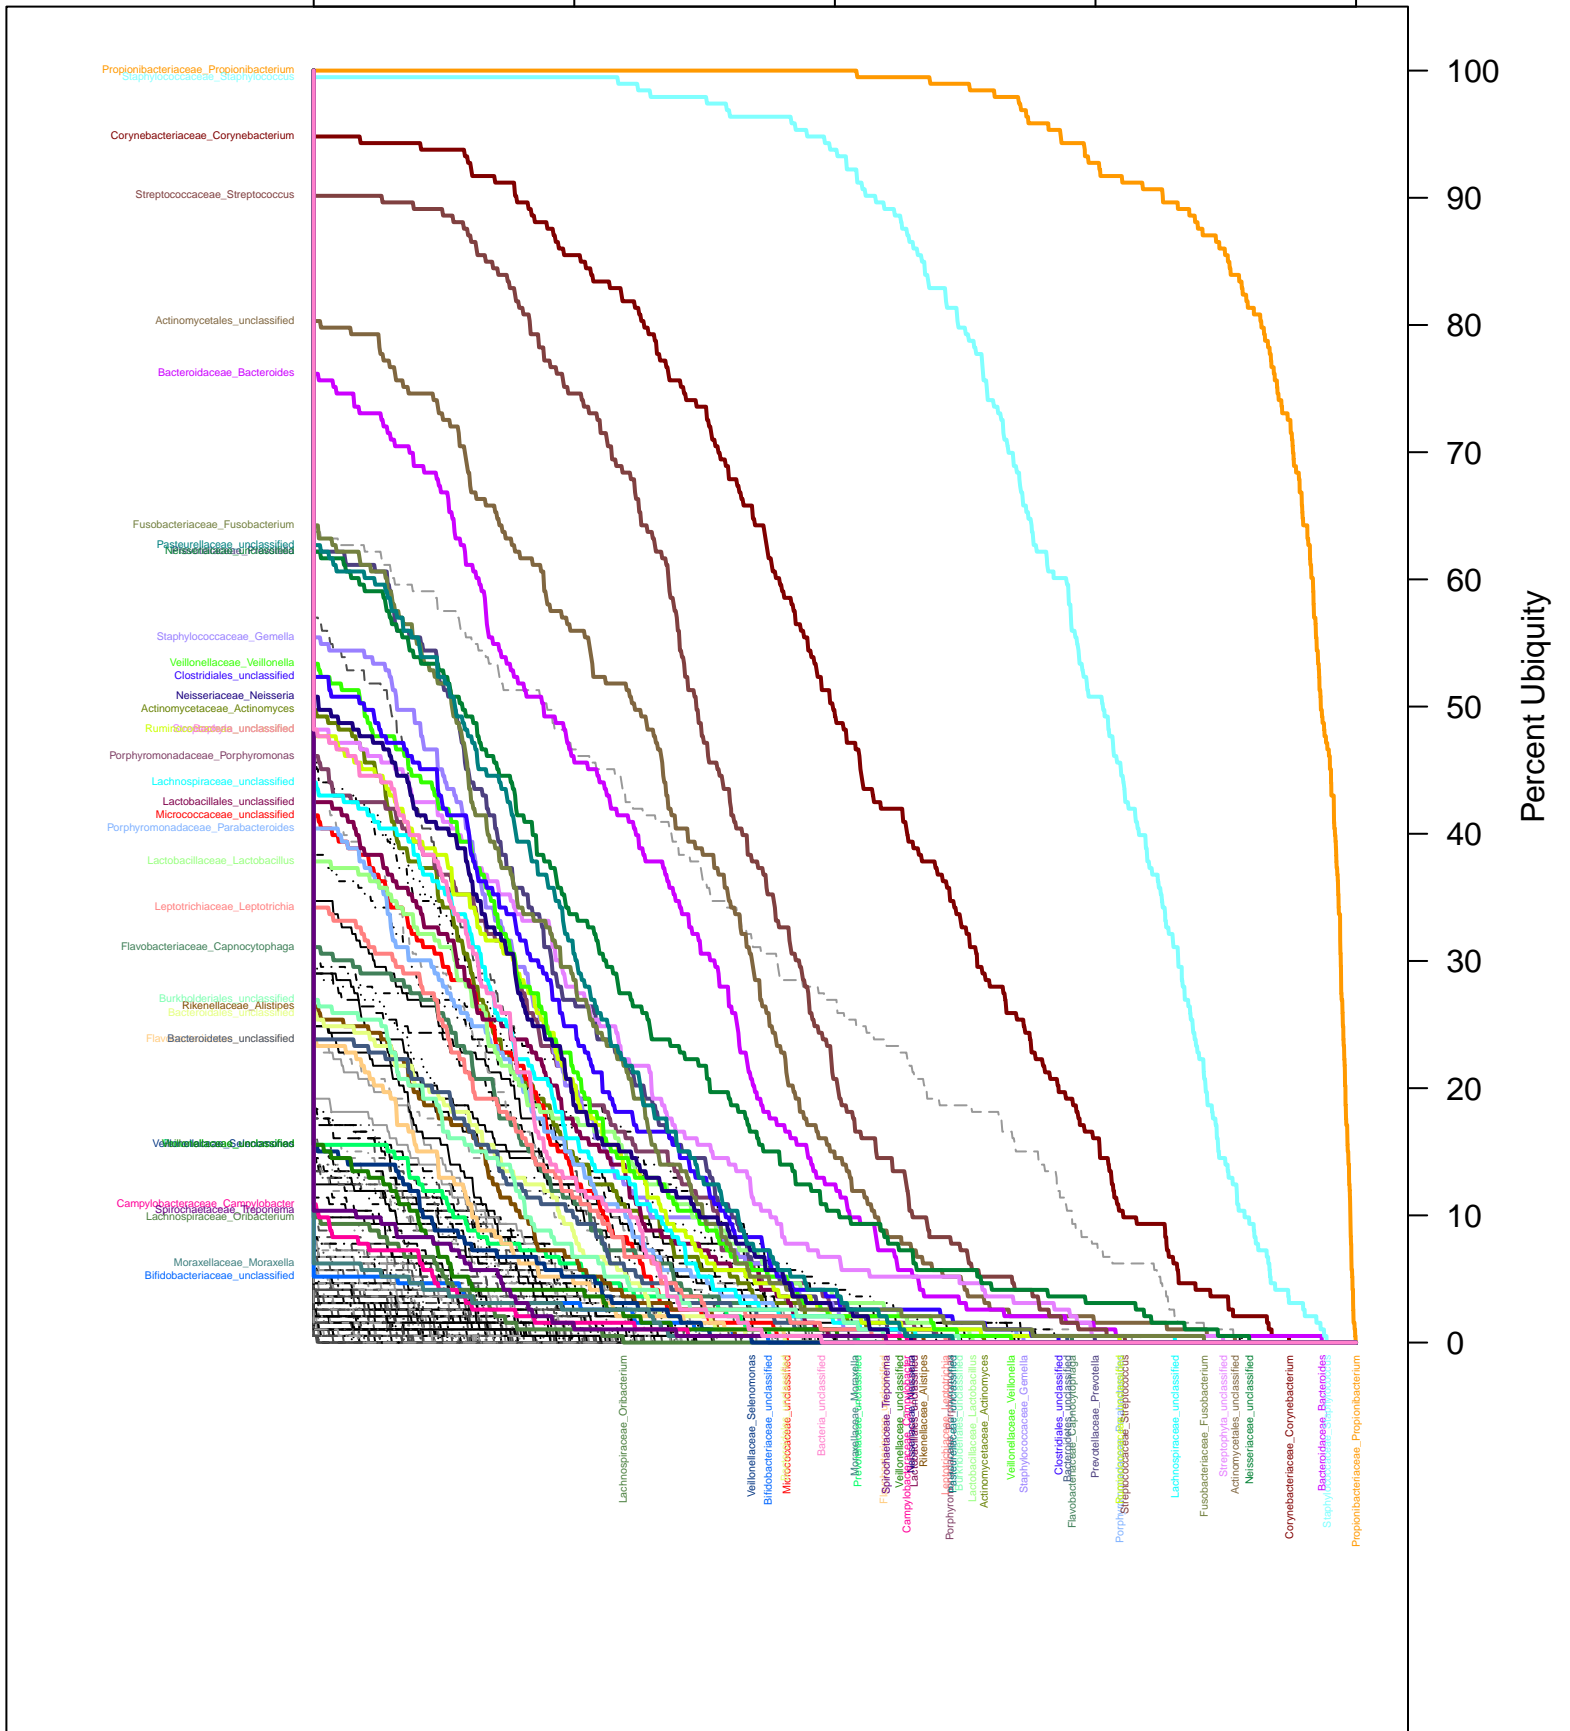



# v35.Taxa.Mid\_vagina.cdf

Log<sub>10</sub>(Abundance)

-4 -3 -2 -1 0

100

90

80

70

60

50

40

30

20

10

0

Percent Ubiquity

Lactobacillaceae\_Lactobacillus

Lactobacillales\_unclassified

Prevotellaceae\_Prevotella

Streptococcaceae\_Streptococcus

Bacteroidaceae\_Bacteroides

Corynebacteriaceae\_Corynebacterium

Bacteria\_unclassified

Lachnospiraceae\_unclassified

Propionibacteriaceae\_Propionibacterium

Staphylococcaceae\_unclassified

Ruminococcaceae\_unclassified

Actinomycetaceae\_Actinomycetes

Veillonellaceae\_Veillonella

Porphyromonadaceae\_Porphyromonas

Fusobacteriaceae\_Fusobacterium

Campylobacteriaceae\_Campylobacter

Staphylococcaceae\_Gemella

Veillonellaceae\_unclassified

Pasteurellaceae\_unclassified

Rikenellaceae\_Alistipes

Neisseriaceae\_Neisseria

Porphyromonadaceae\_Parabacteroides

Leptotrichiaceae\_Leptotrichia

Micrococcaceae\_unclassified

Bacteroidales\_unclassified

Bacteroidetes\_unclassified

Flavobacteriaceae\_Capnocytophaga

Veillonellaceae\_unclassified

Burkholderiales\_unclassified

Moraxellaceae\_Moraxella

Moraxellaceae\_Moraxella

Lachnospiraceae\_Oribacterium

Veillonellaceae\_unclassified

Spirochaetaceae\_Treponema

Veillonellaceae\_Selencomonas

Micrococcaceae\_unclassified

Flavobacteriaceae\_Capnocytophaga

Neisseriaceae\_Neisseria

Rikenellaceae\_Alistipes

Leptotrichiaceae\_Leptotrichia

Flavobacteriaceae\_unclassified

Bacteroidetes\_unclassified

Prevotellaceae\_Prevotella

Veillonellaceae\_Veillonella

Actinomycetaceae\_Actinomycetes

Campylobacteriaceae\_Campylobacter

Veillonellaceae\_unclassified

Porphyromonadaceae\_Porphyromonas

Fusobacteriaceae\_Fusobacterium

Bacteria\_unclassified

Staphylococcaceae\_Staphylococcus

Lactobacillales\_unclassified

Fusobacteriaceae\_Fusobacterium

Lachnospiraceae\_unclassified

Prevotellaceae\_unclassified

Streptococcaceae\_Streptococcus

Corynebacteriaceae\_Corynebacterium

Prevotellaceae\_Prevotella

Clostridiales\_unclassified

Bifidobacteriaceae\_unclassified

Lactobacillaceae\_Lactobacillus

# v35.Taxa.Palatine\_Tonsils.cdf

Log<sub>10</sub>(Abundance)

-4 -3 -2 -1 0

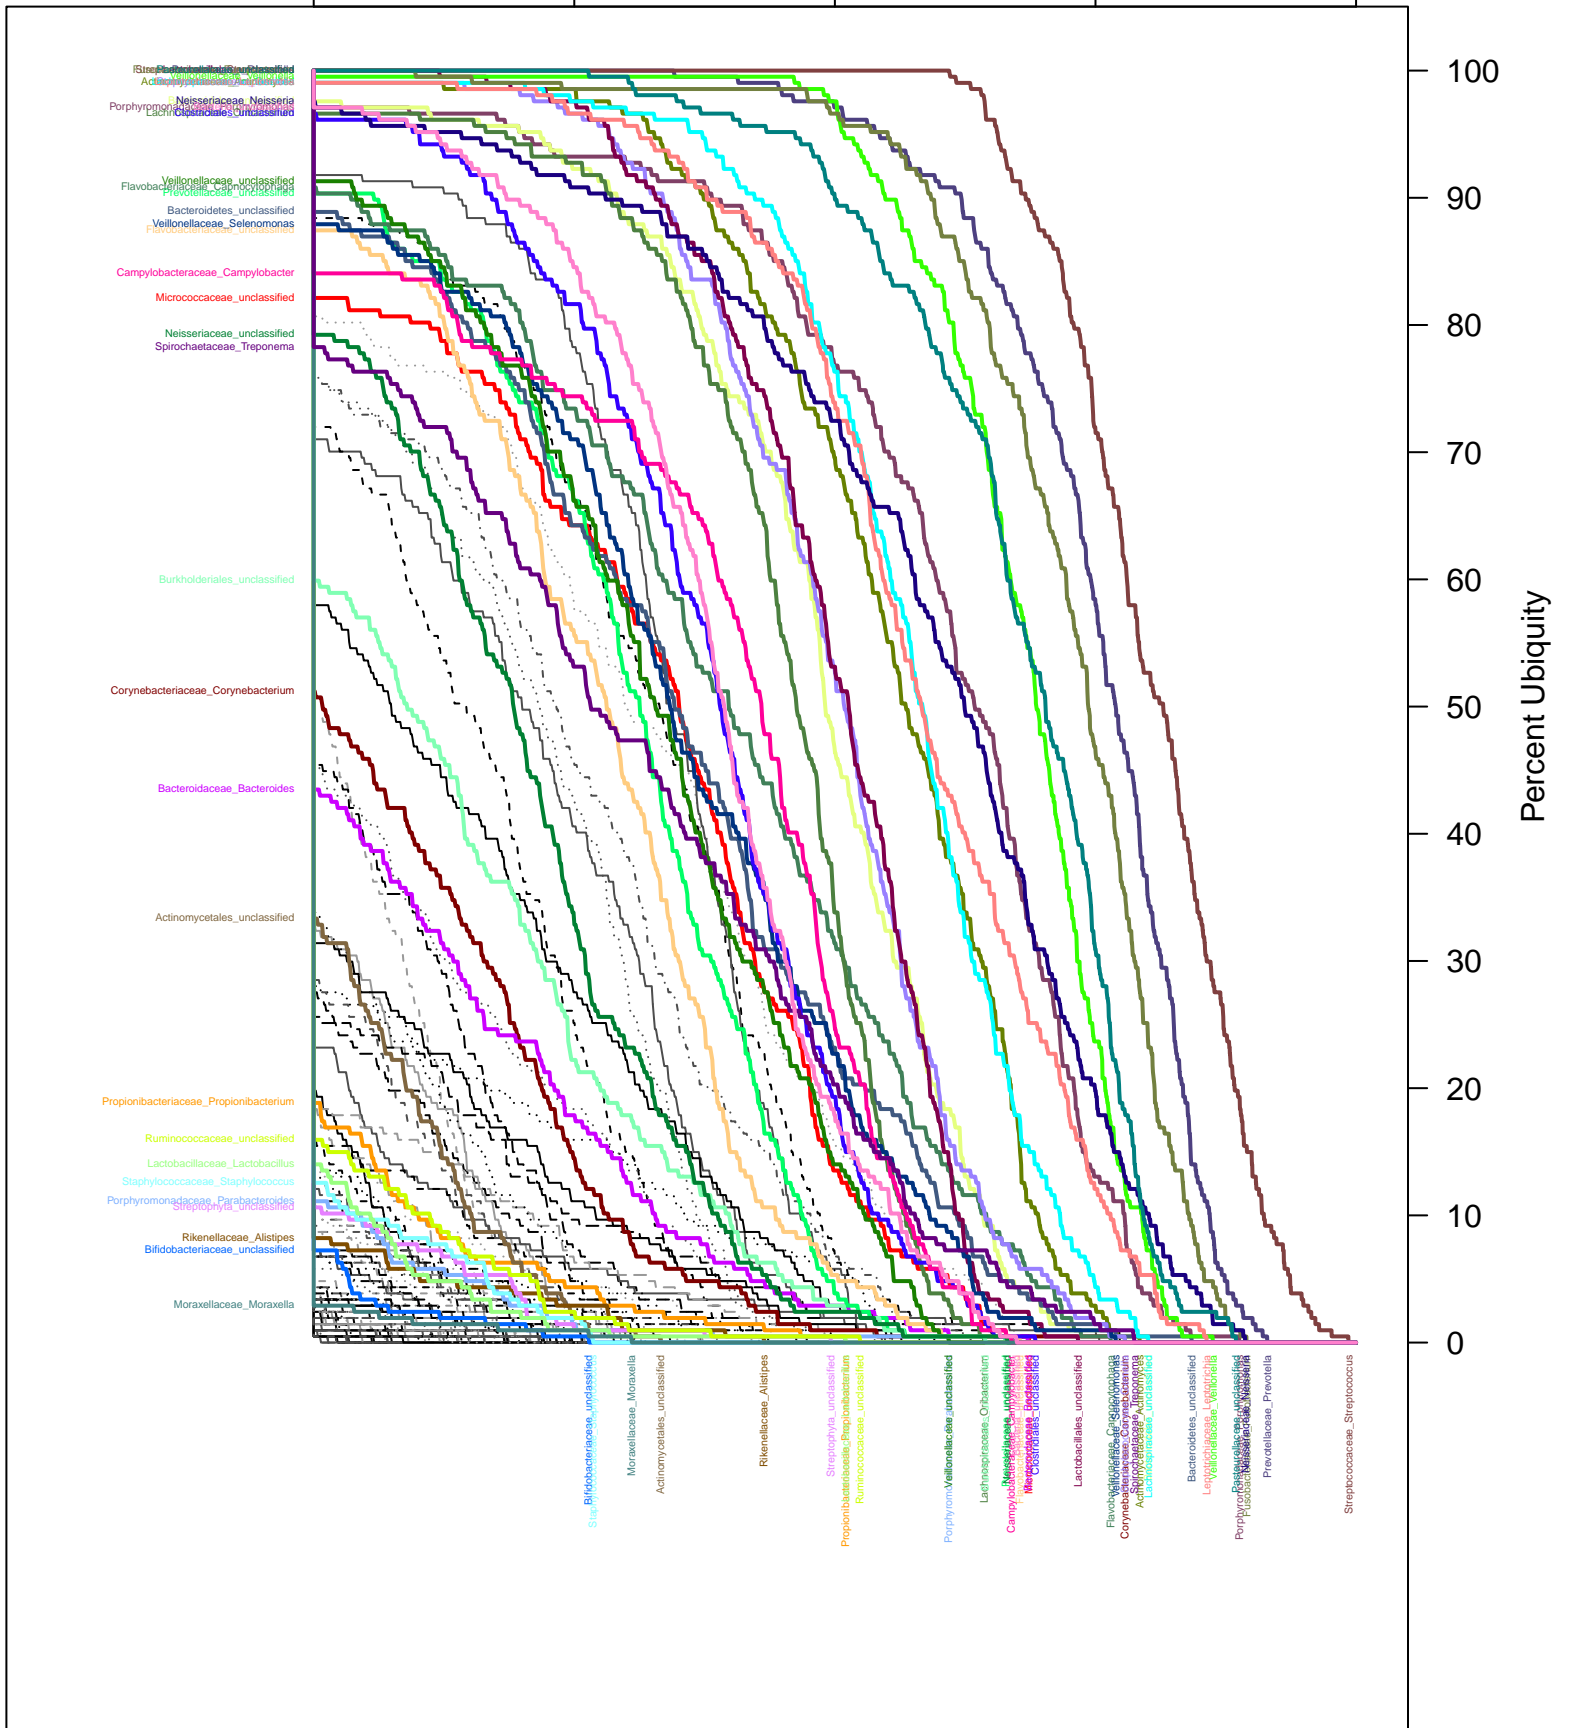



# v35.Taxa.Posterior\_fornix.cdf

Log<sub>10</sub>(Abundance)

-4                      -3                      -2                      -1                      0

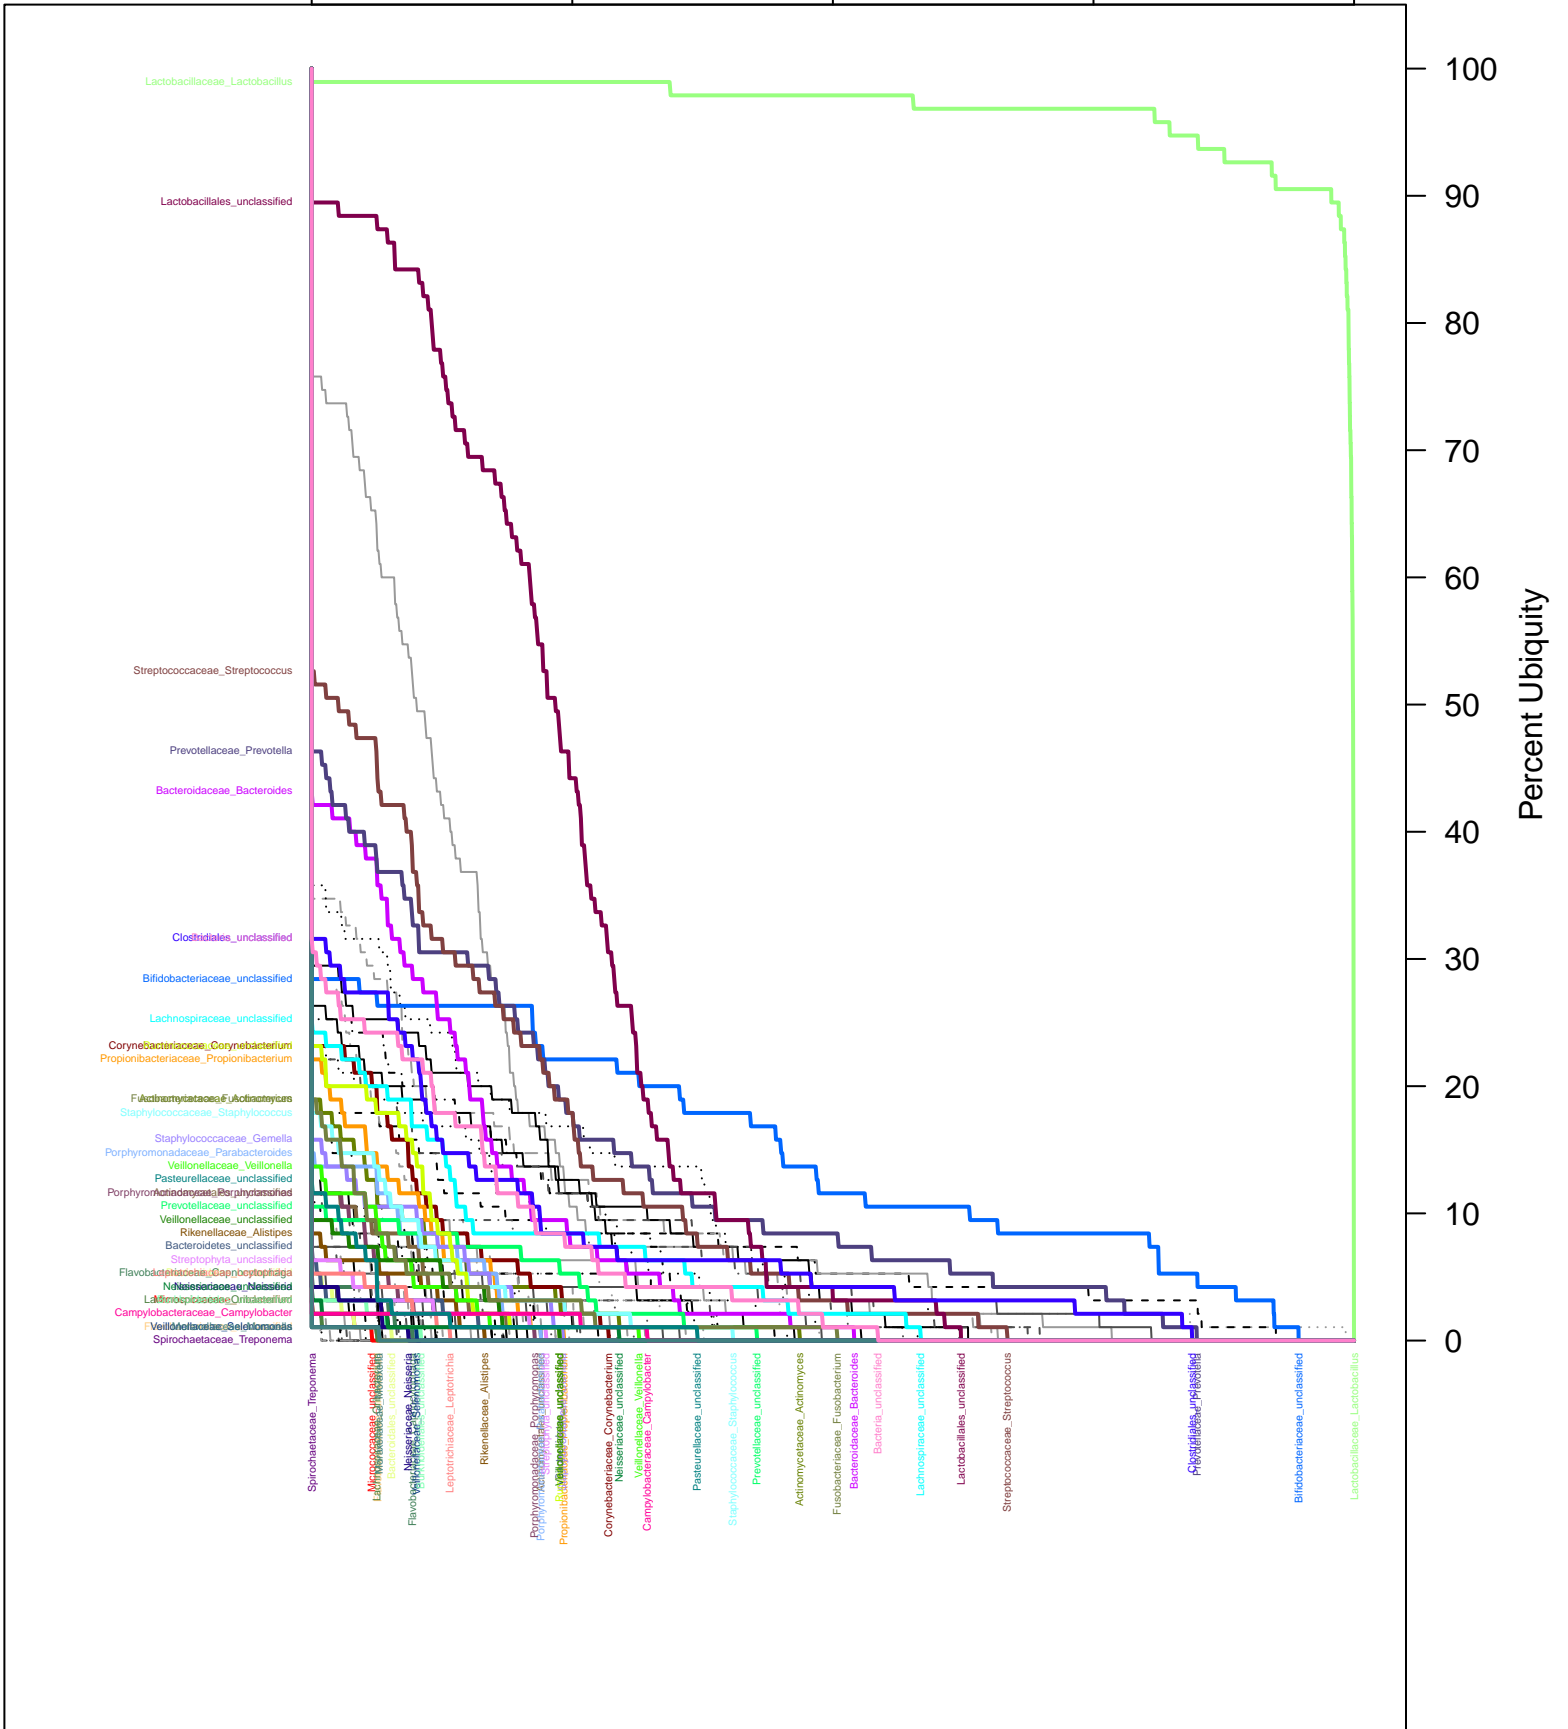

# v35.Taxa.R\_Antecubital\_fossa.cdf

Log<sub>10</sub>(Abundance)

-4                      -3                      -2                      -1                      0

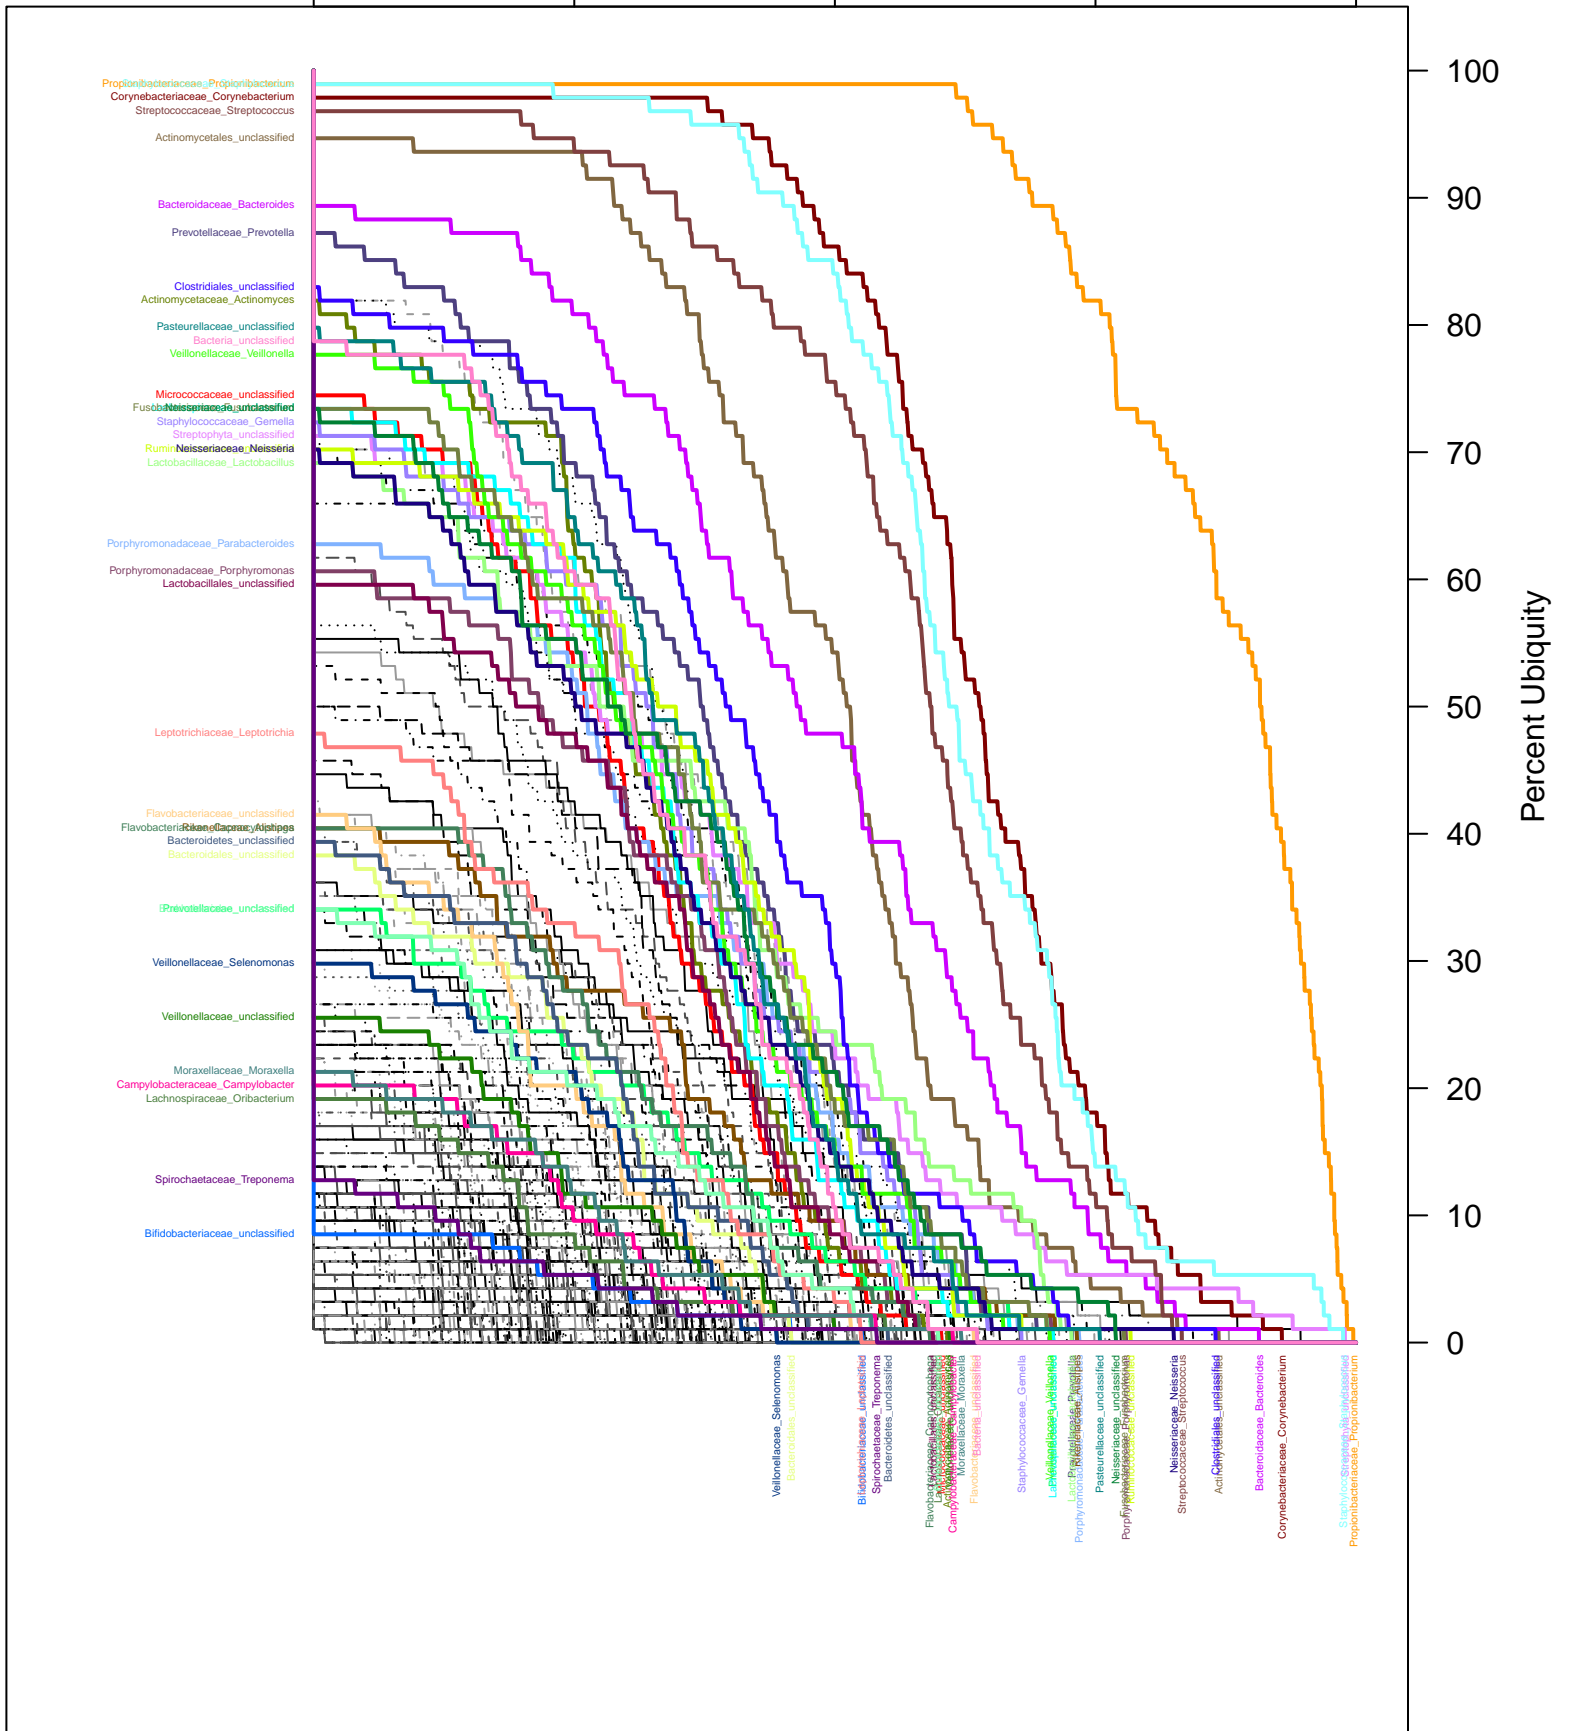



# v35.Taxa.Saliva.cdf

Log<sub>10</sub>(Abundance)

-4                      -3                      -2                      -1                      0

Popillidae  
Flavobacteriaceae\_Spirillum  
Verrucomycetozoa  
Lactosporaceae  
Mniotrypa  
Prevotellaceae\_unclassified  
Bacteroidetes\_unclassified  
Burkholderiales\_unclassified  
Campylobacteriaceae\_Campylobacter  
Corynebacteriaceae\_Corynebacterium  
Spirochaetaeae\_Treponema  
Bacteroidaceae\_Bacteroides  
Actinomyetales\_unclassified  
Propionibacteriaceae\_Propionibacterium  
Porphyromonadaceae\_Parabacteroides  
Ruminococcaceae\_unclassified  
Streptophyta\_unclassified  
Rikenellaceae\_Alistipes  
Lactobacillaceae\_Lactobacillus  
Staphylococcaceae\_Staphylococcus  
Bifidobacteriaceae\_unclassified  
Moraxellaceae\_Moraxella

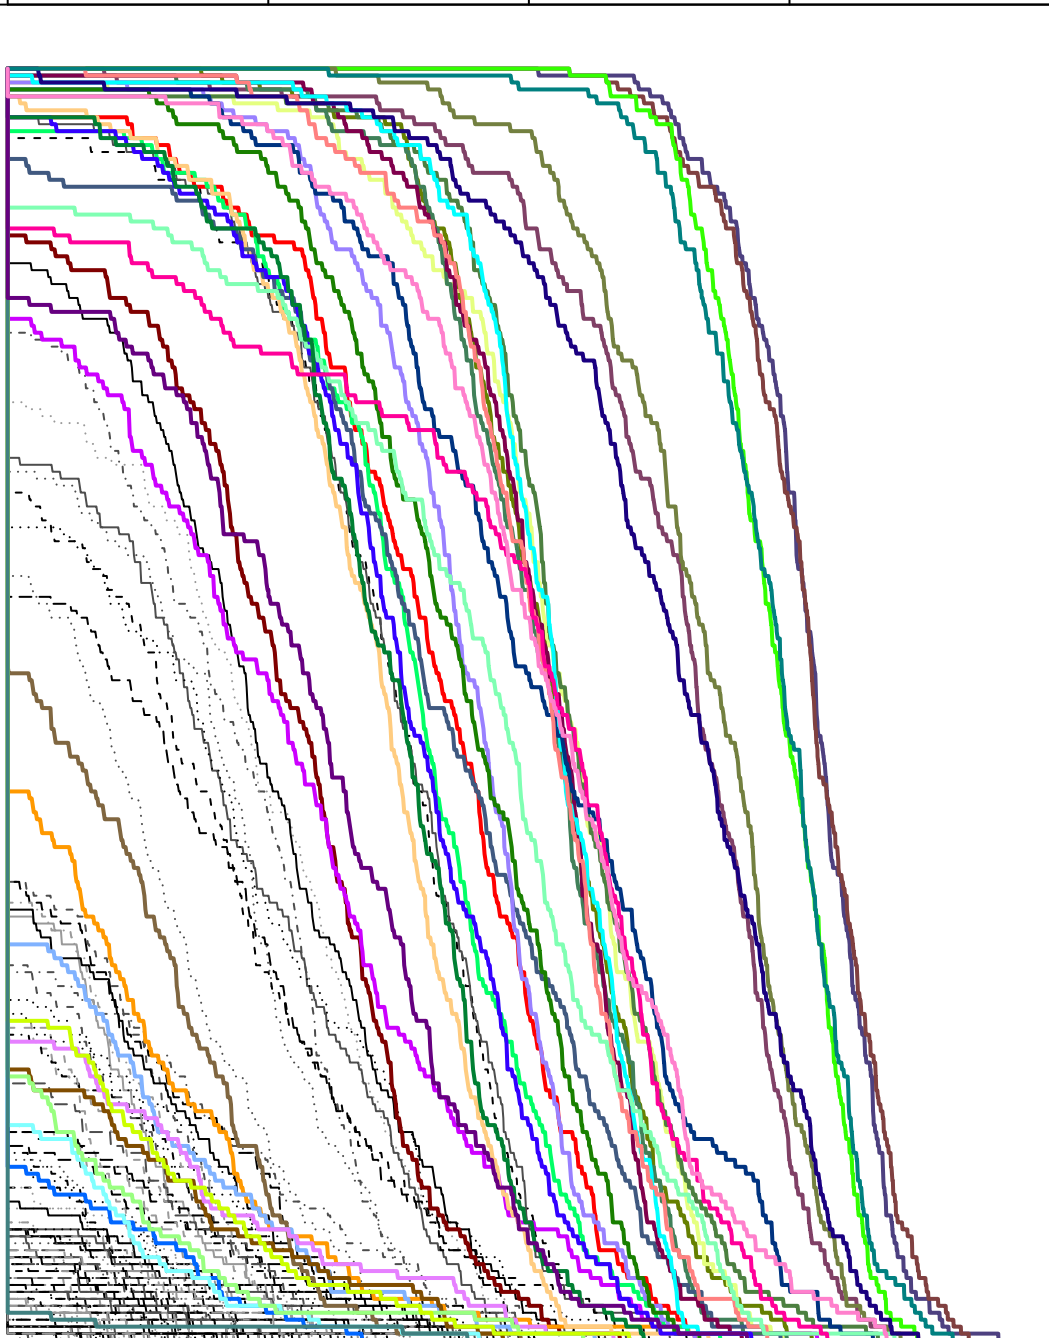

100  
90  
80  
70  
60  
50  
40  
30  
20  
10  
0

Percent Ubiquity

Bifidobacteriaceae\_unclassified  
Moraxellaceae\_Moraxella  
Staphylococcaceae\_Staphylococcus  
Rikenellaceae\_Alistipes  
Actinomyetales\_unclassified  
Lactobacillaceae\_Lactobacillus  
Porphyromonadaceae\_Parabacteroides  
Corynebacteriaceae\_Corynebacterium  
Ruminococcaceae\_unclassified  
Neisseriaceae\_unclassified  
Mycobacteriaceae\_unclassified  
Flavobacteriaceae\_unclassified  
Prevotellaceae\_unclassified  
Propionibacteriaceae\_unclassified  
Lepidoptera  
Flavobacteriaceae\_Spirillum  
Actinomycetales\_unclassified  
Campylobacteriaceae\_Campylobacter  
Lactobacillaceae\_Spirochaeta  
Fusobacteriaceae\_Fusobacterium  
Porphyromonadaceae\_Moraxella  
Pasteurellaceae\_unclassified  
Streptococcaceae\_Streptococcus  
Prevotellaceae\_Prevotella

# v35.Taxa.Stool.cdf

Log<sub>10</sub>(Abundance)

-4 -3 -2 -1 0

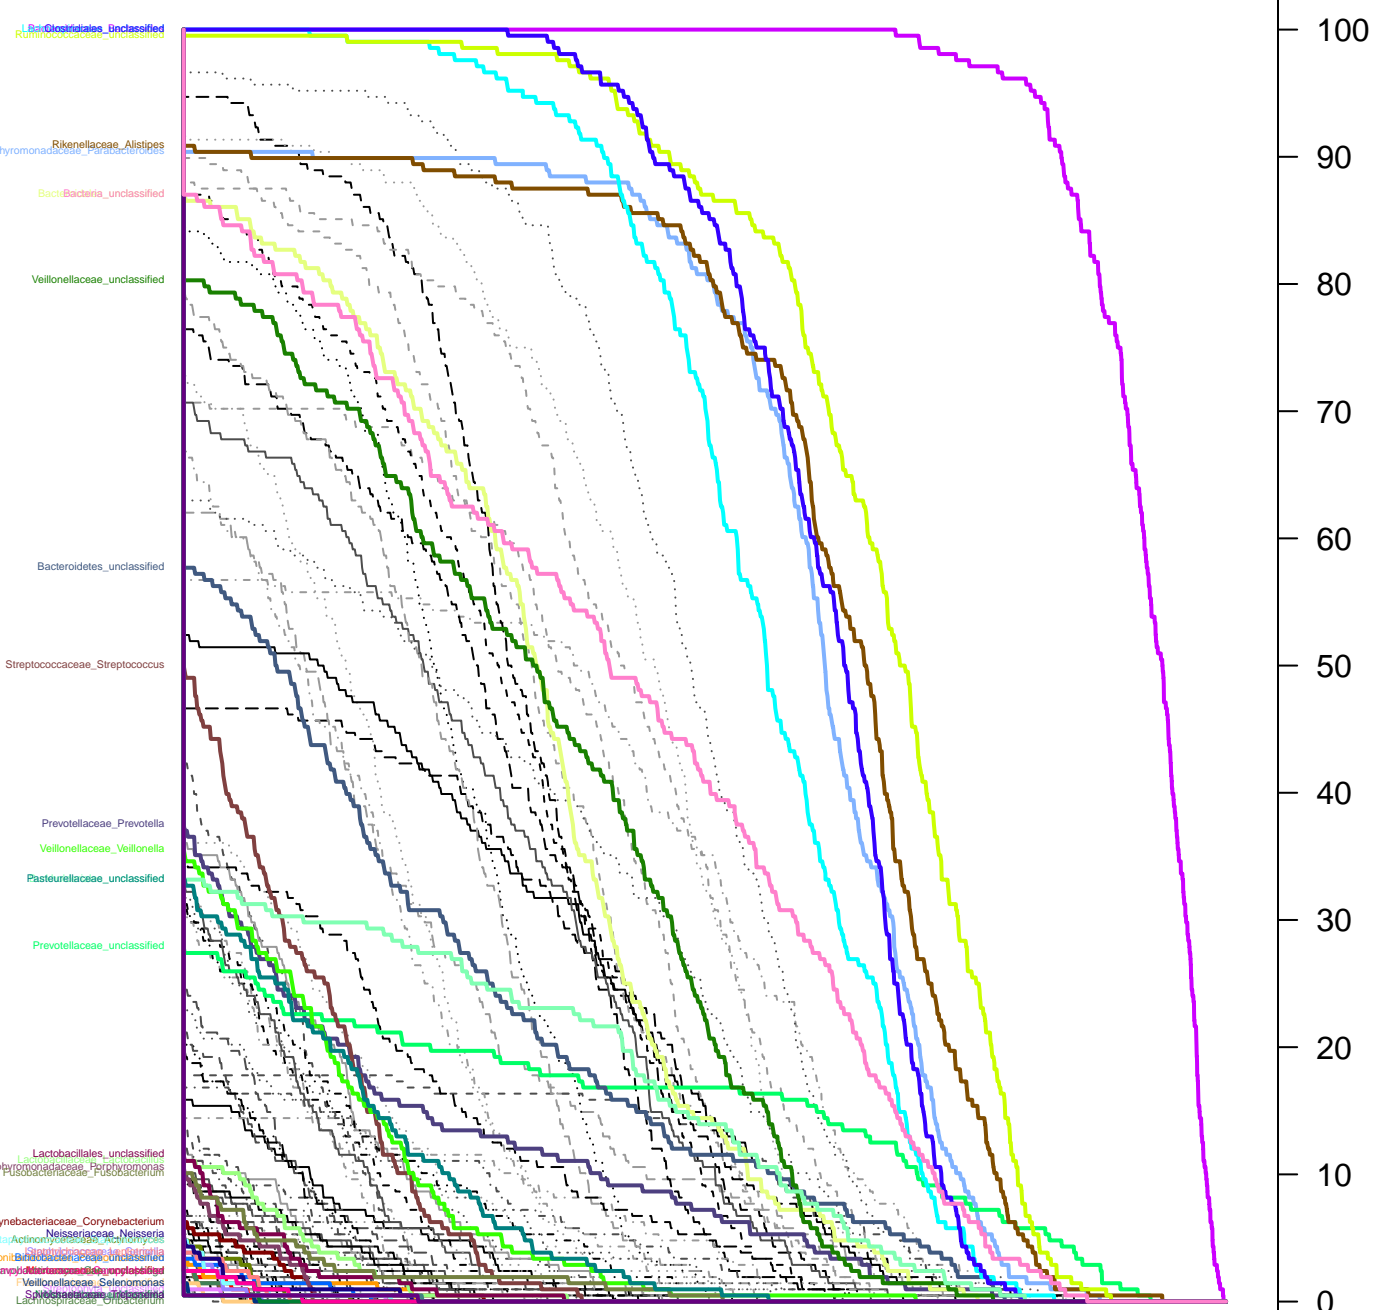

Percent Ubiquity

- Lachnospiraceae\_Oribacterium
- Flavobacteriaceae\_unclassified
- Mitochondriaceae\_unclassified
- Flavobacteriaceae\_Capnocytophaga
- Lepidopterae\_Lepidoptera
- Comp
- Actinomycetaceae\_Actinomycetes
- Porphyromonadaceae\_Porphyrionas
- Streptococcaceae\_Streptococcus
- Propionibacteriaceae\_Neisseria
- Corynebacteriaceae\_Corynebacterium
- Streptococcaceae\_Streptococcus
- Streptococcaceae\_Streptococcus
- Fusobacteriaceae\_Fusobacterium
- Pasteurellaceae\_unclassified
- Veillonellaceae\_Veillonella
- Bacteroidales\_unclassified
- Veillonellaceae\_unclassified
- Bl
- Propionibacteriaceae\_Propionibacterium
- Lachnospiraceae\_unclassified
- Bacteroidales\_unclassified
- Porphyromonadaceae\_Porphyrionas
- Ruminococcaceae\_unclassified
- Prevotellaceae\_unclassified
- Rikenellaceae\_Alistipes
- Bacteroidales\_Bacteroides





# v35.Taxa.Supragingival\_plaque.cdf

Log<sub>10</sub>(Abundance)

-4 -3 -2 -1 0

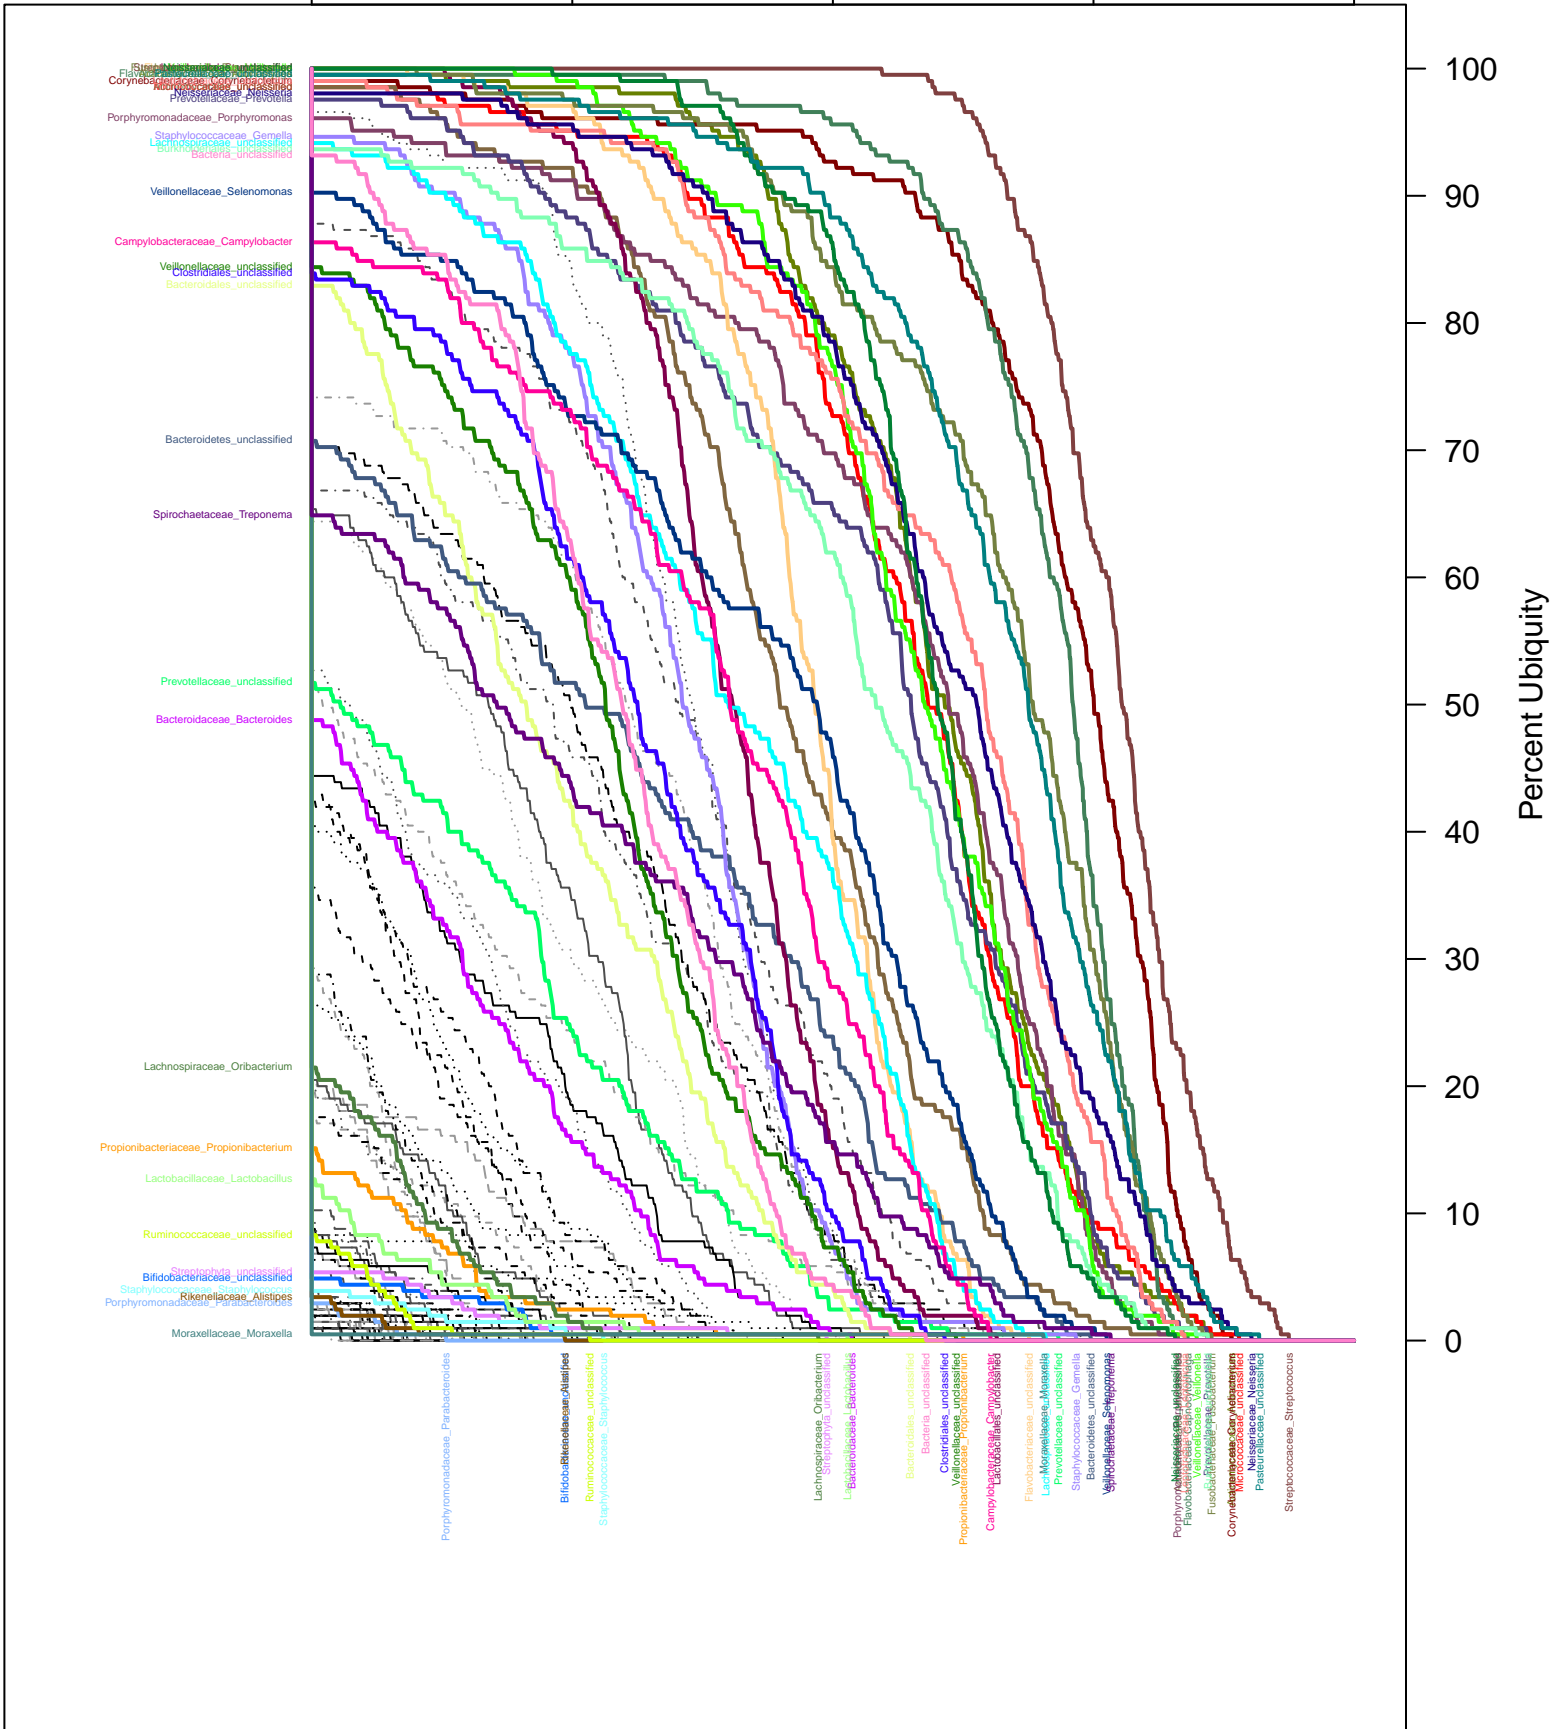

# v35.Taxa.Throat.cdf

Log<sub>10</sub>(Abundance)

-4 -3 -2 -1 0

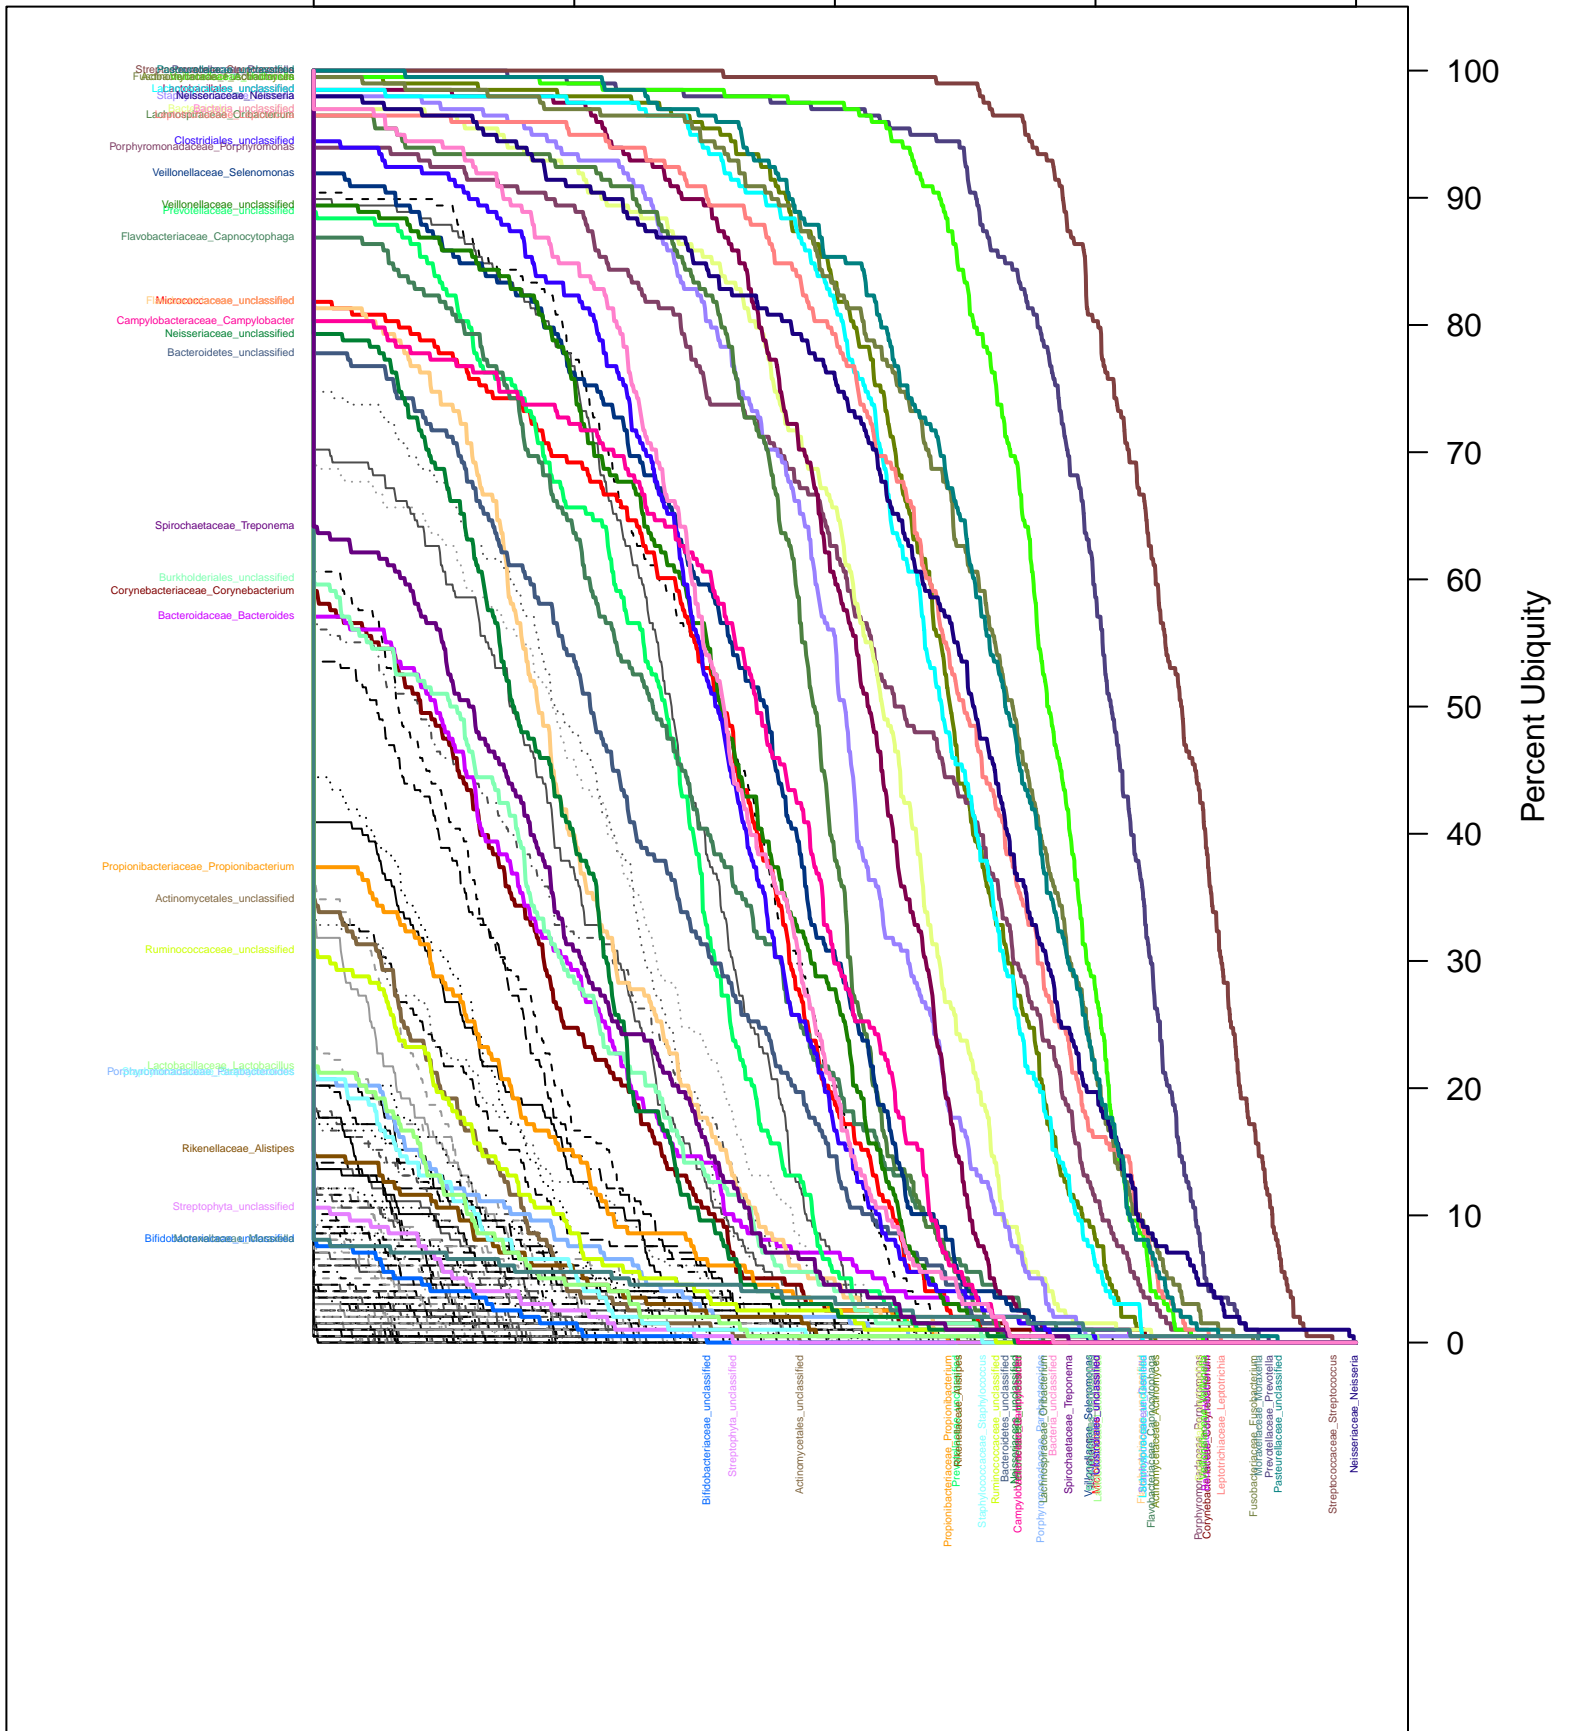

# v35.Taxa.Tongue\_dorsum.cdf

Log<sub>10</sub>(Abundance)

-4                      -3                      -2                      -1                      0

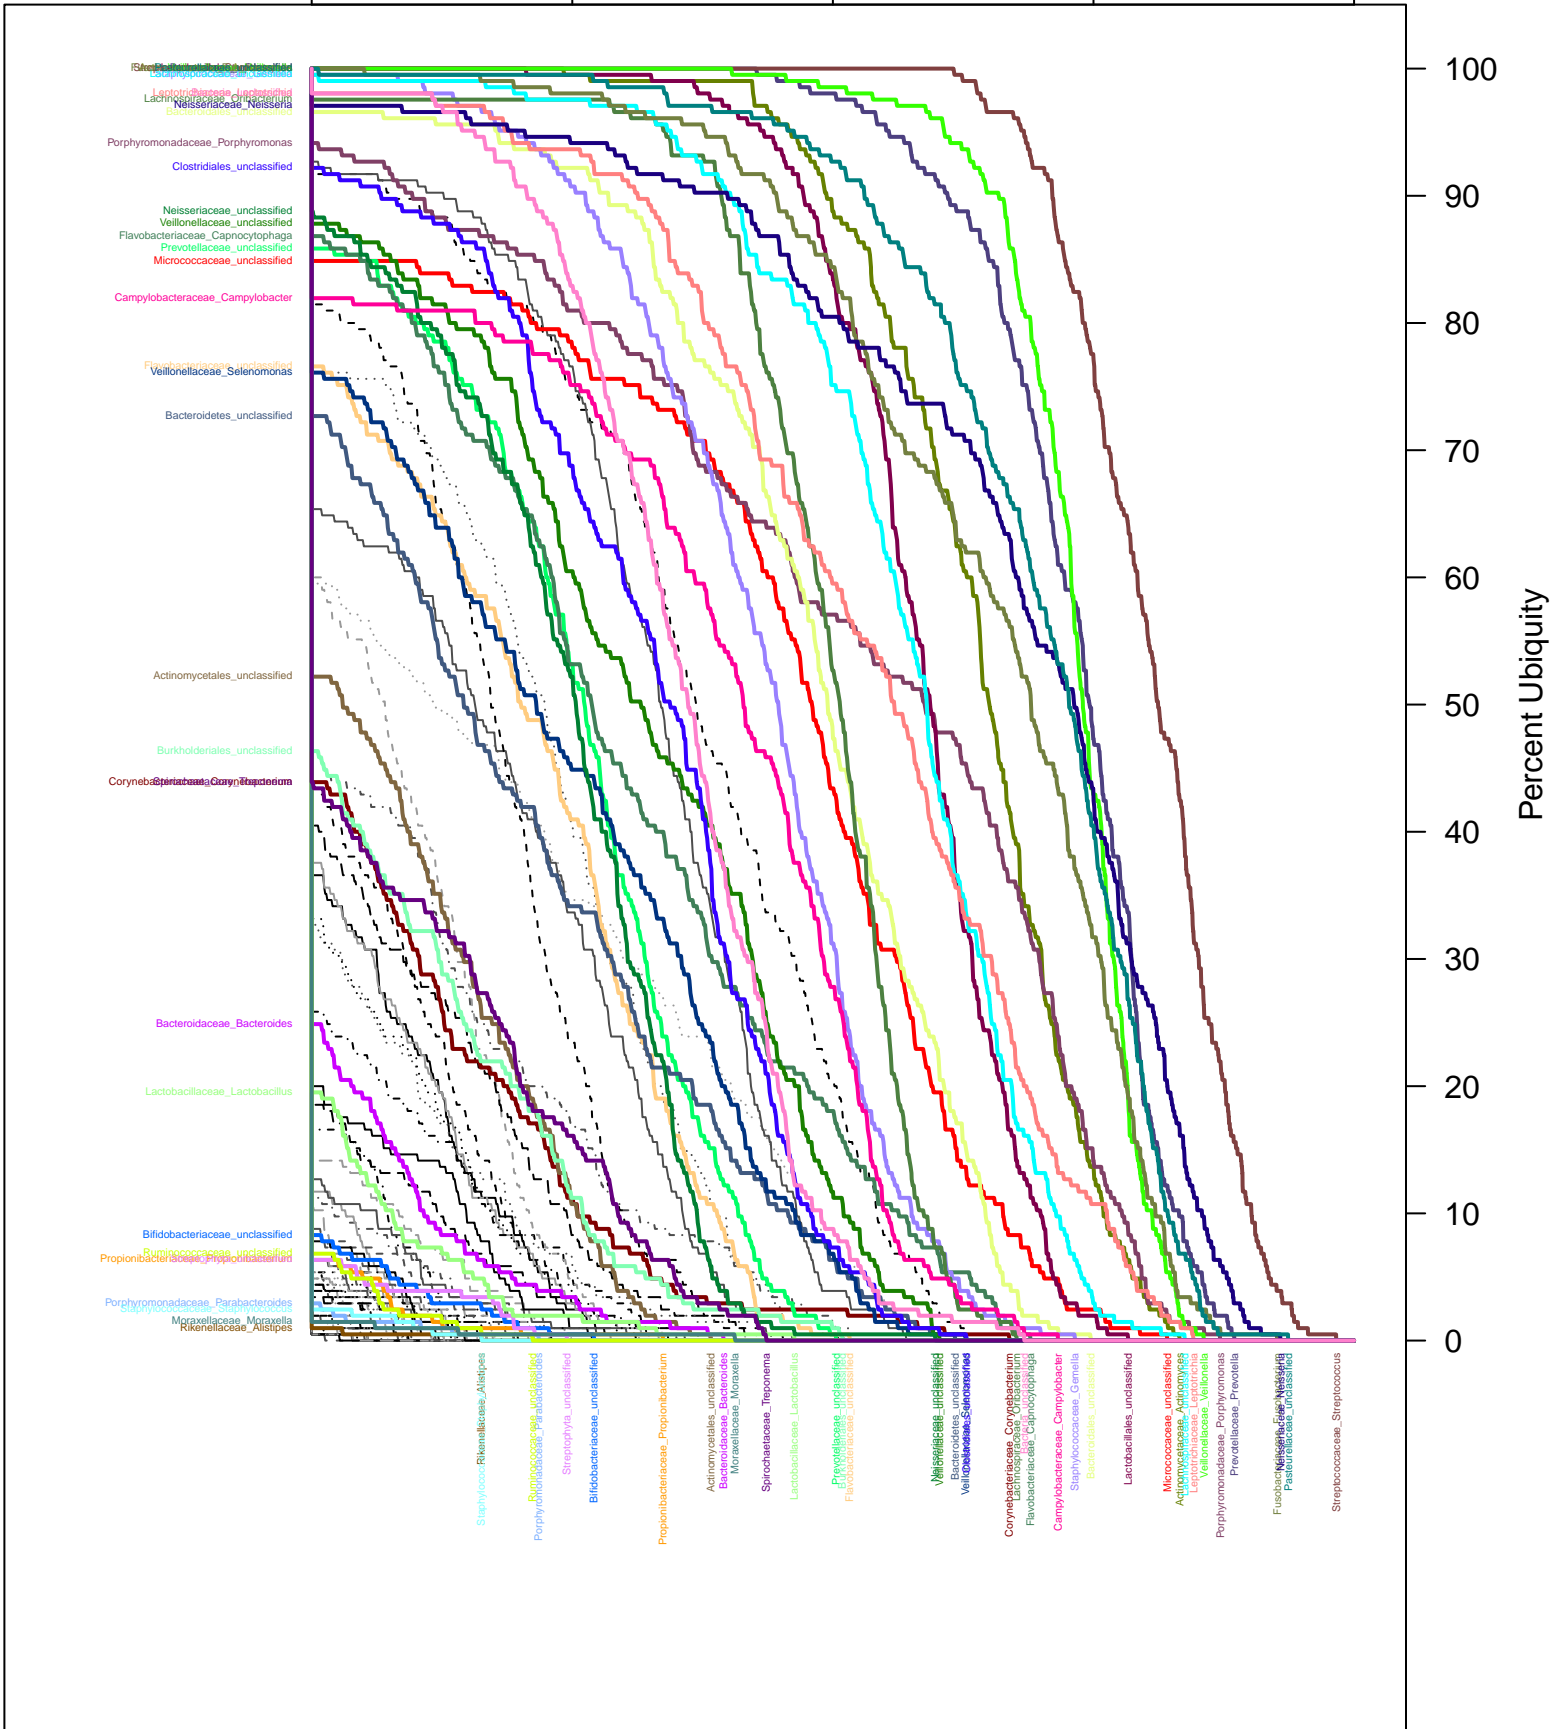

# v35.Taxa.Vaginal\_introitus.cdf

Log<sub>10</sub>(Abundance)

-4                      -3                      -2                      -1                      0

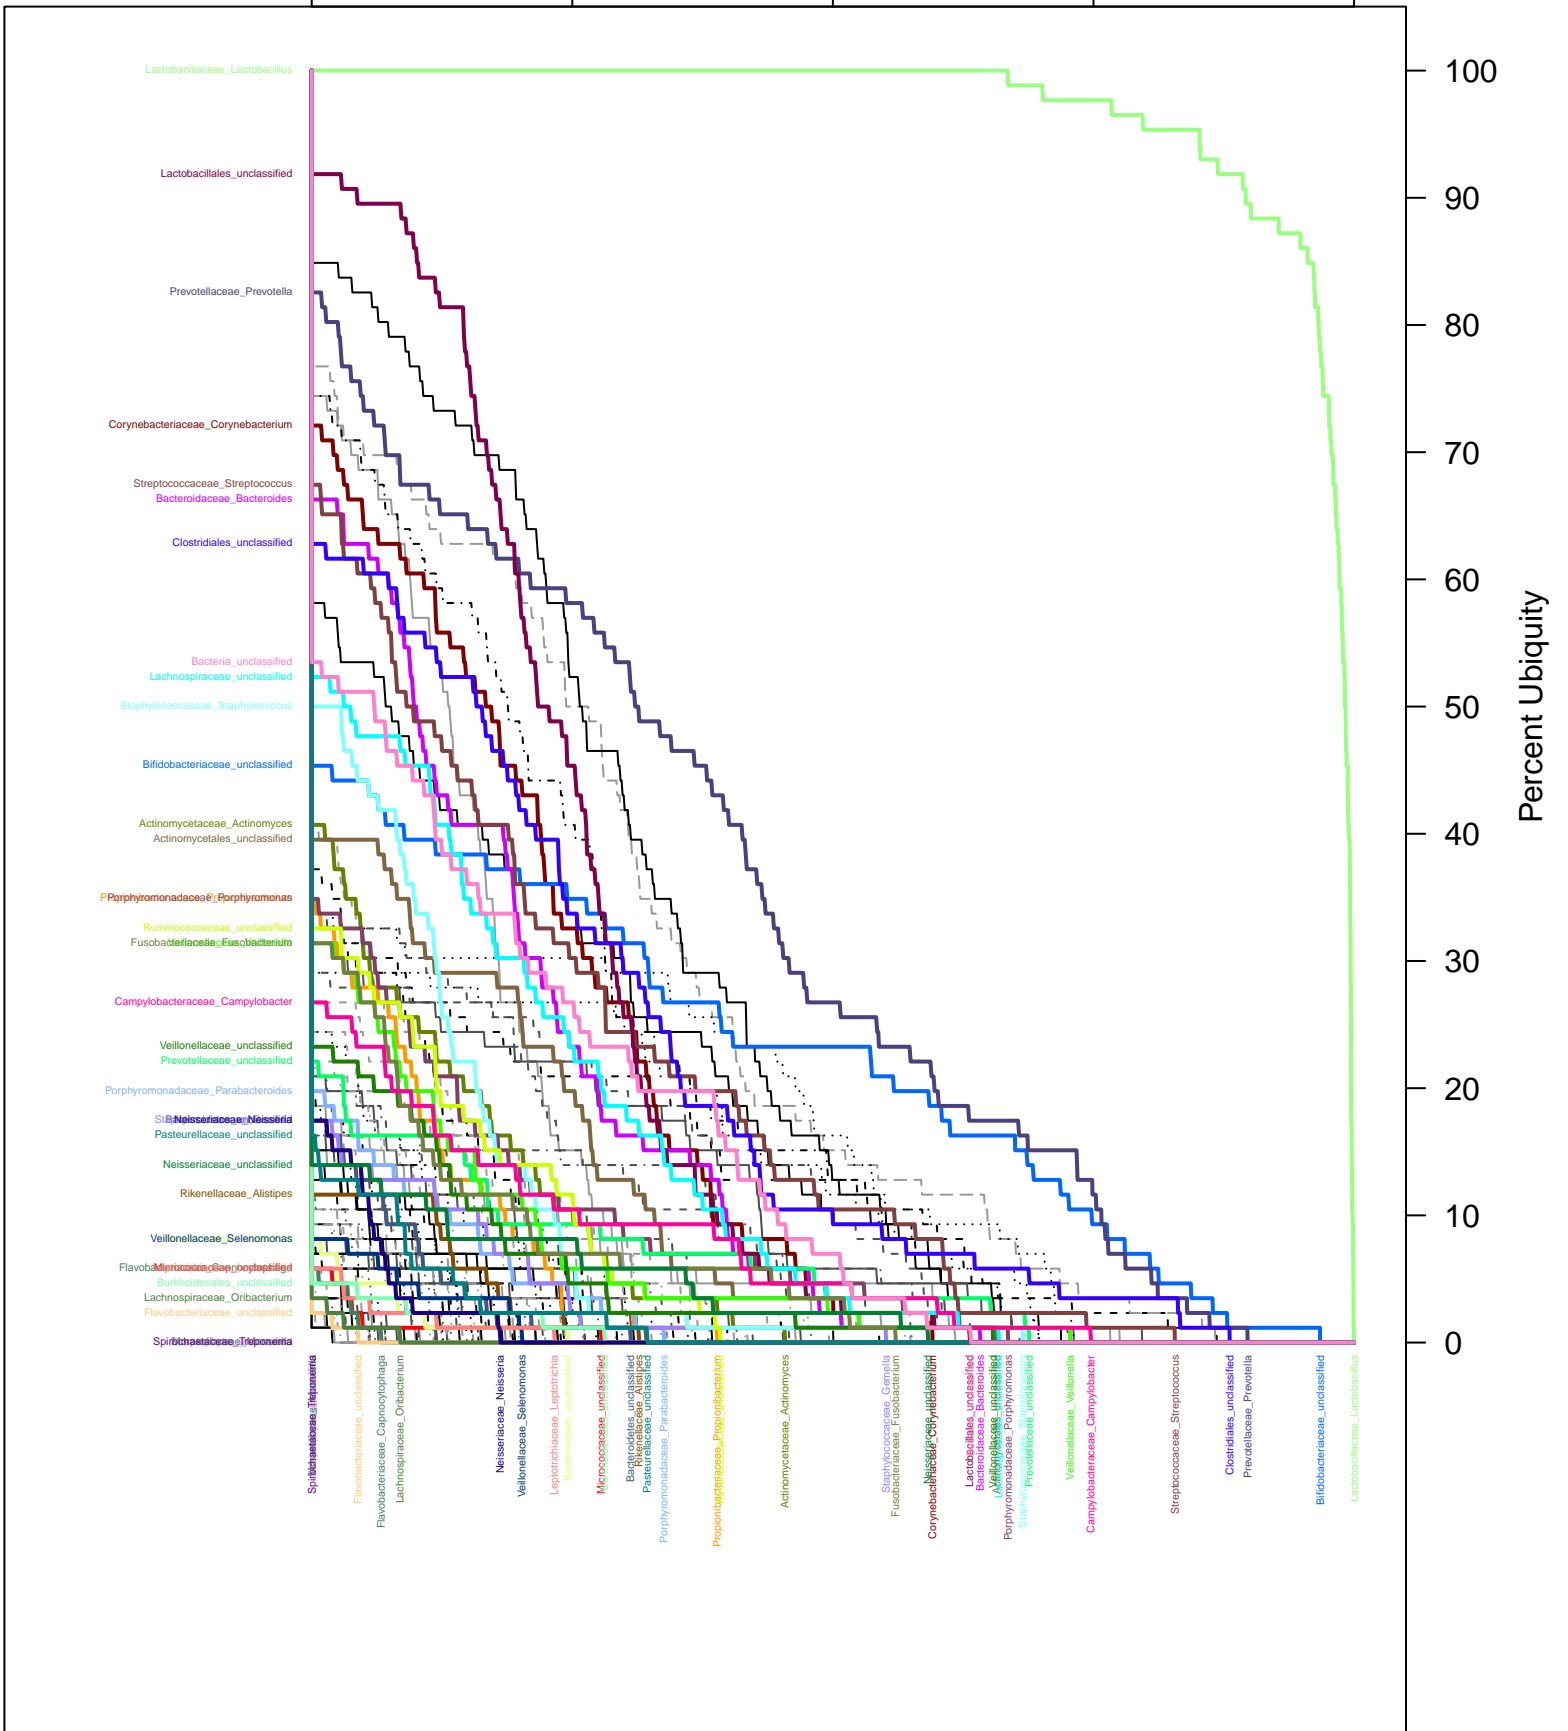

Supplement: pone.0063139.s001.pdf [file pone.0063139.s001.pdf]
