# Supplementary material for: Analyses of the Stability and Core Taxonomic Memberships of the Human Microbiome
Source: PubMed Central journal article supplement (PMC3646044; doi:10.1371/journal.pone.0063139), 2013-05-06

# Variation vs. Abundance

v35.Taxa.Anterior\_nares

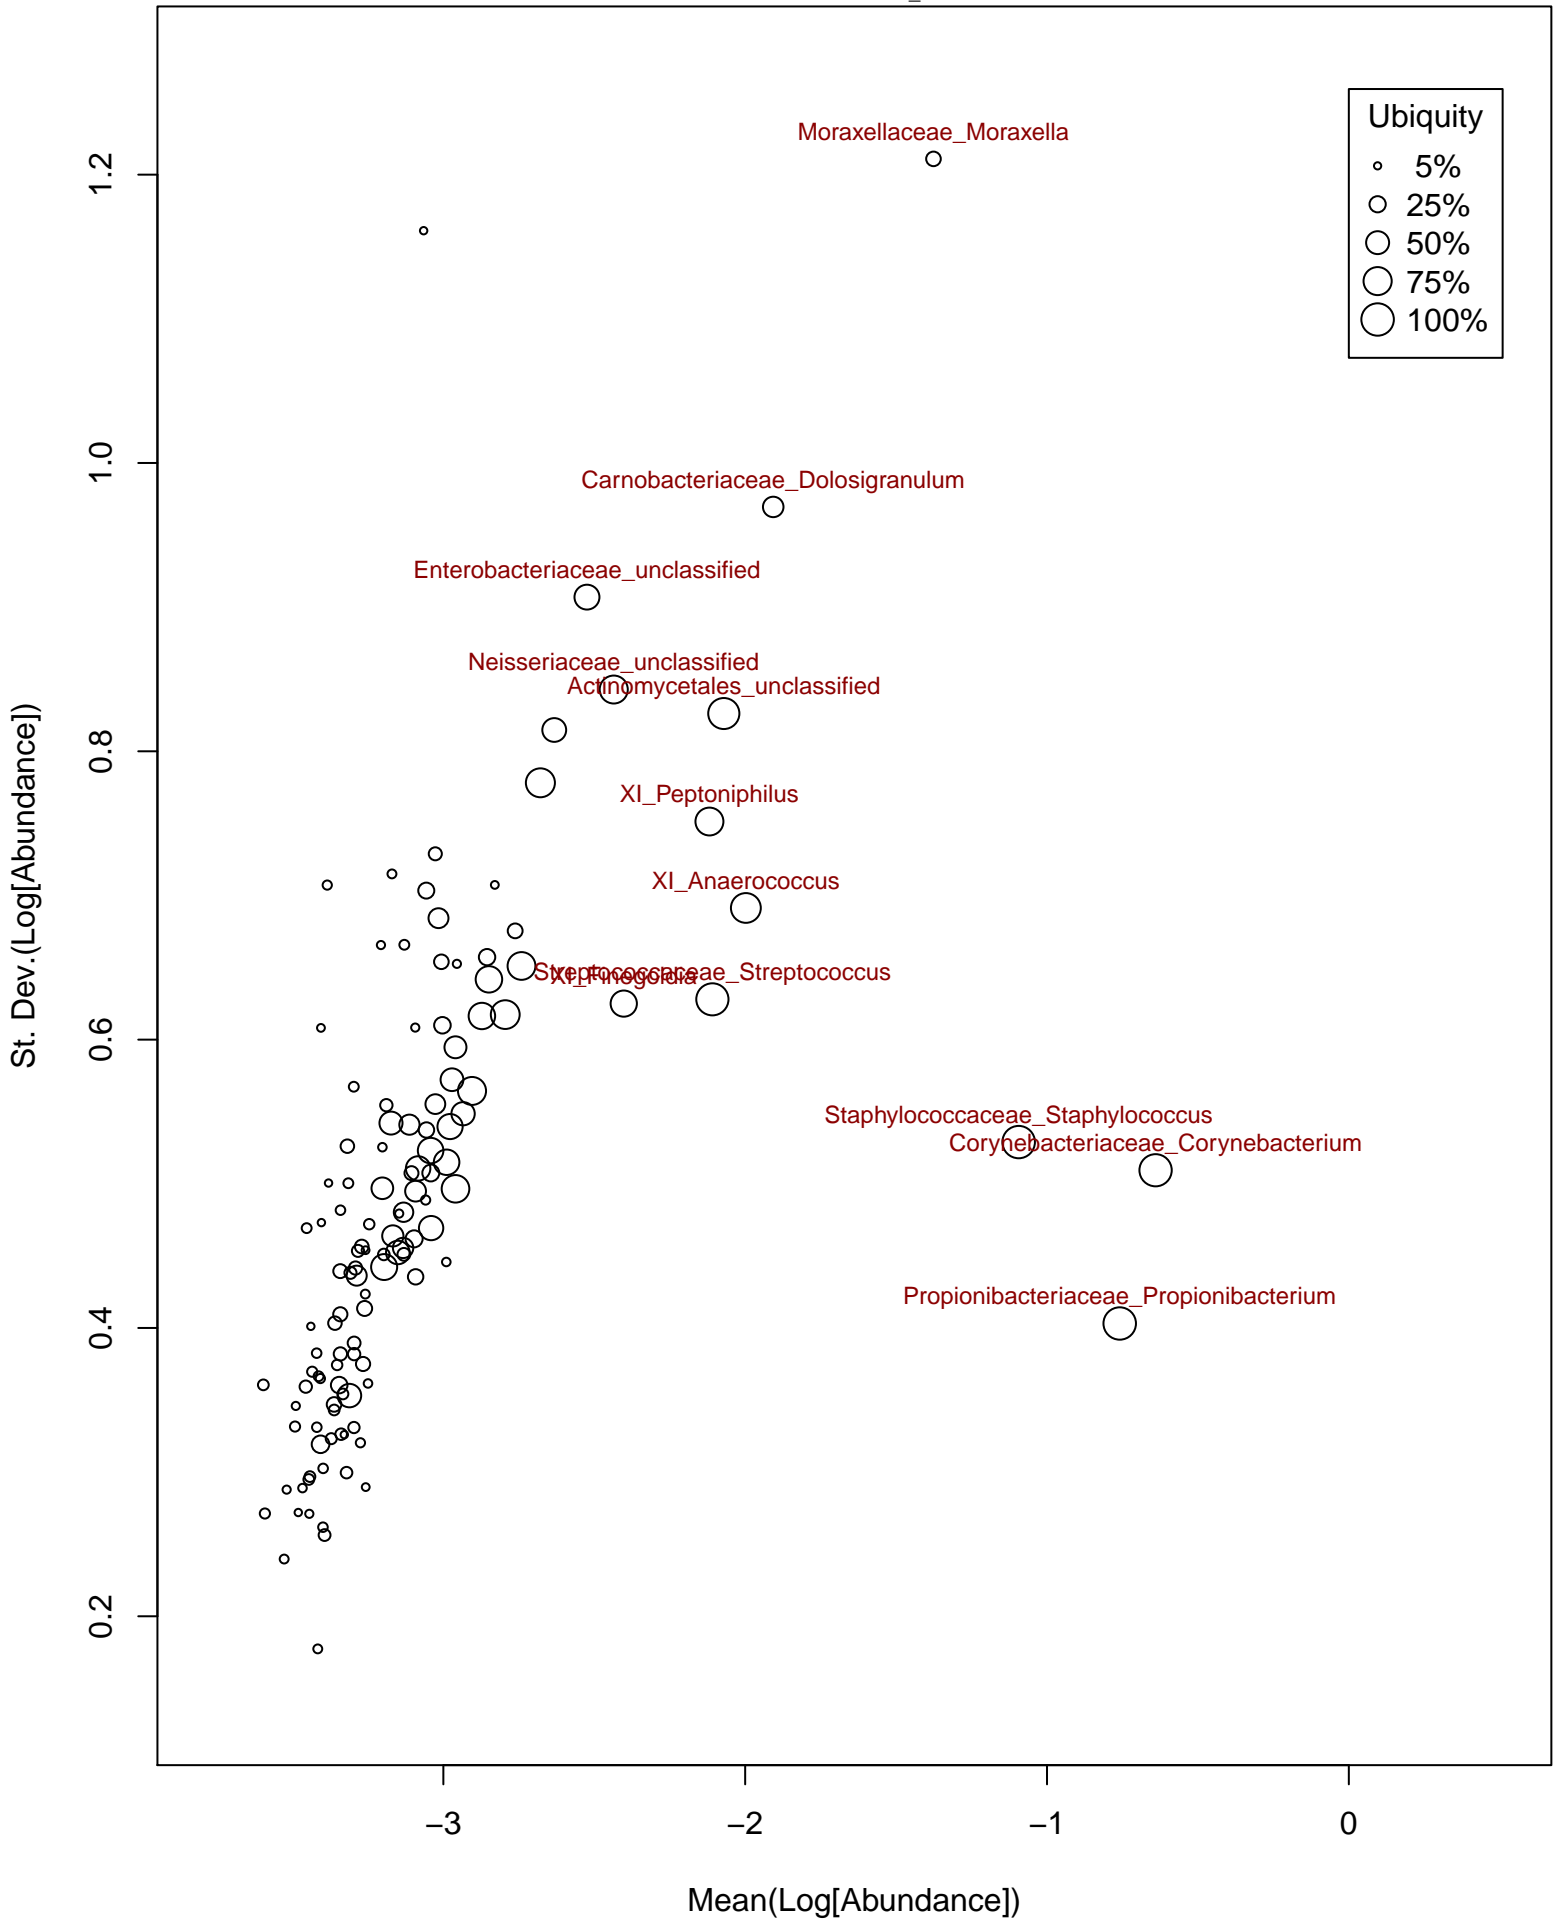

# Variation vs. Abundance

v35.Taxa.Buccal\_mucosa

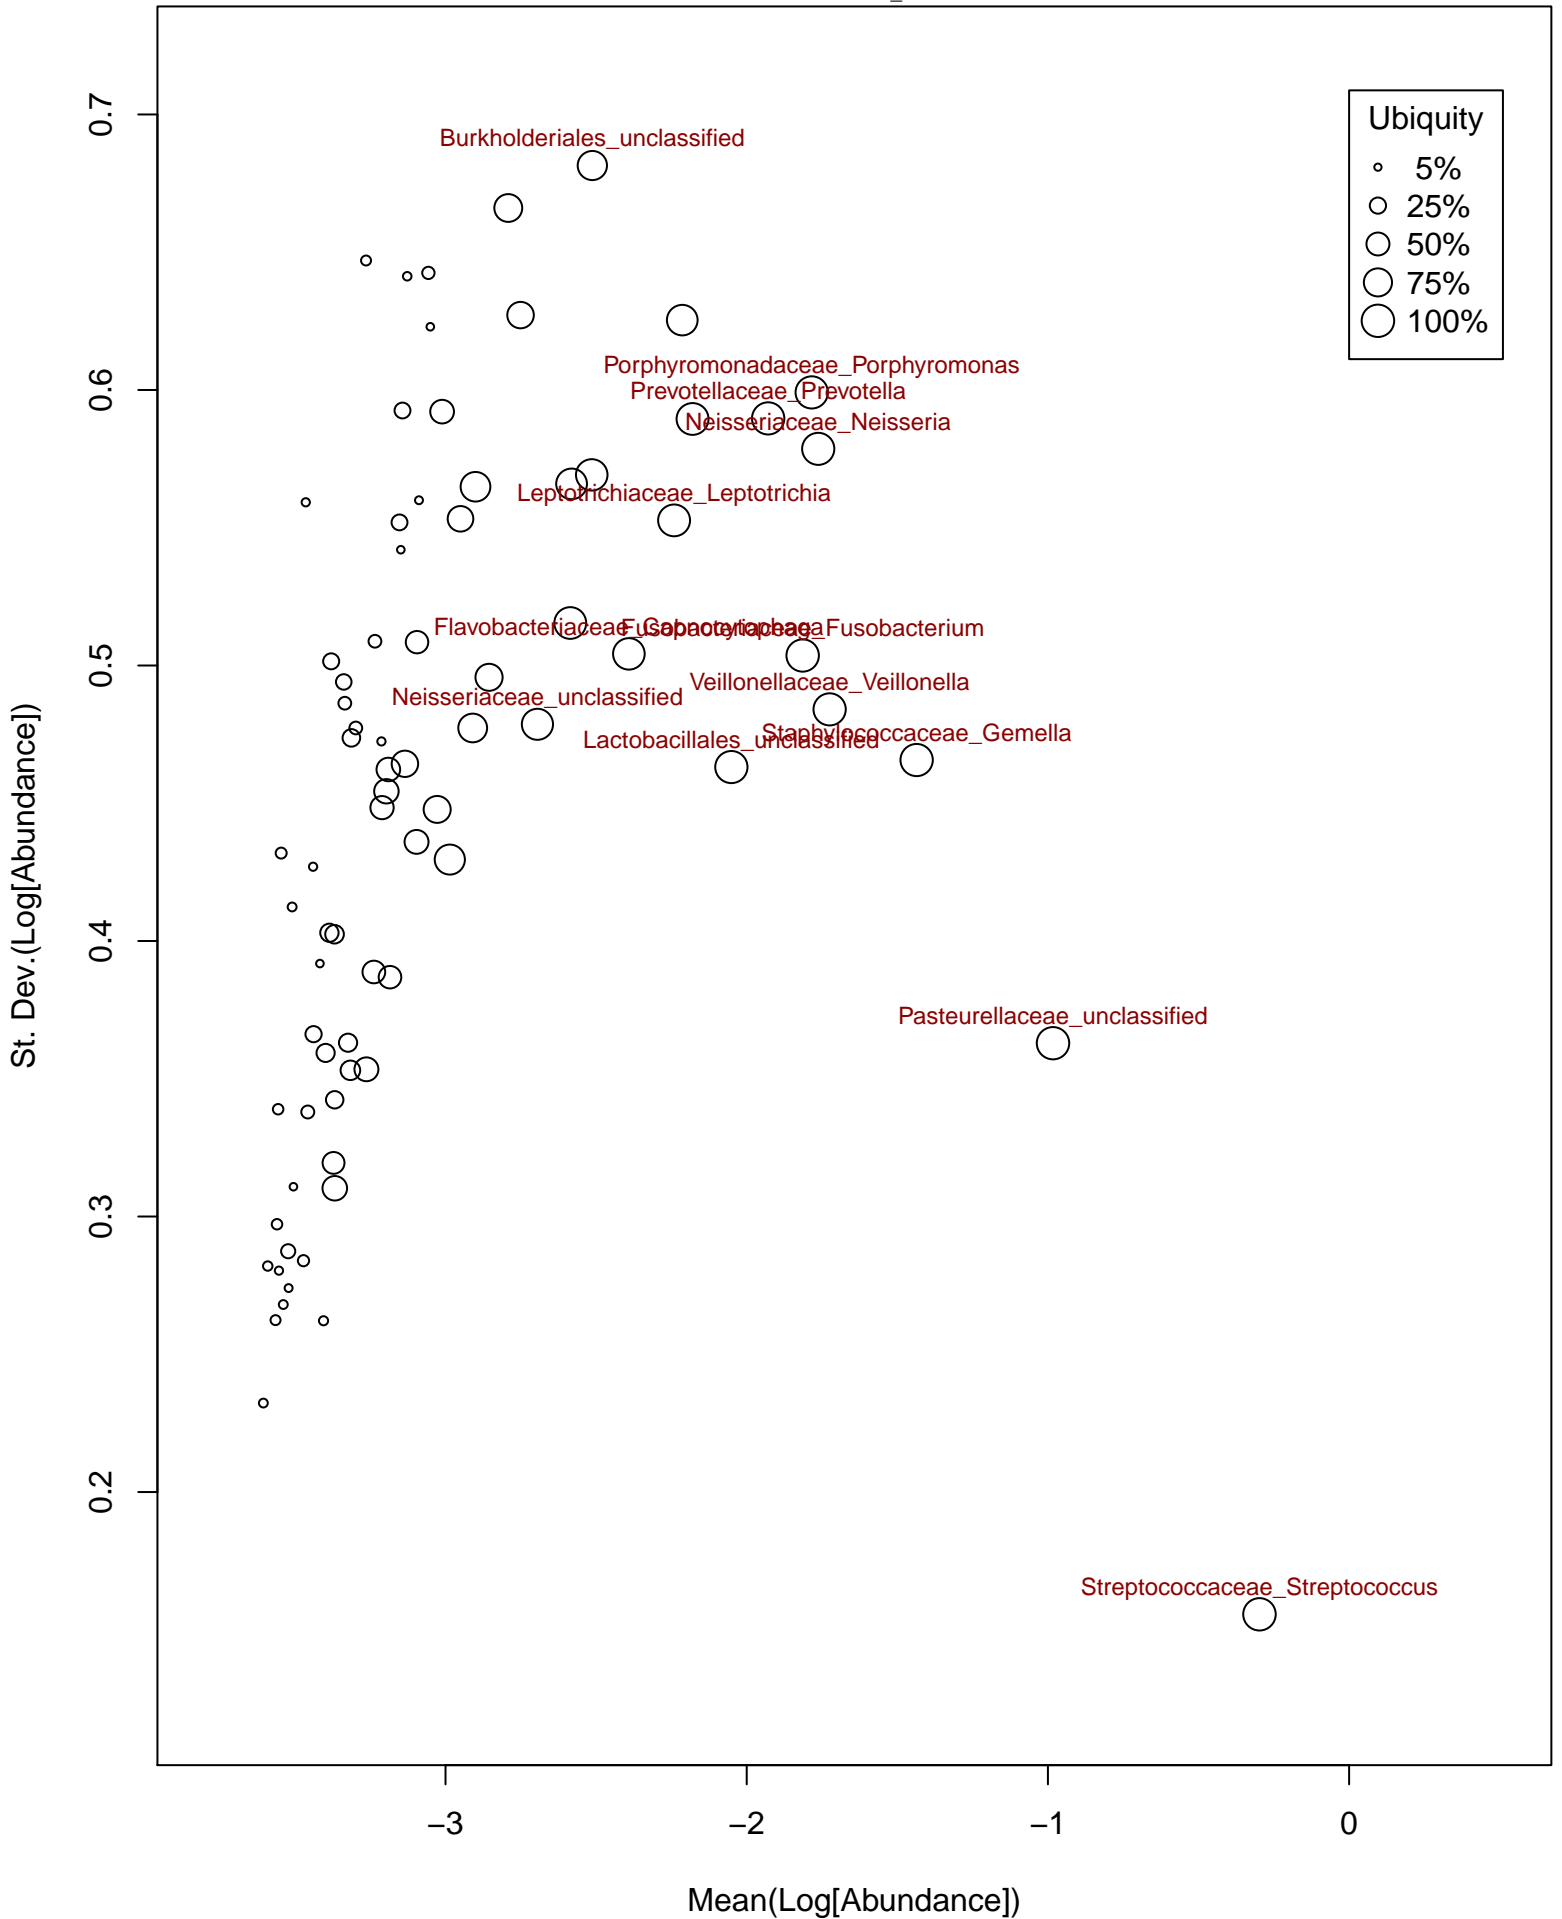

# Variation vs. Abundance

v35.Taxa.Hard\_palate

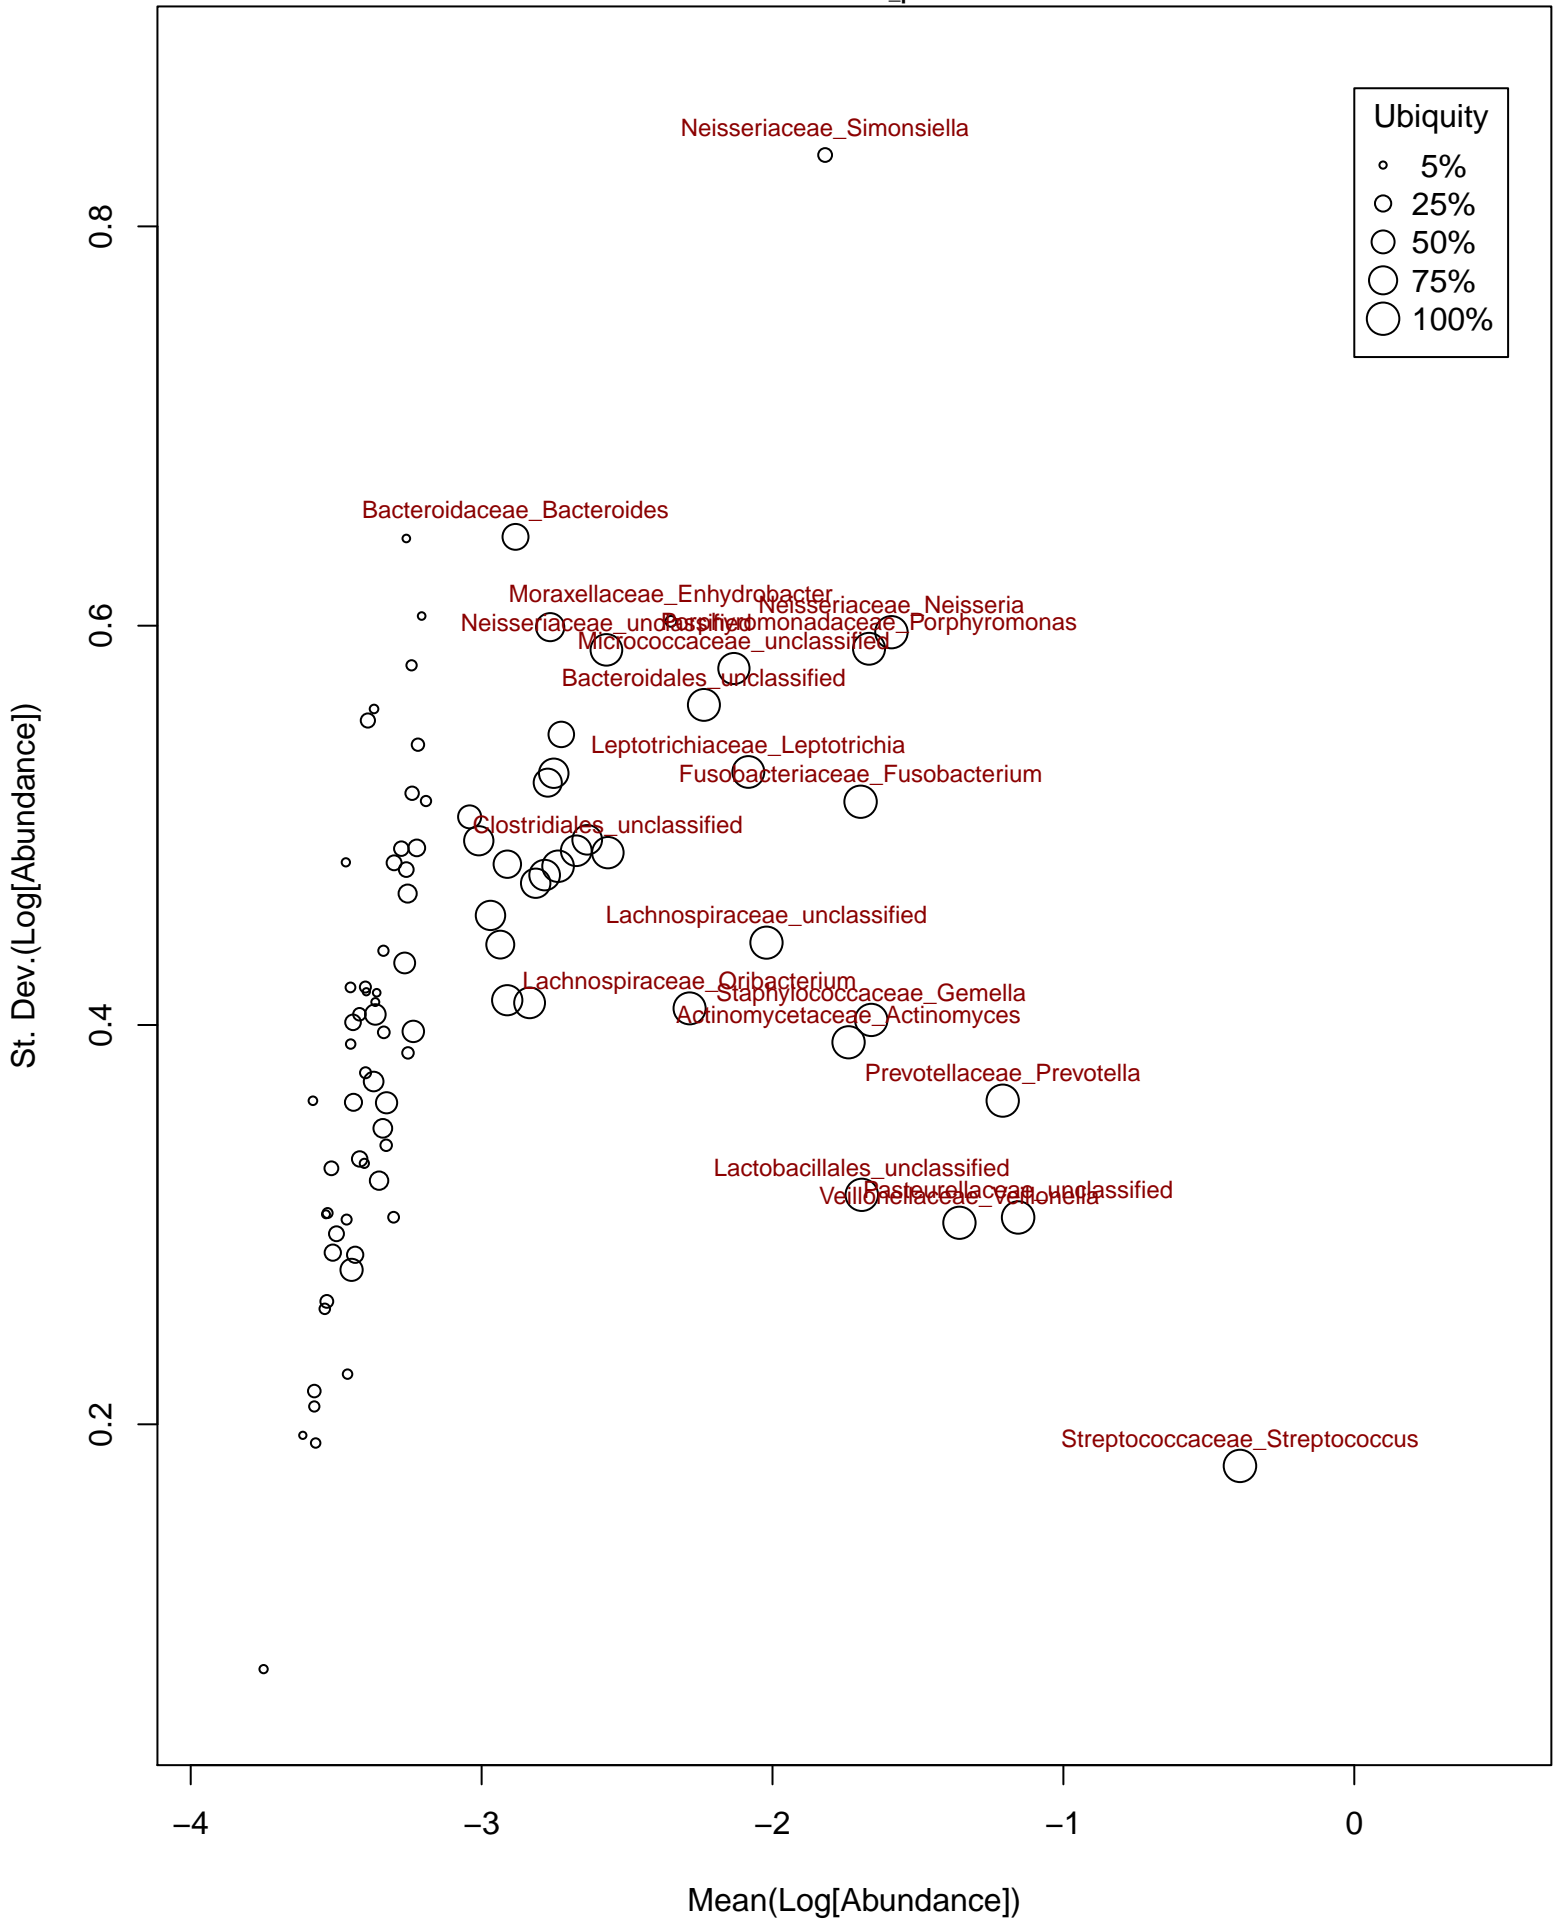

# Variation vs. Abundance

v35.Taxa.Keratinized\_gingiva

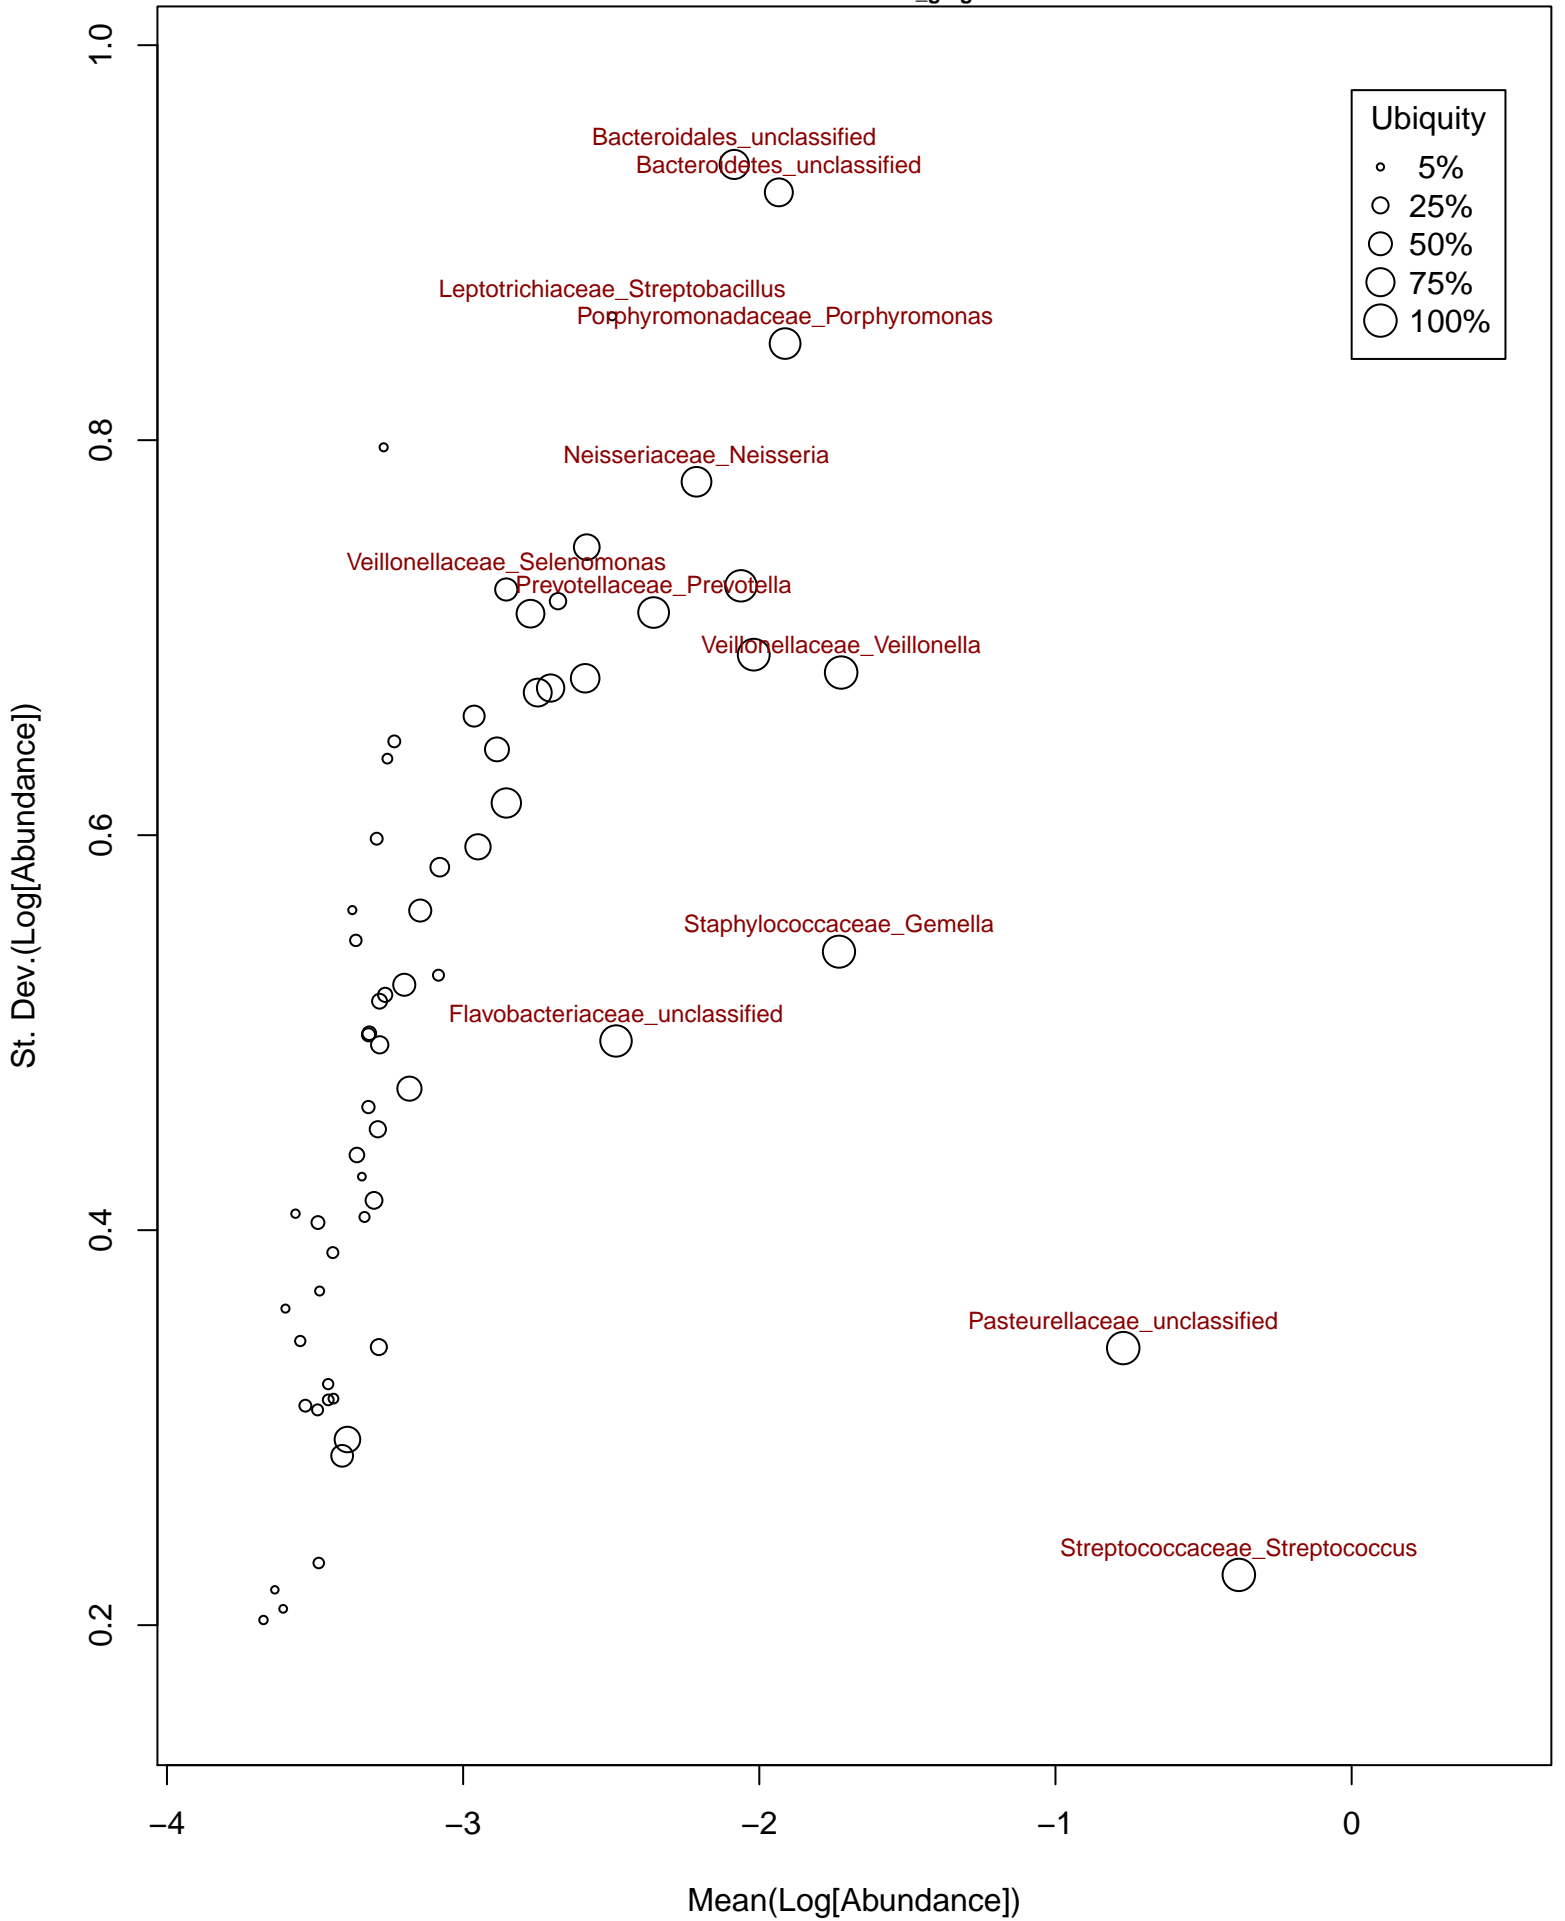

# Variation vs. Abundance

v35.Taxa.L\_Antecubital\_fossa

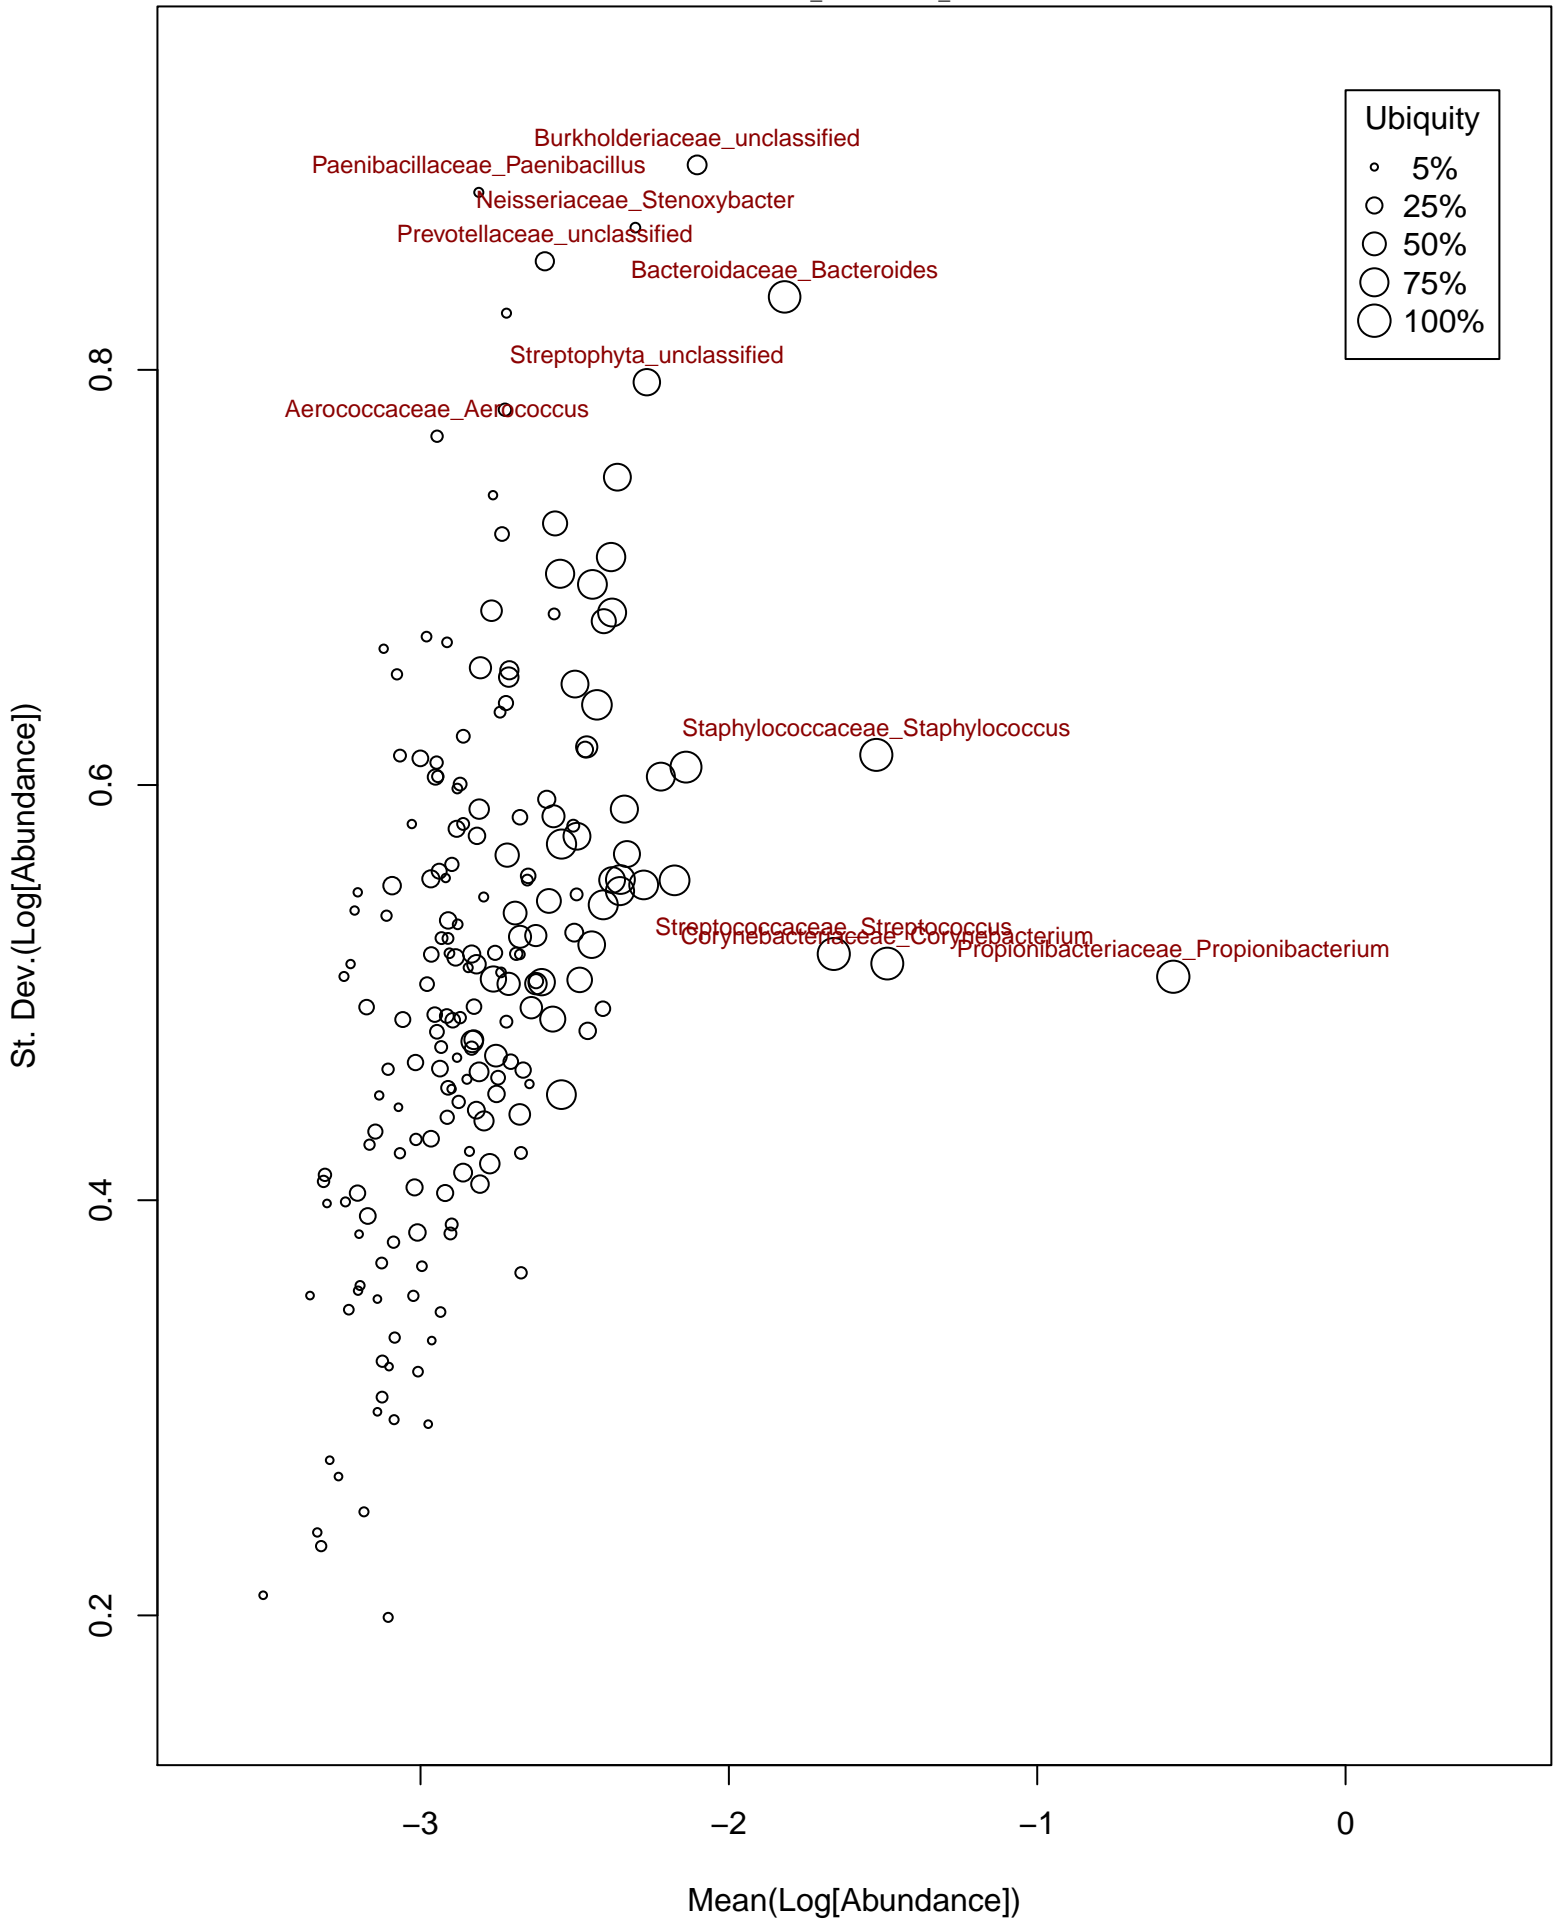

# Variation vs. Abundance

v35.Taxa.L\_Retroauricular\_crease

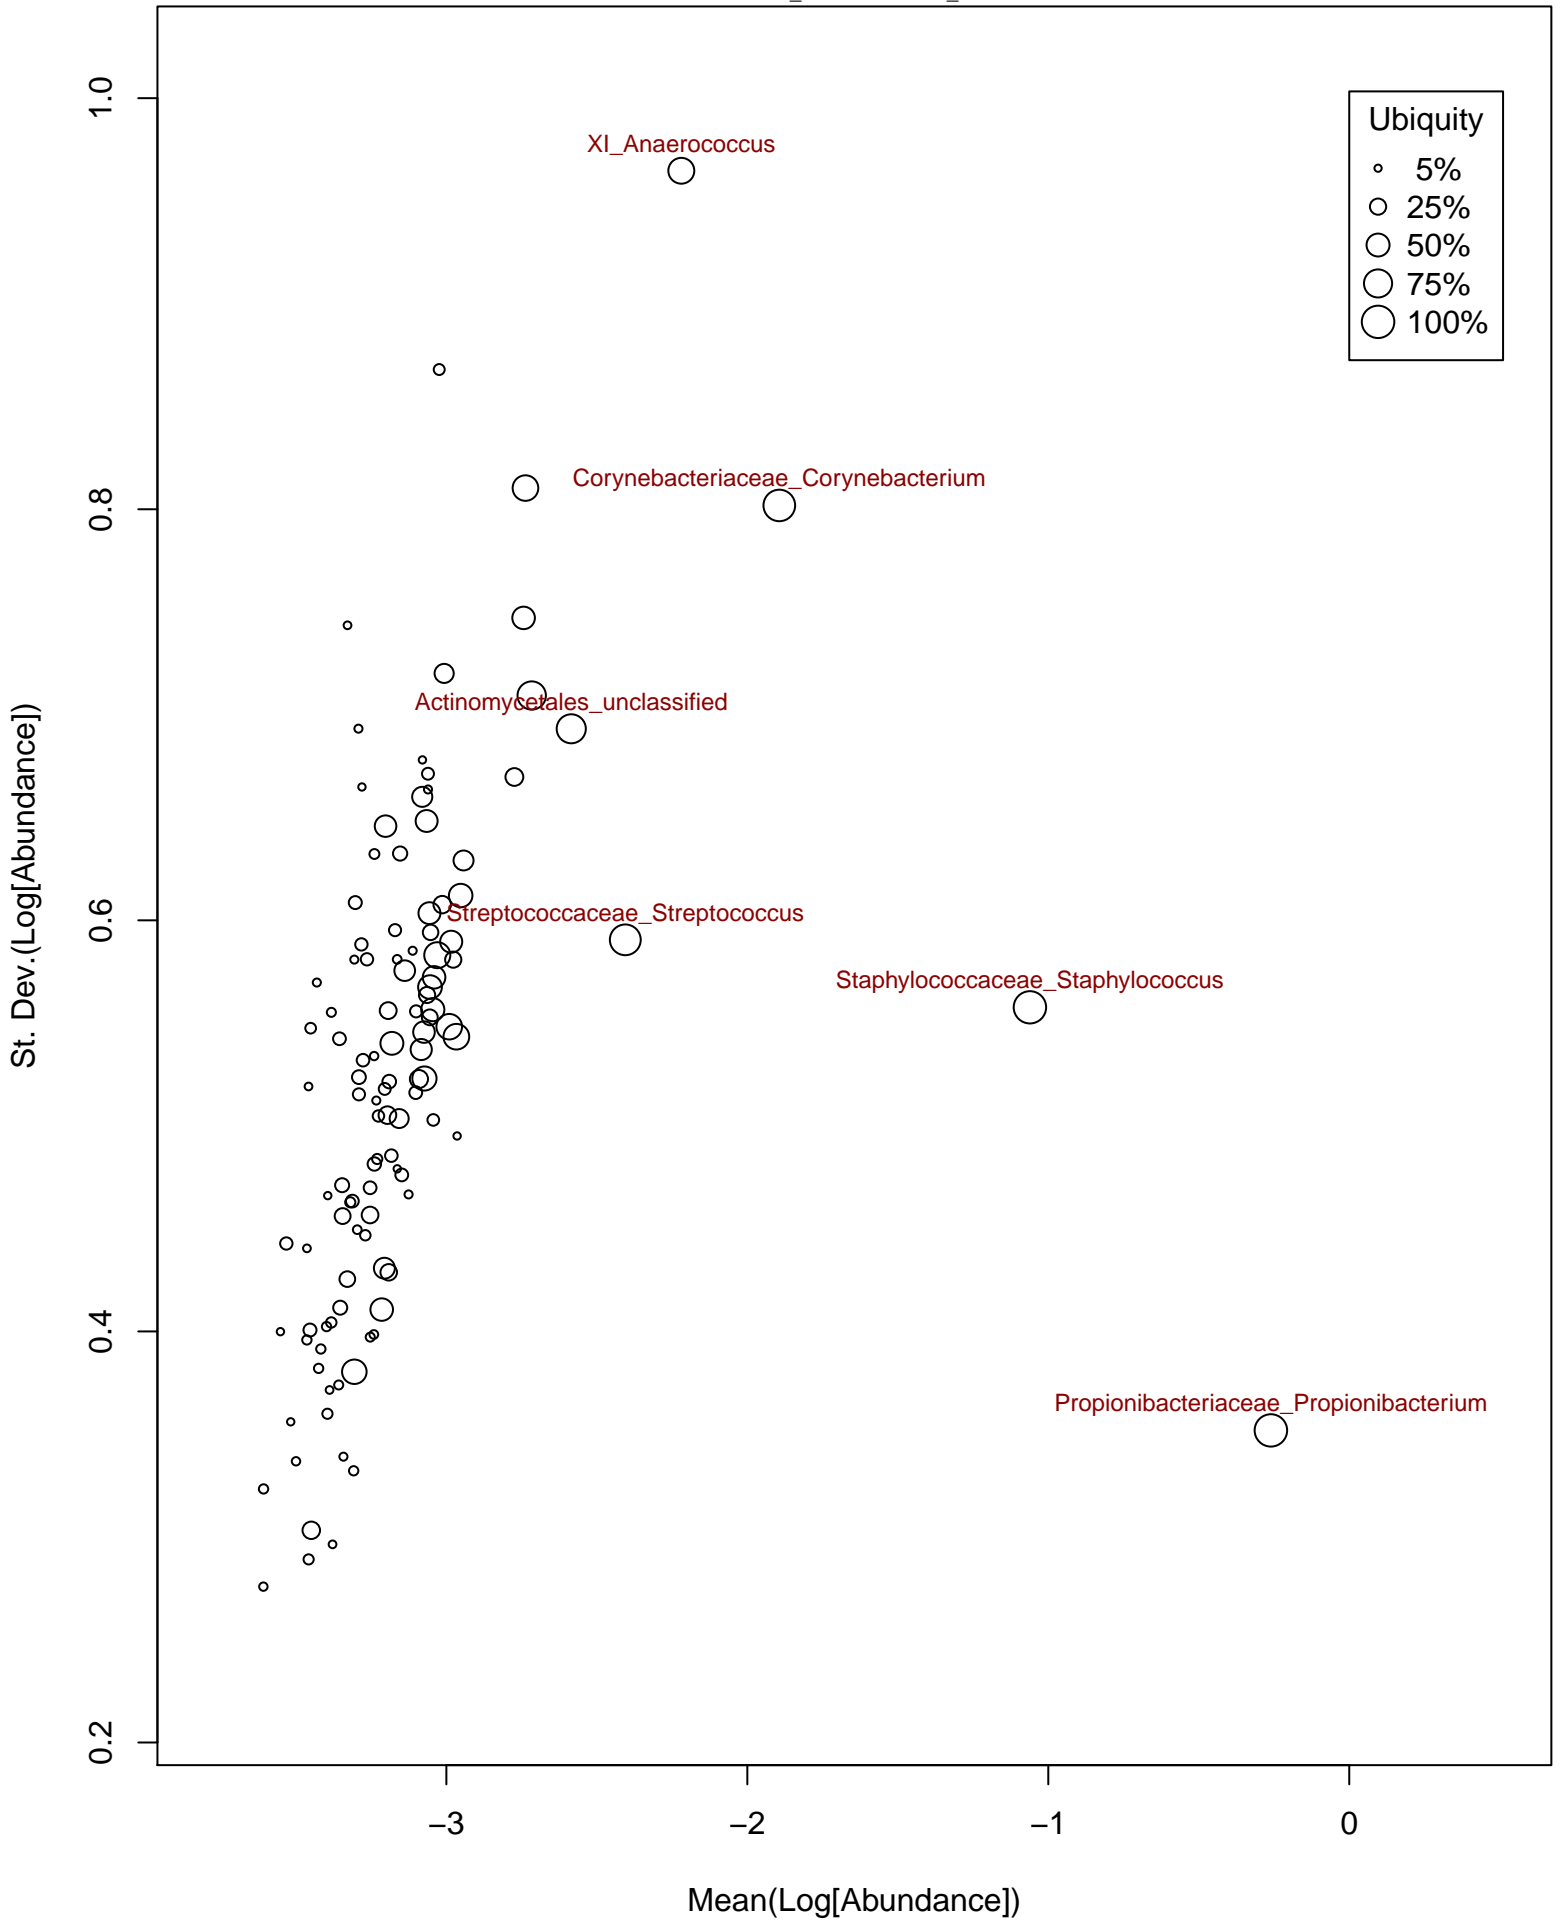

# Variation vs. Abundance

v35.Taxa.Mid\_vagina

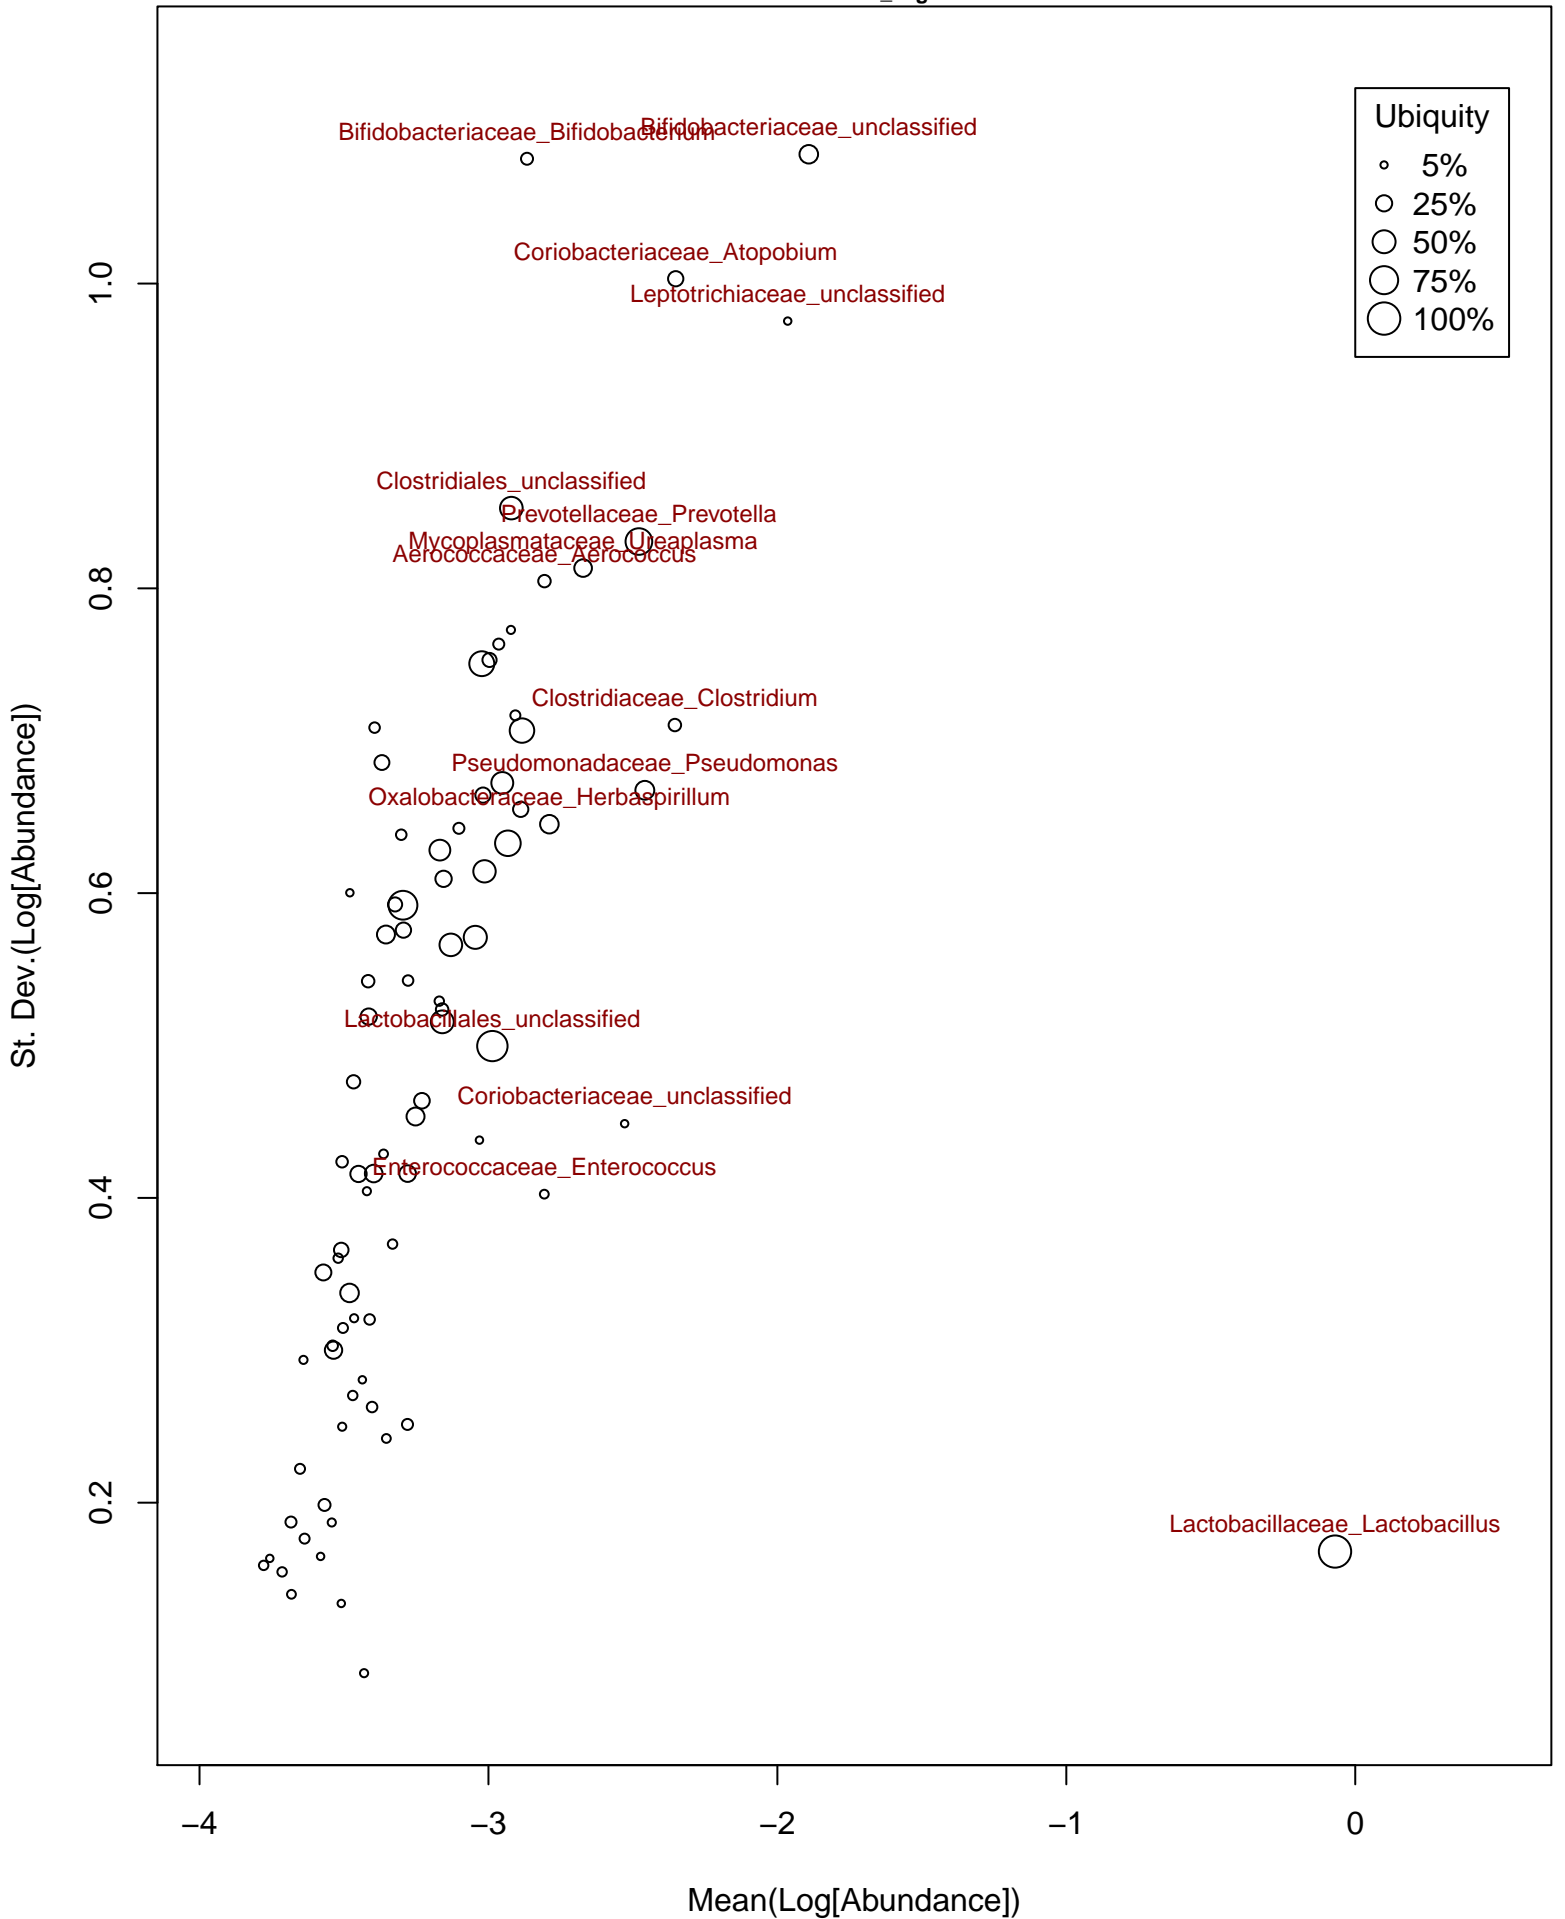

# Variation vs. Abundance

v35.Taxa.Palatine\_Tonsils

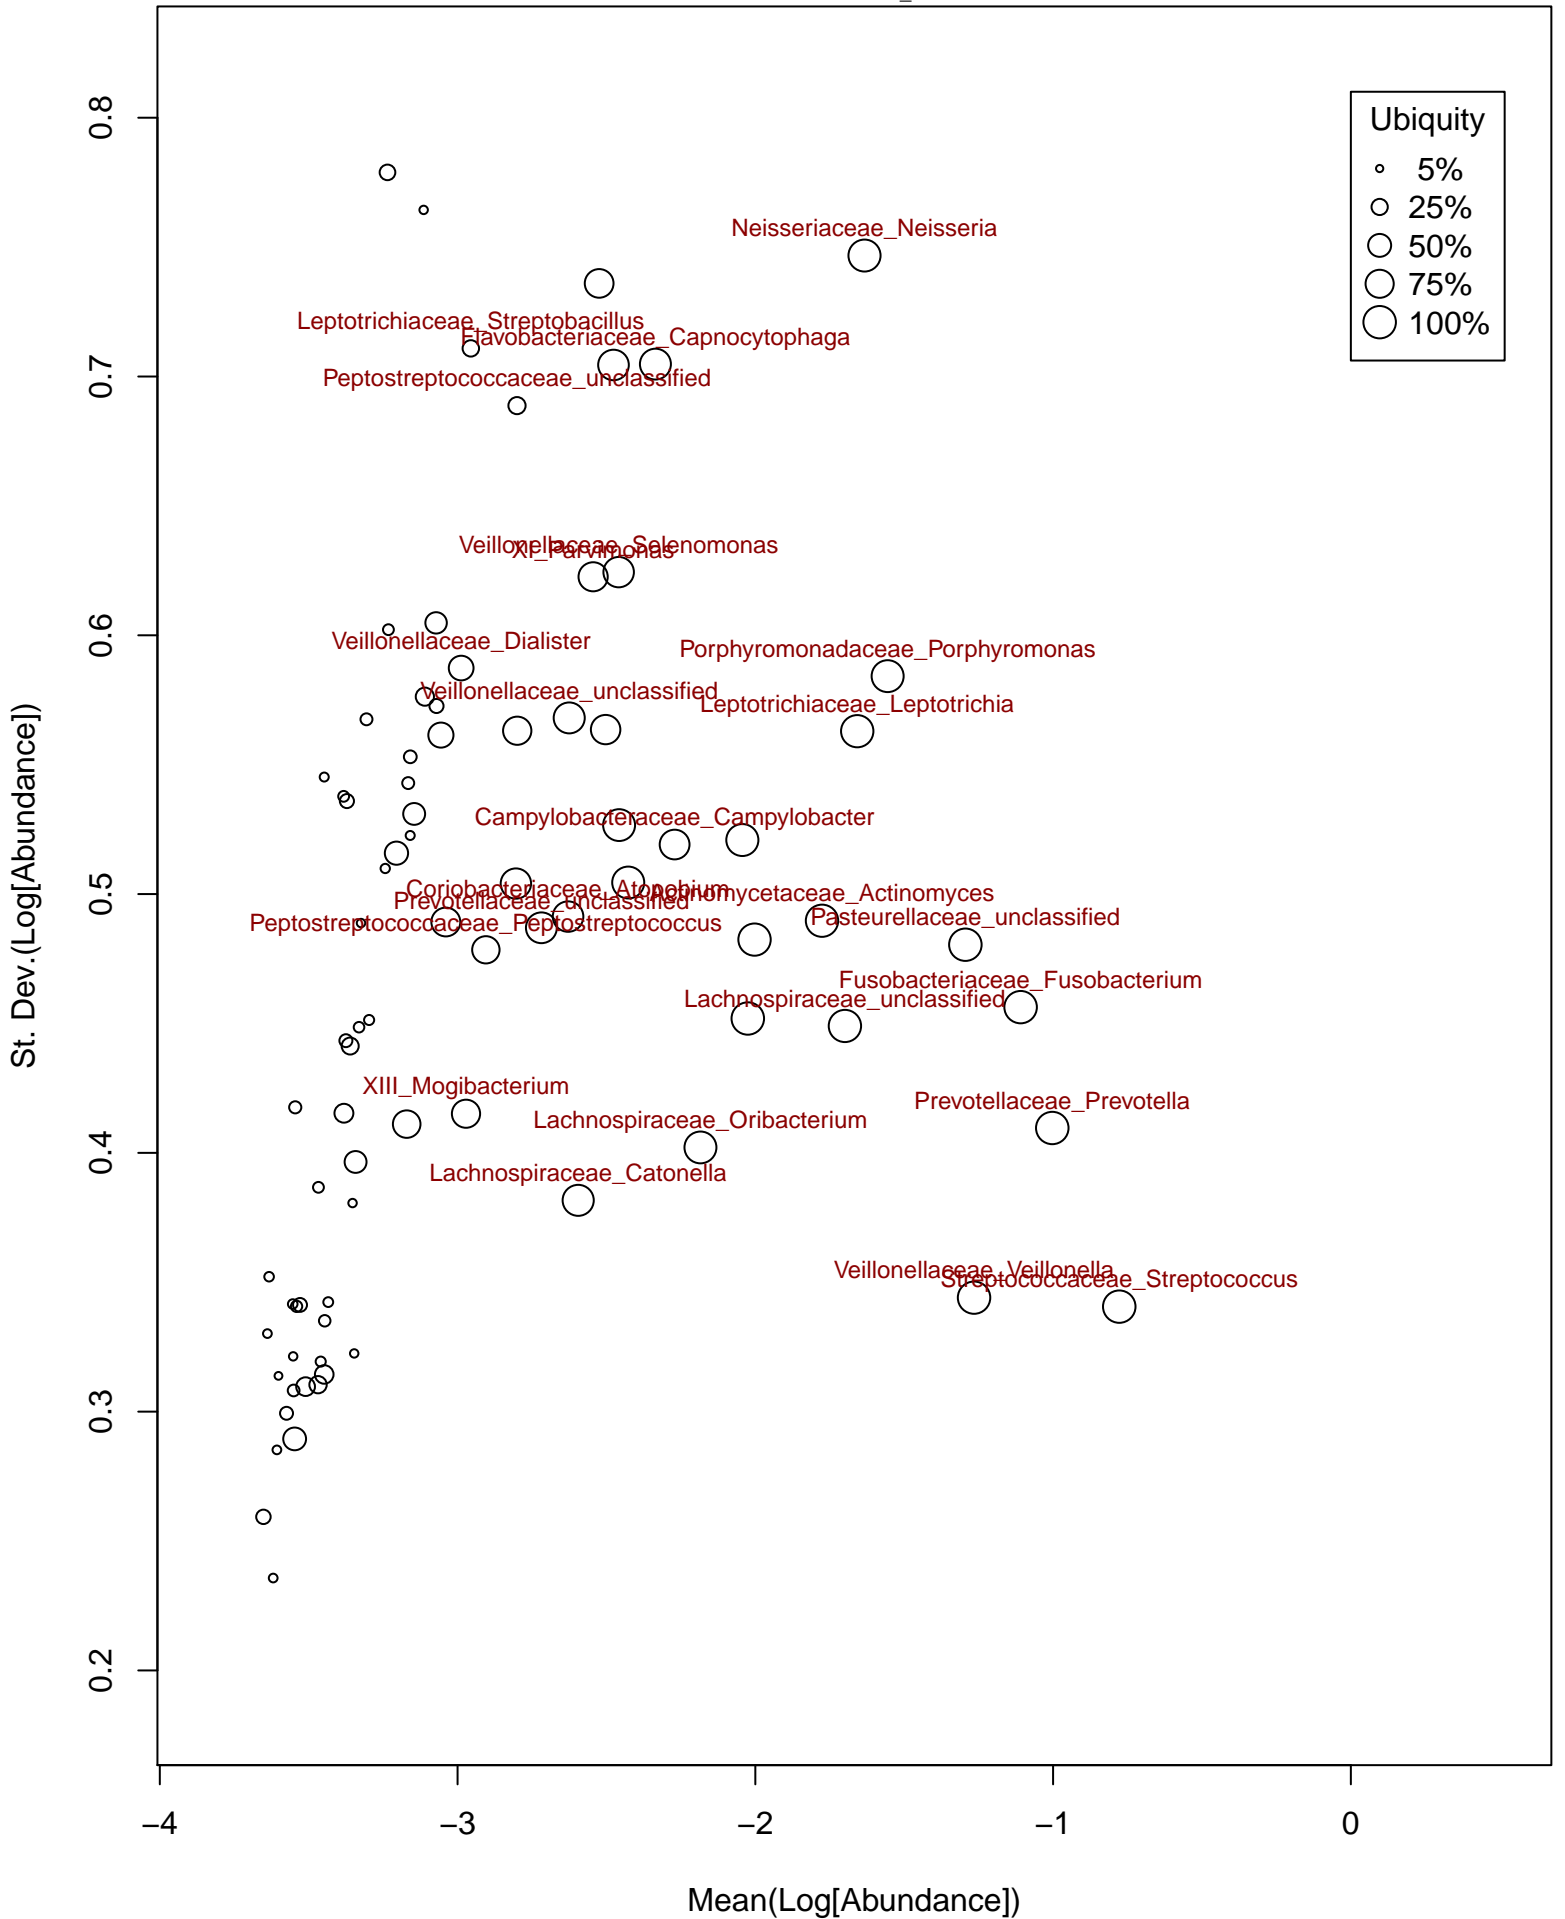



# Variation vs. Abundance

v35.Taxa.Posterior\_fornix

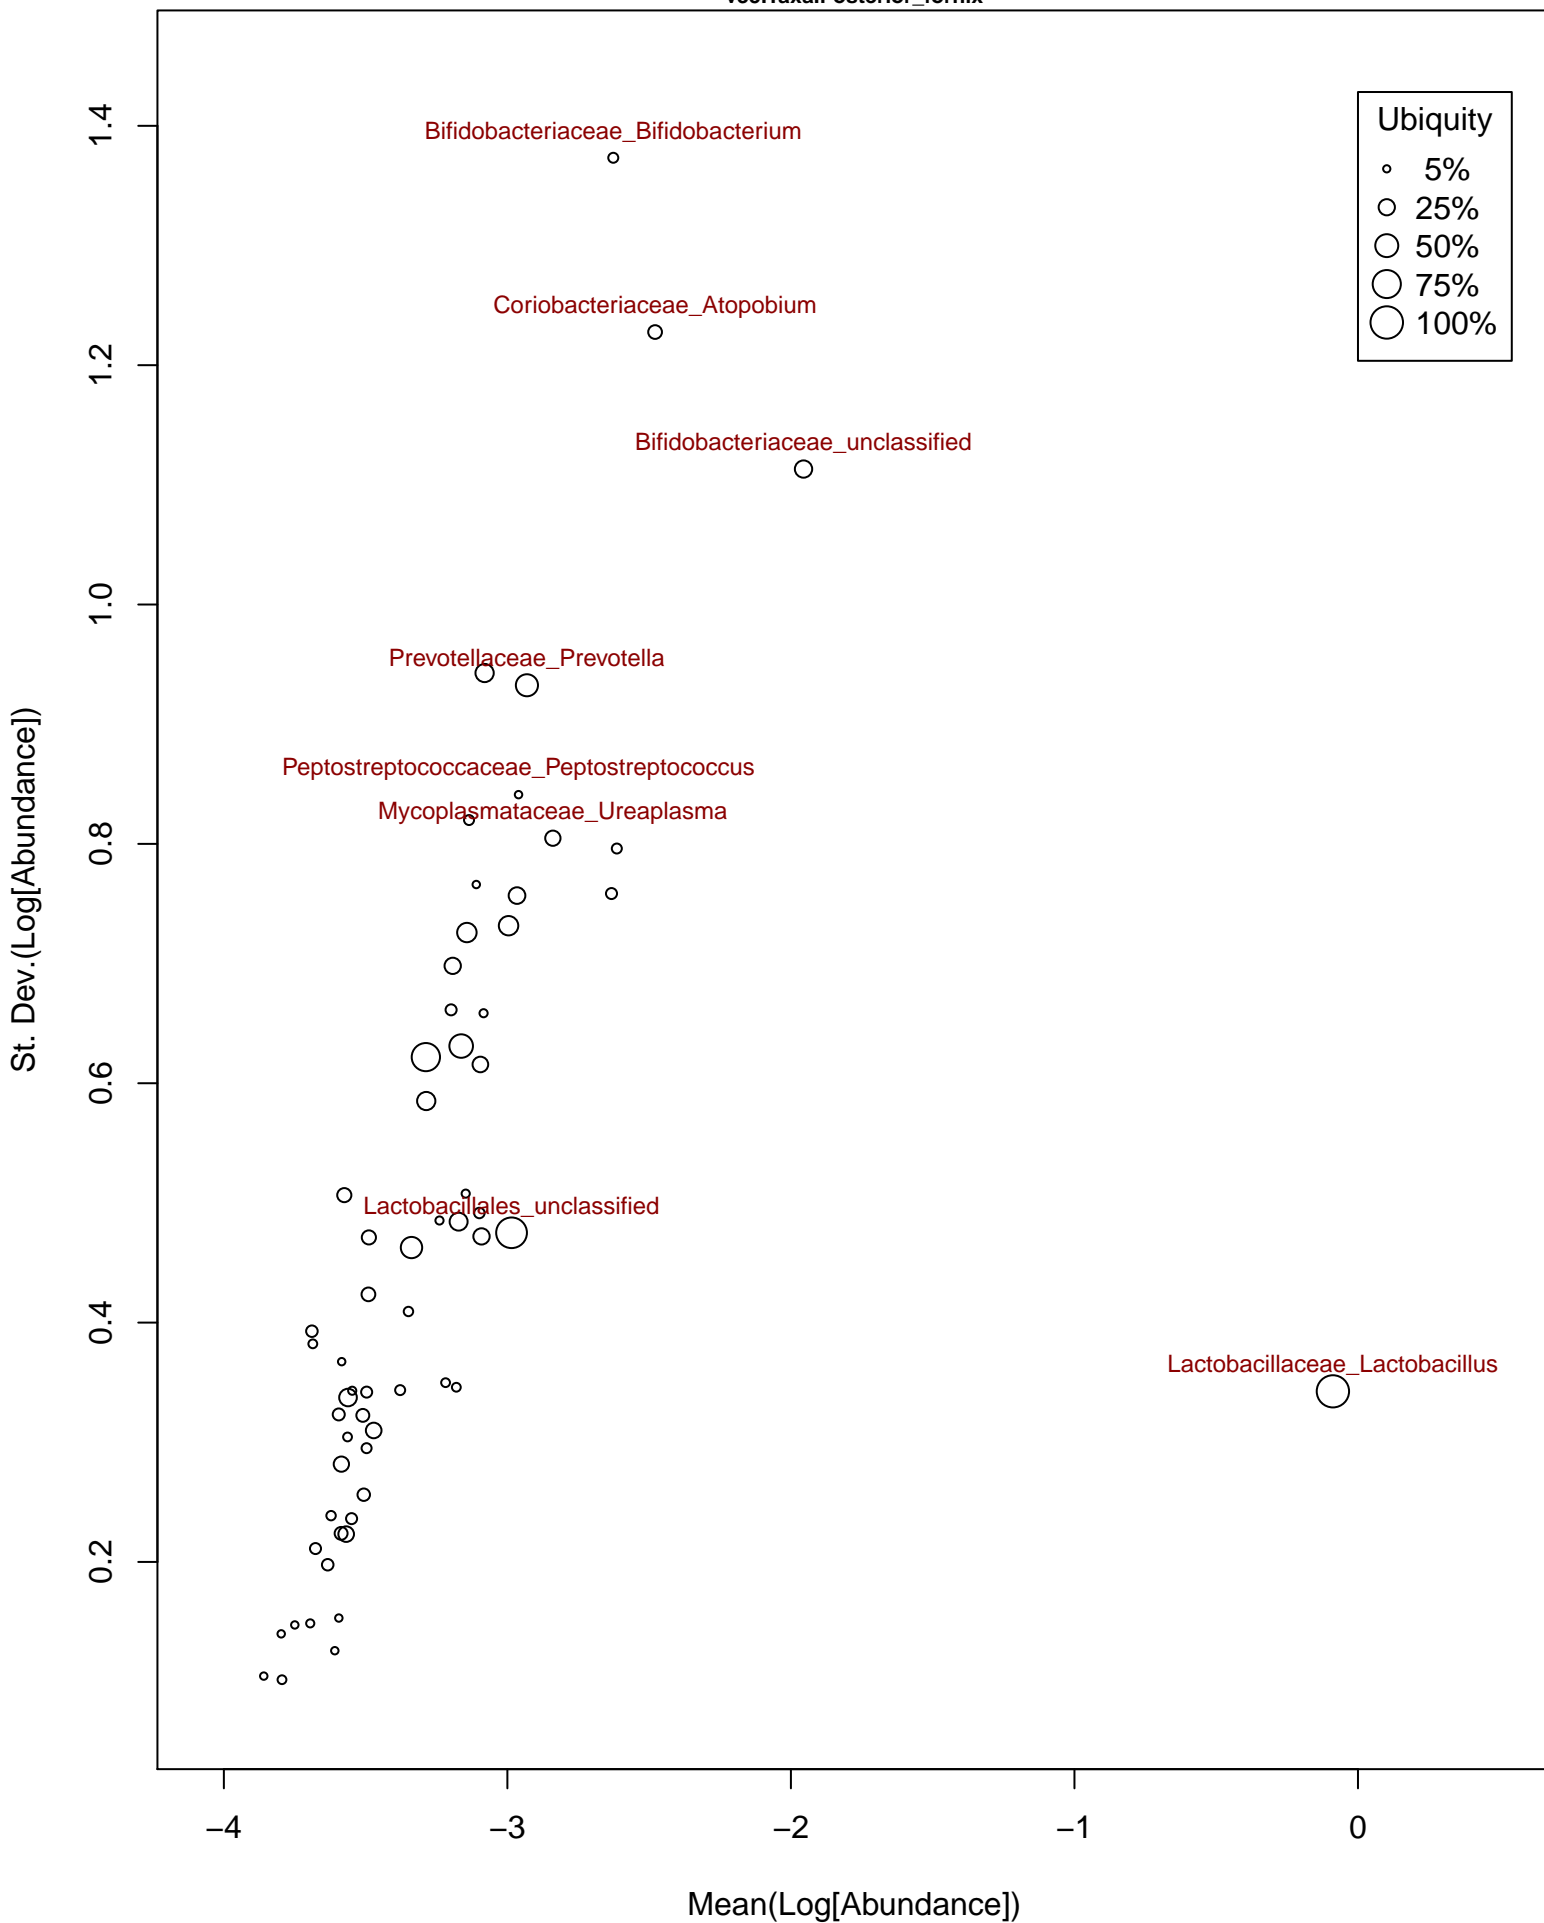

# Variation vs. Abundance

v35.Taxa.R\_Antecubital\_fossa

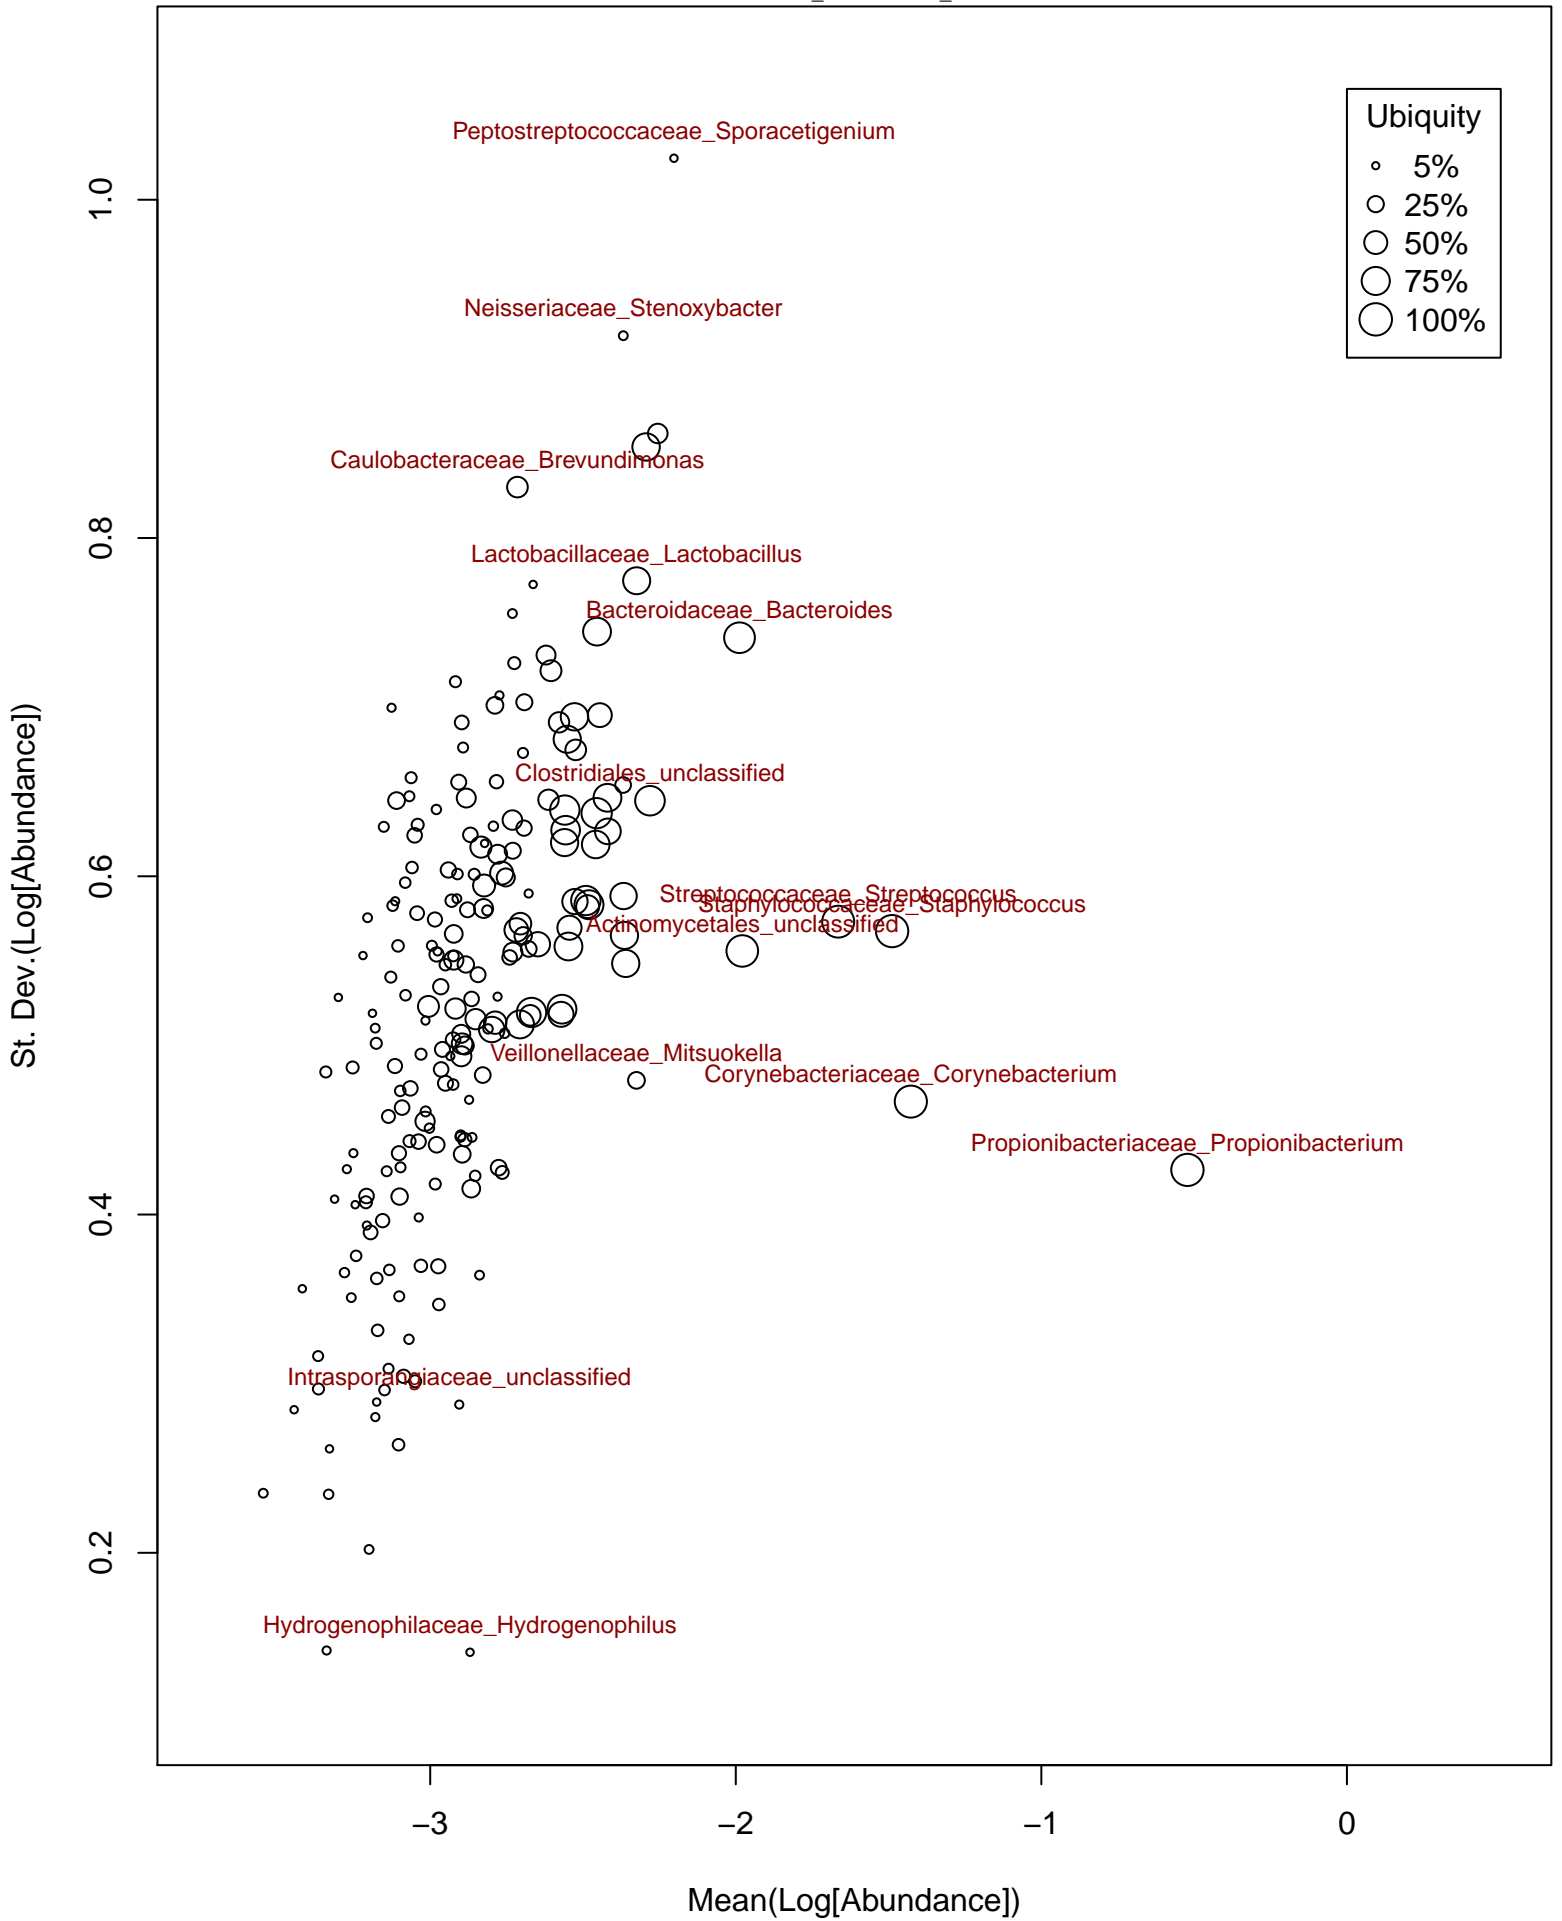

# Variation vs. Abundance

v35.Taxa.R\_Retroauricular\_crease

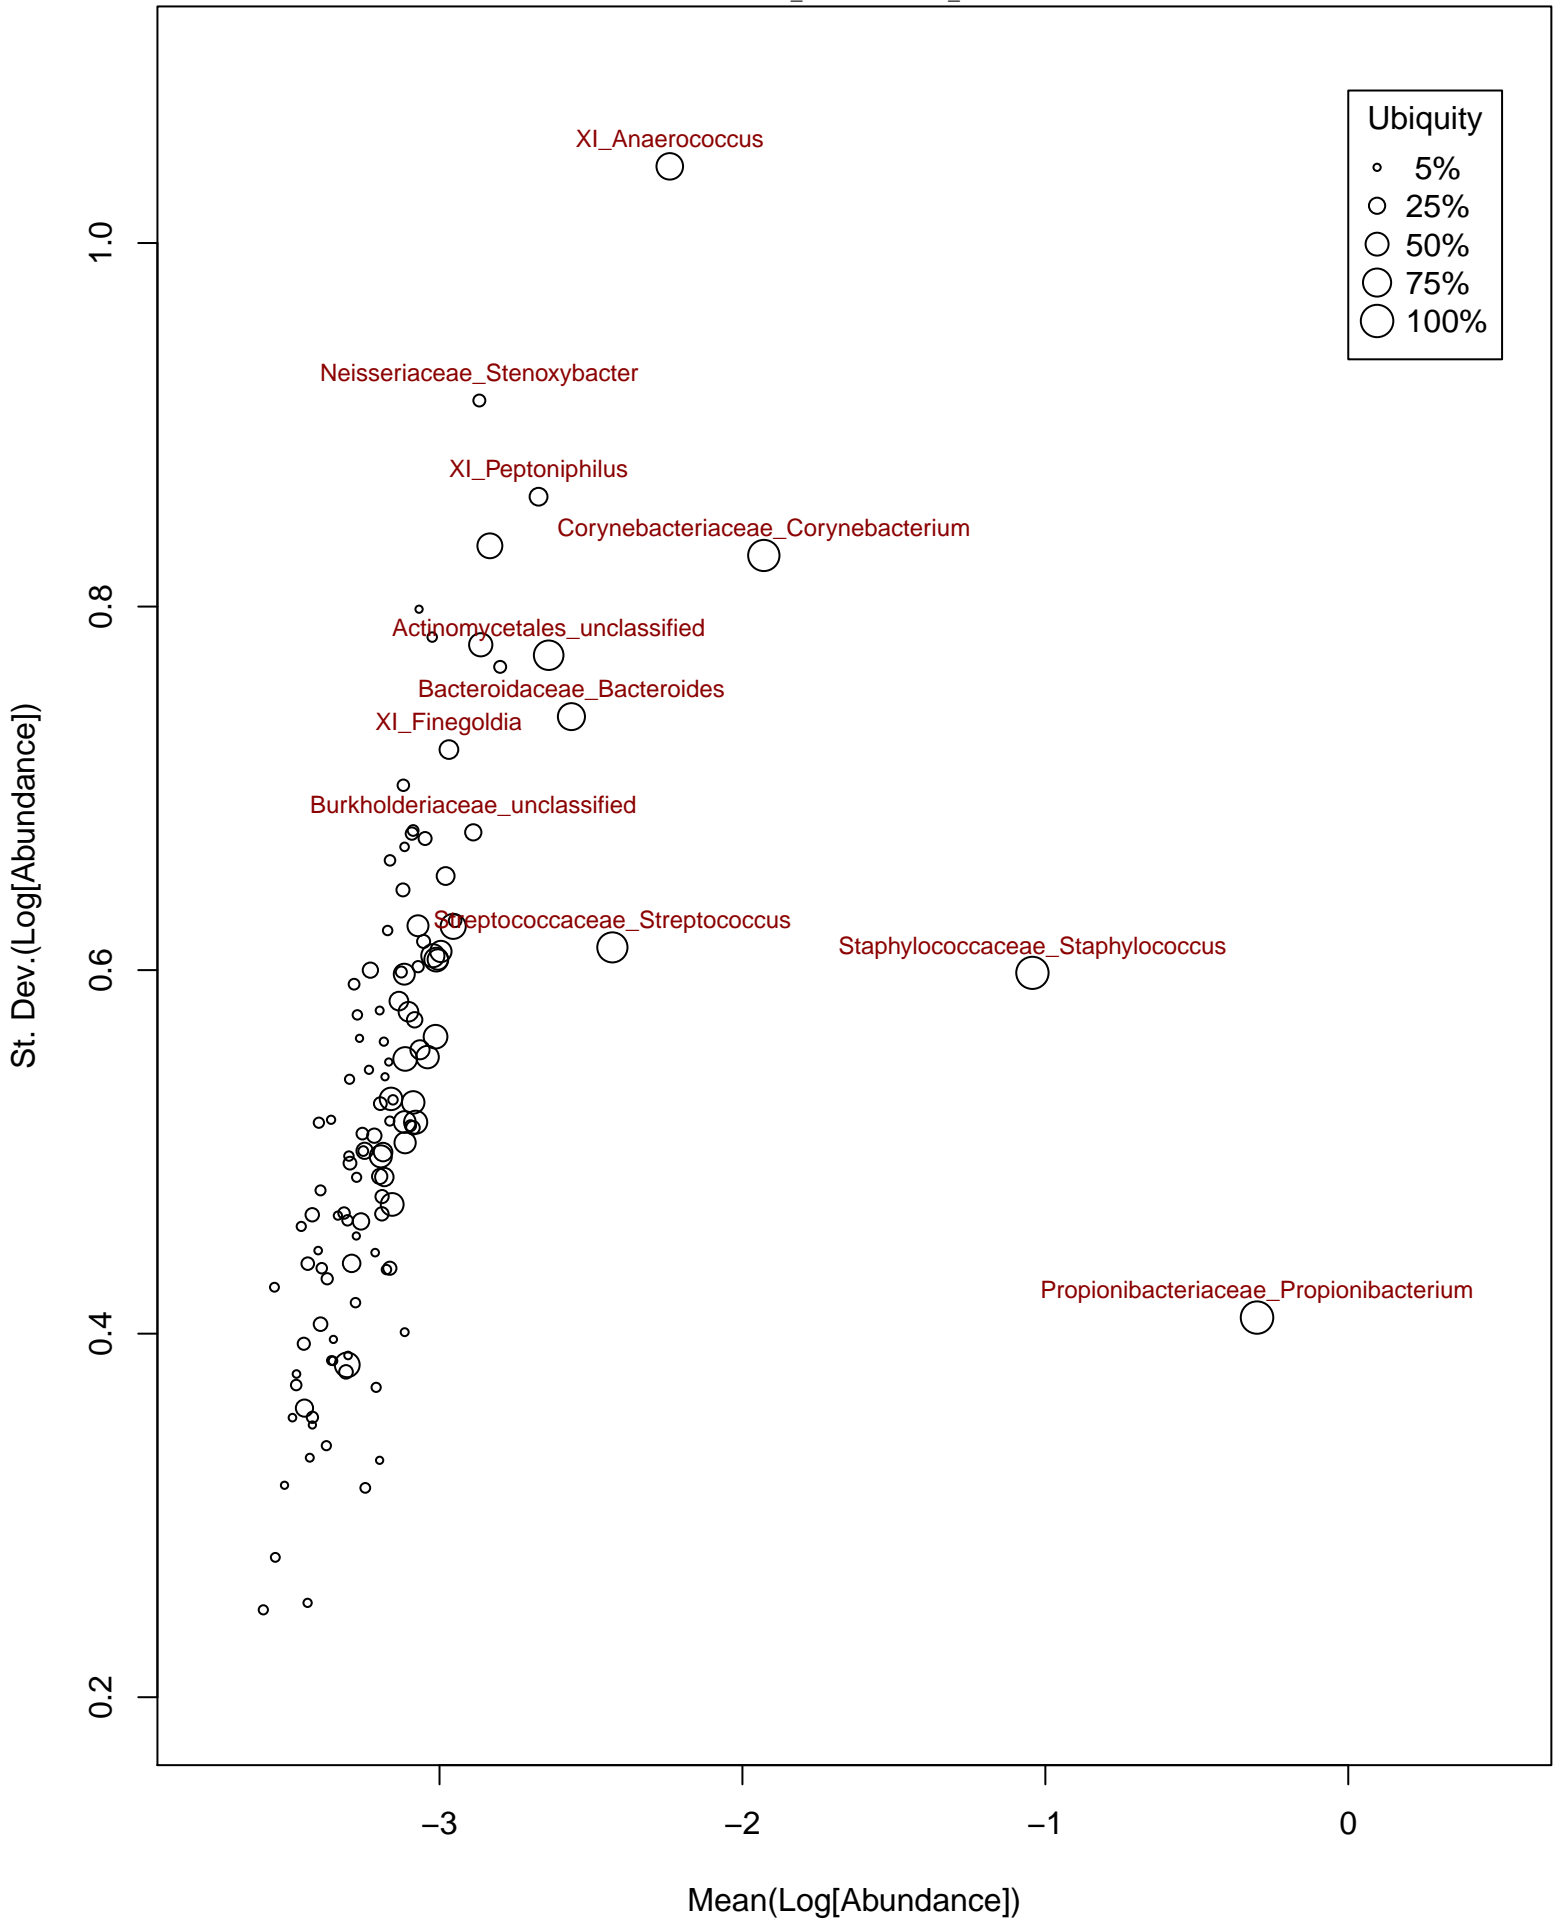

# Variation vs. Abundance

v35.Taxa.Saliva

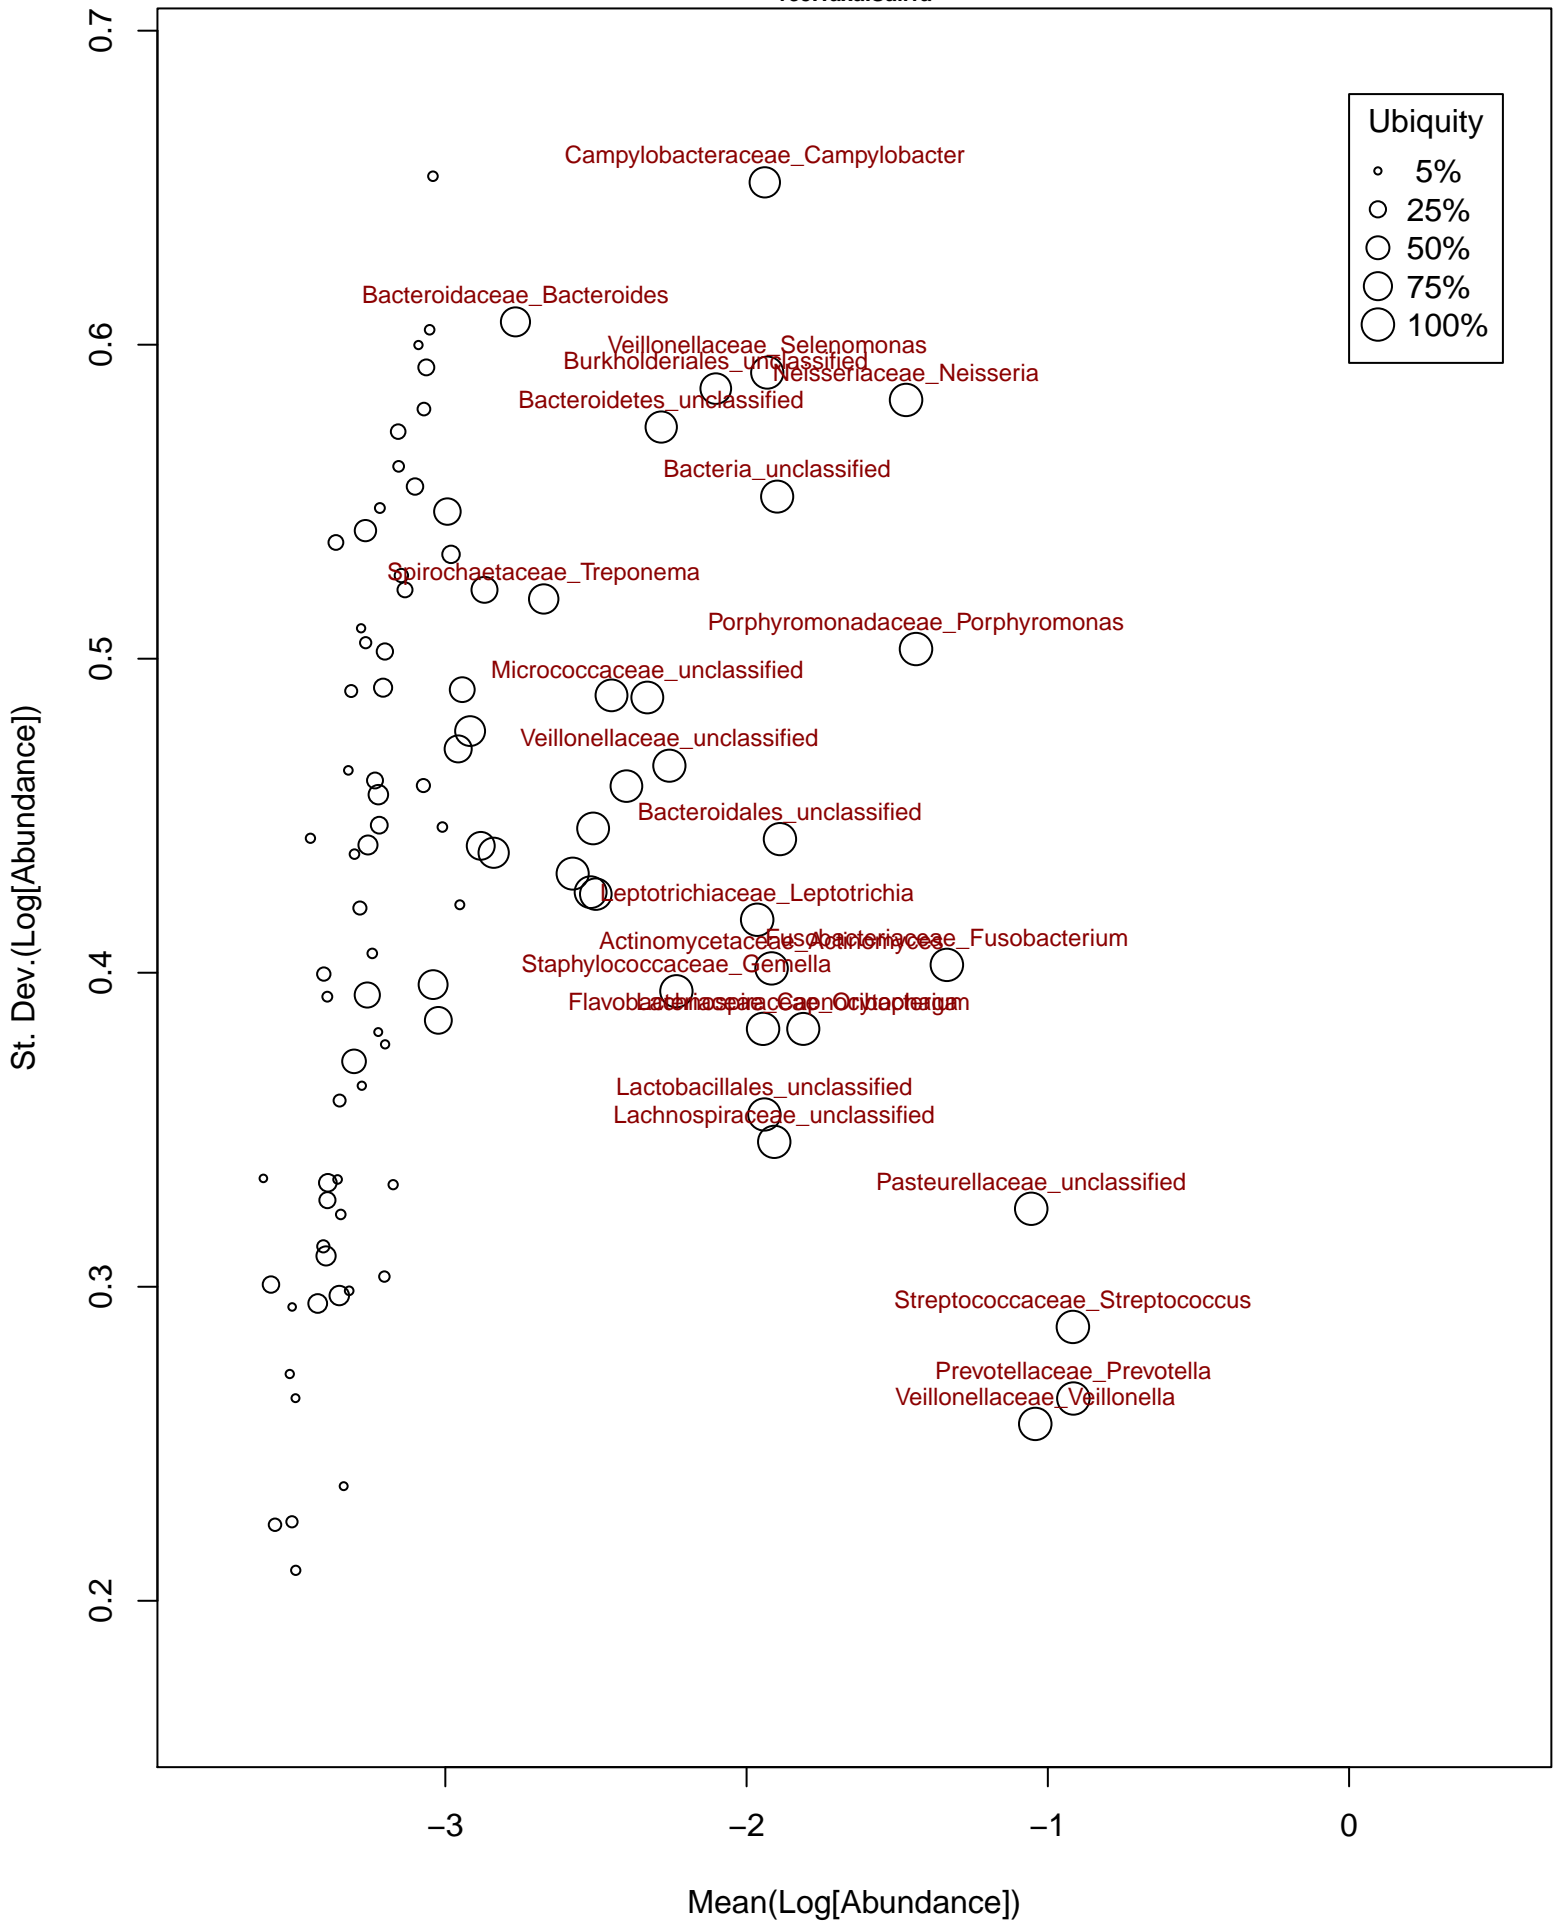



# Variation vs. Abundance

v35.Taxa.Subgingival\_plaque

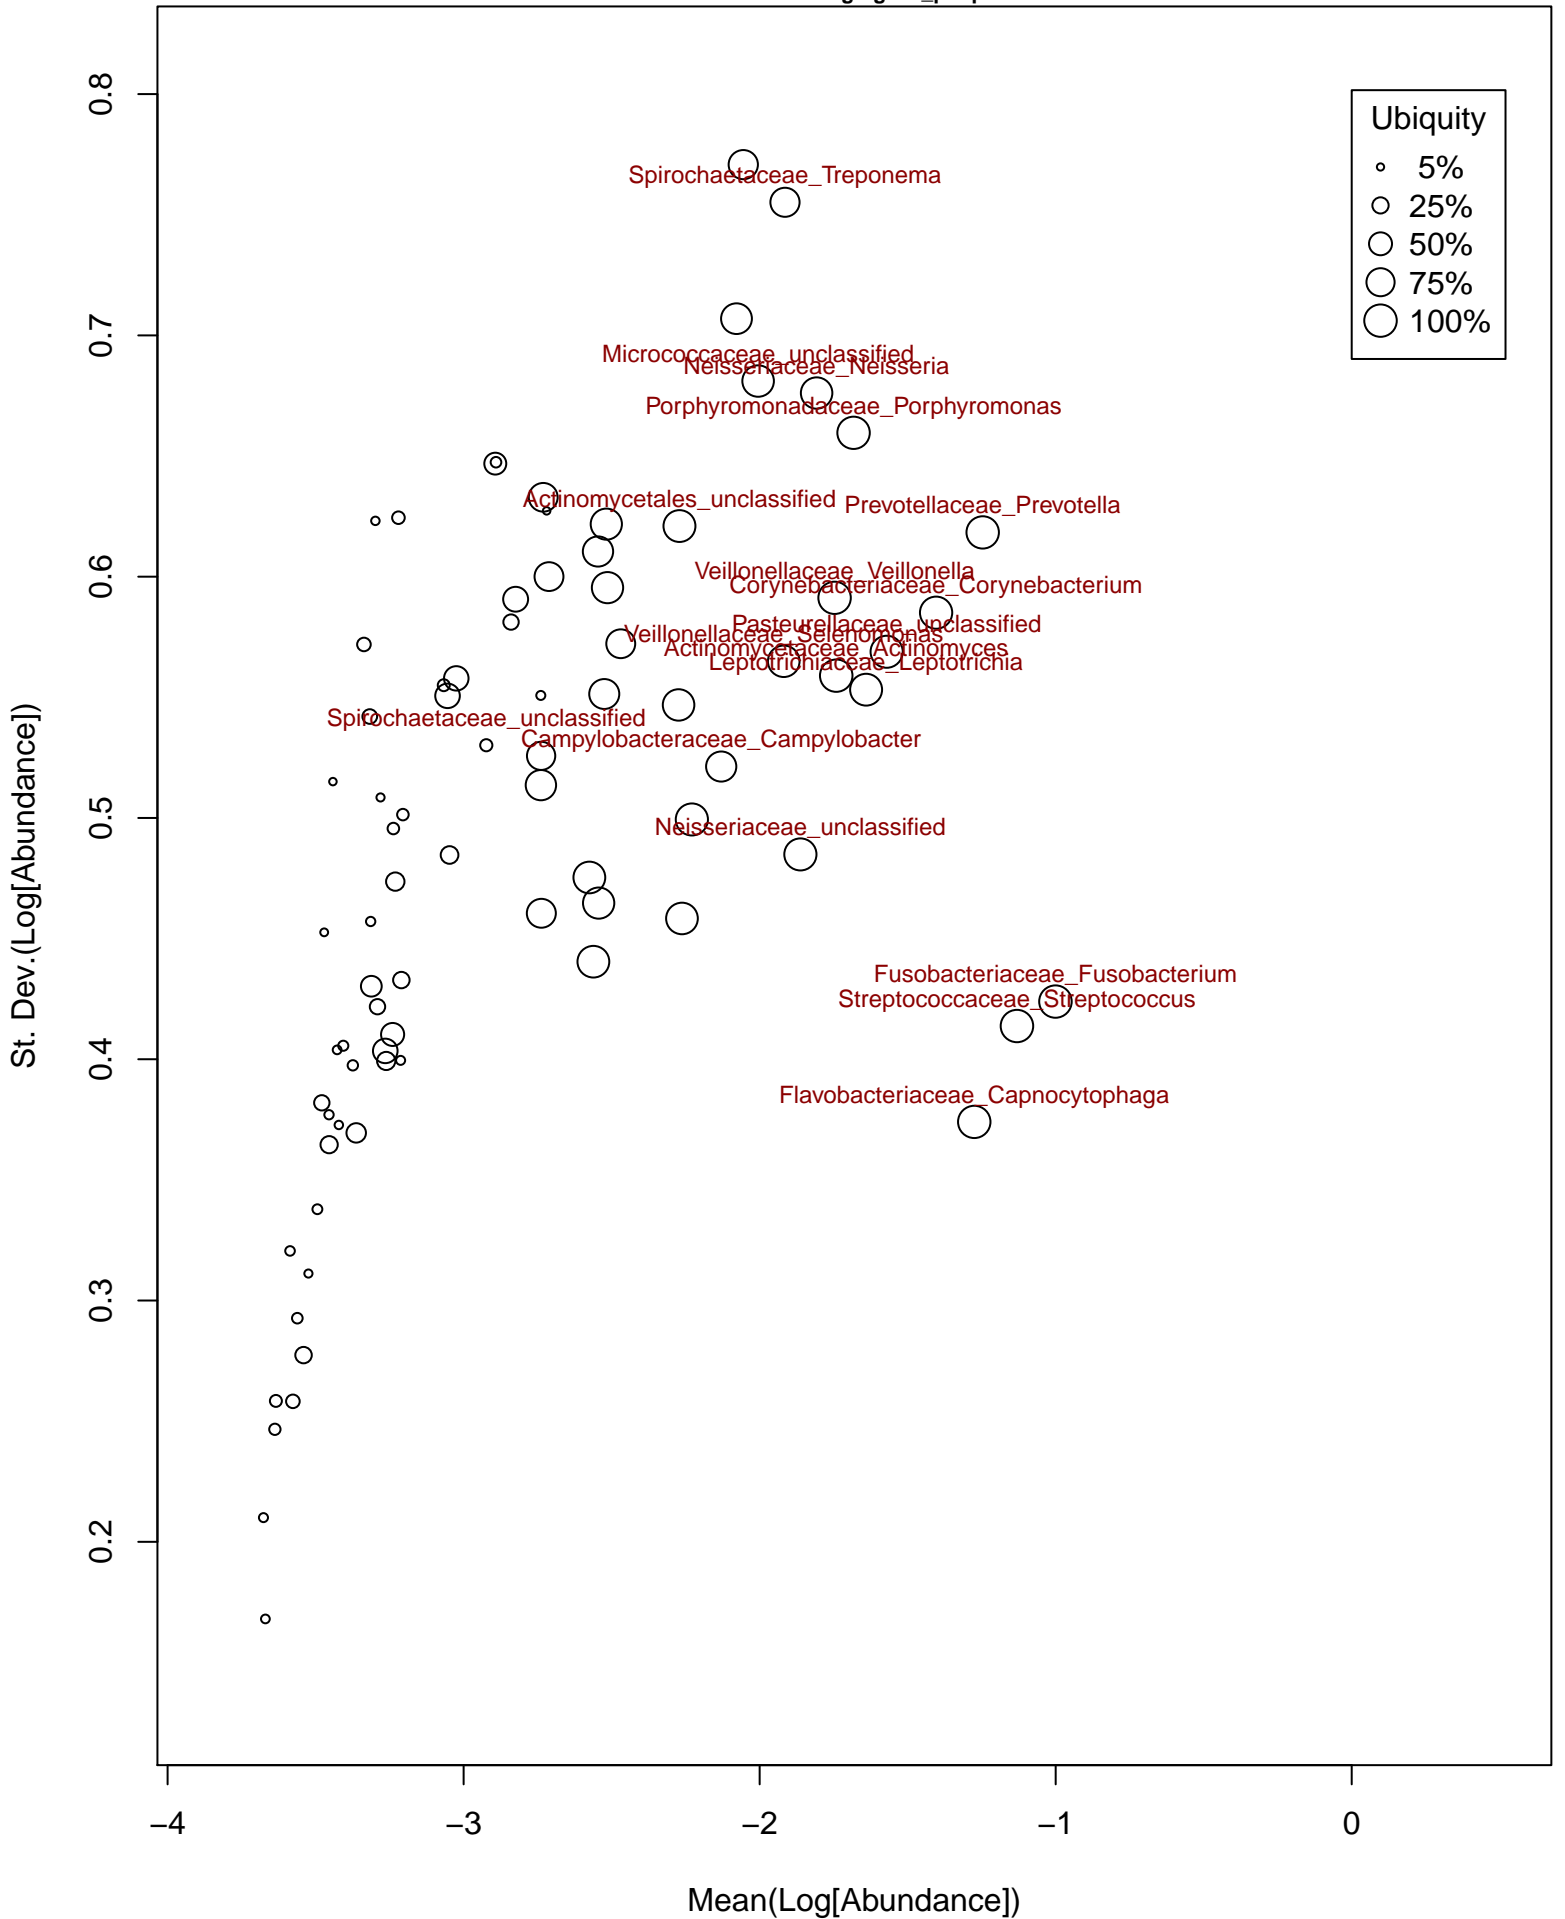

# Variation vs. Abundance

v35.Taxa.Supragingival\_plaque

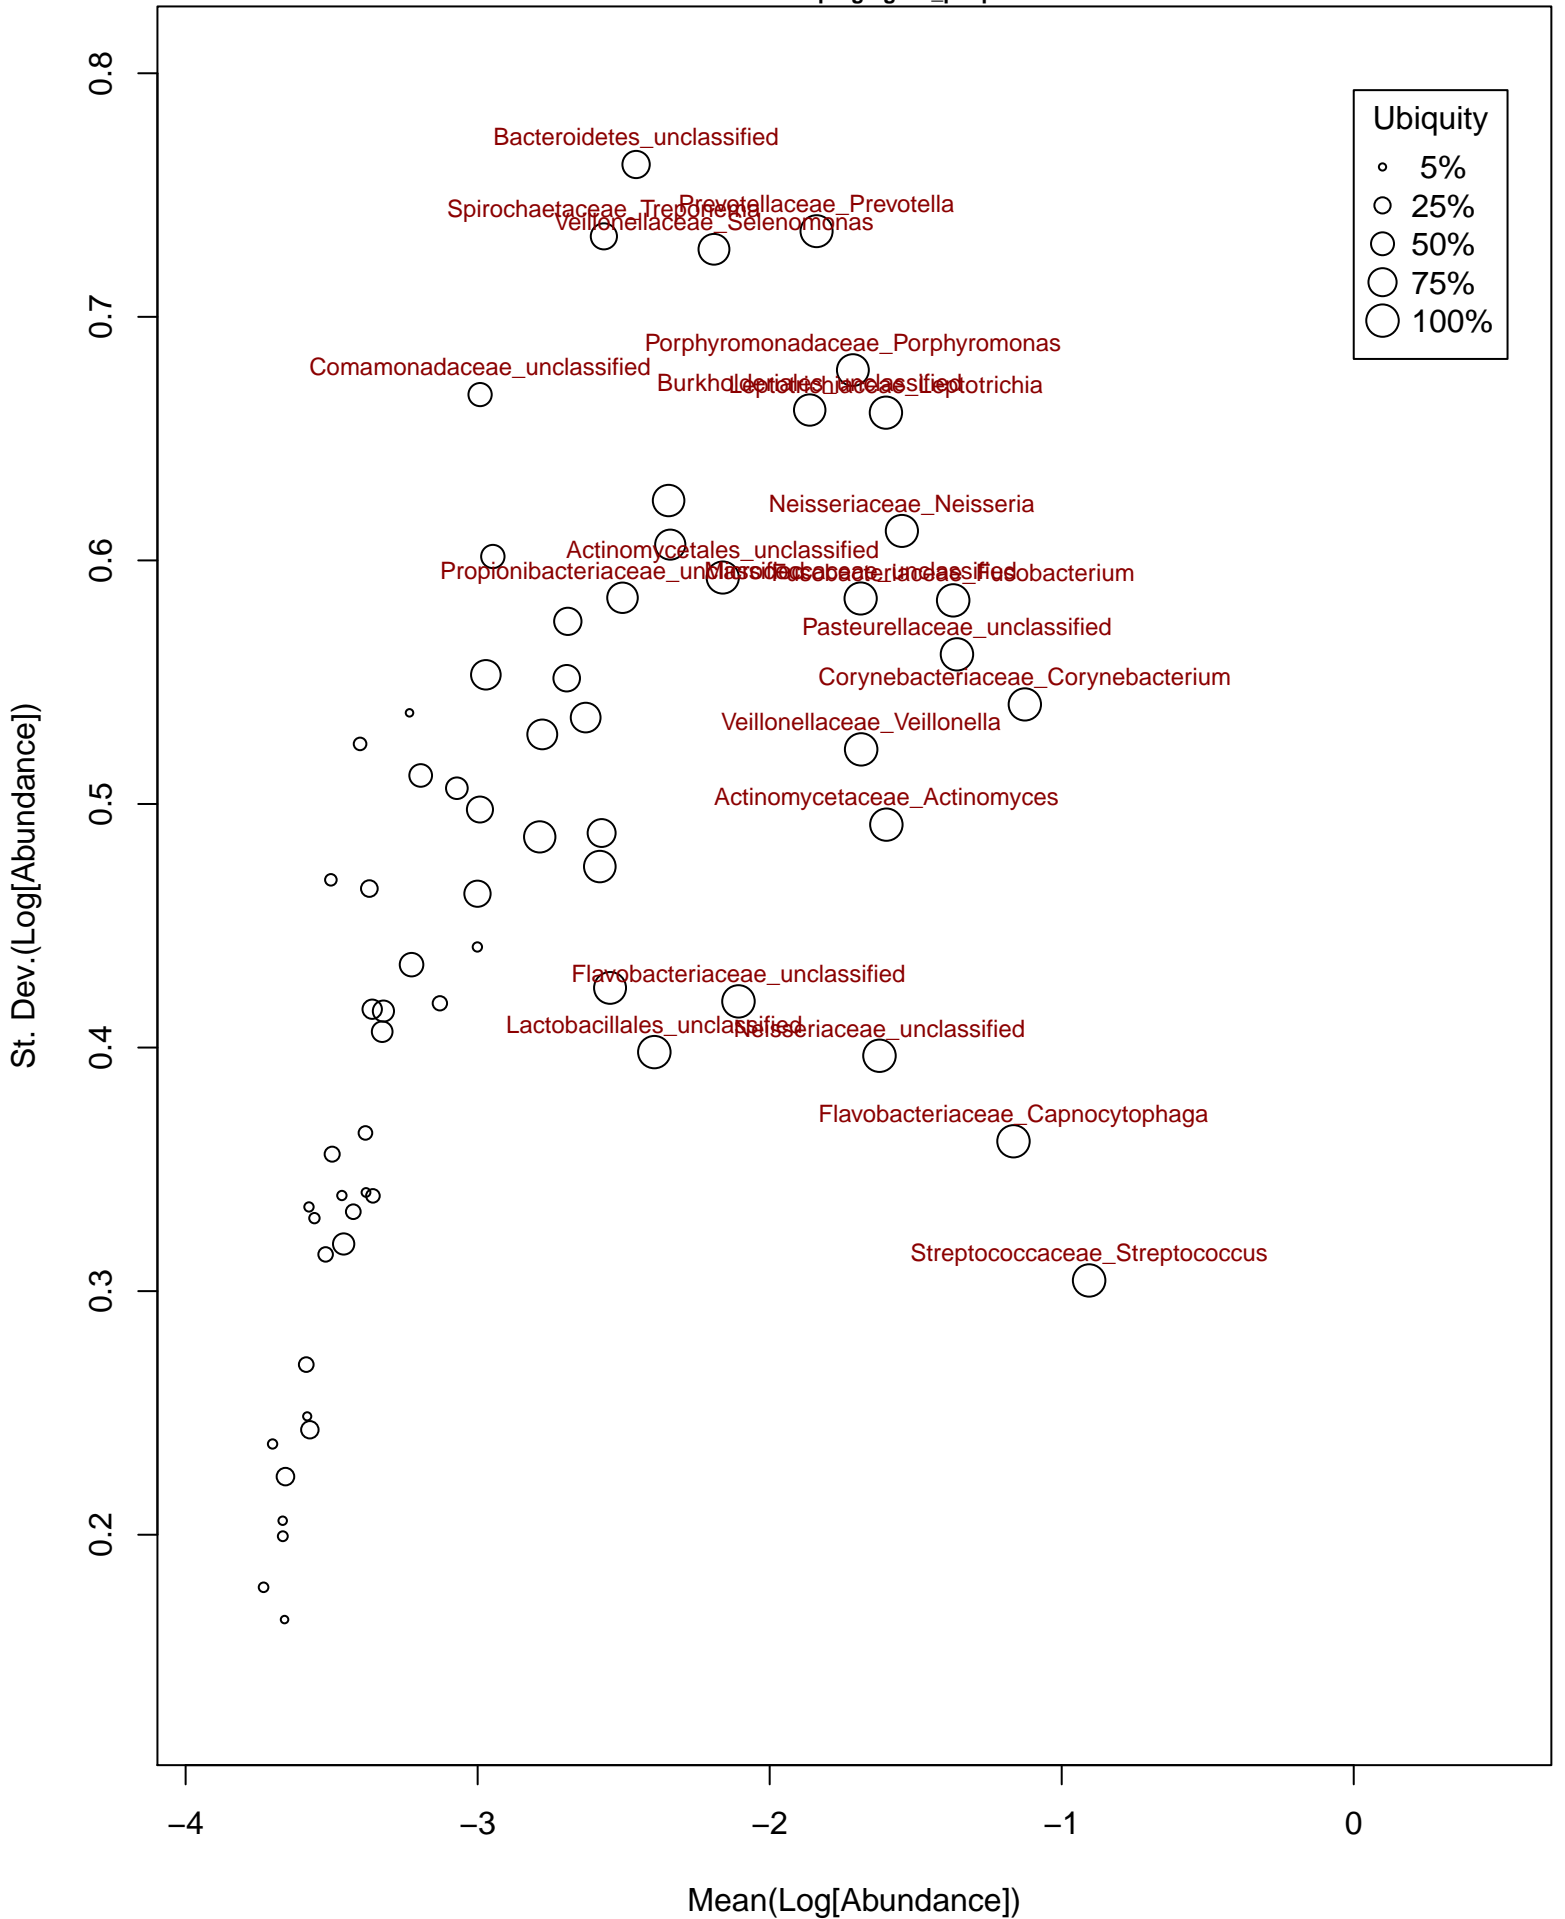

# Variation vs. Abundance

v35.Taxa.Throat

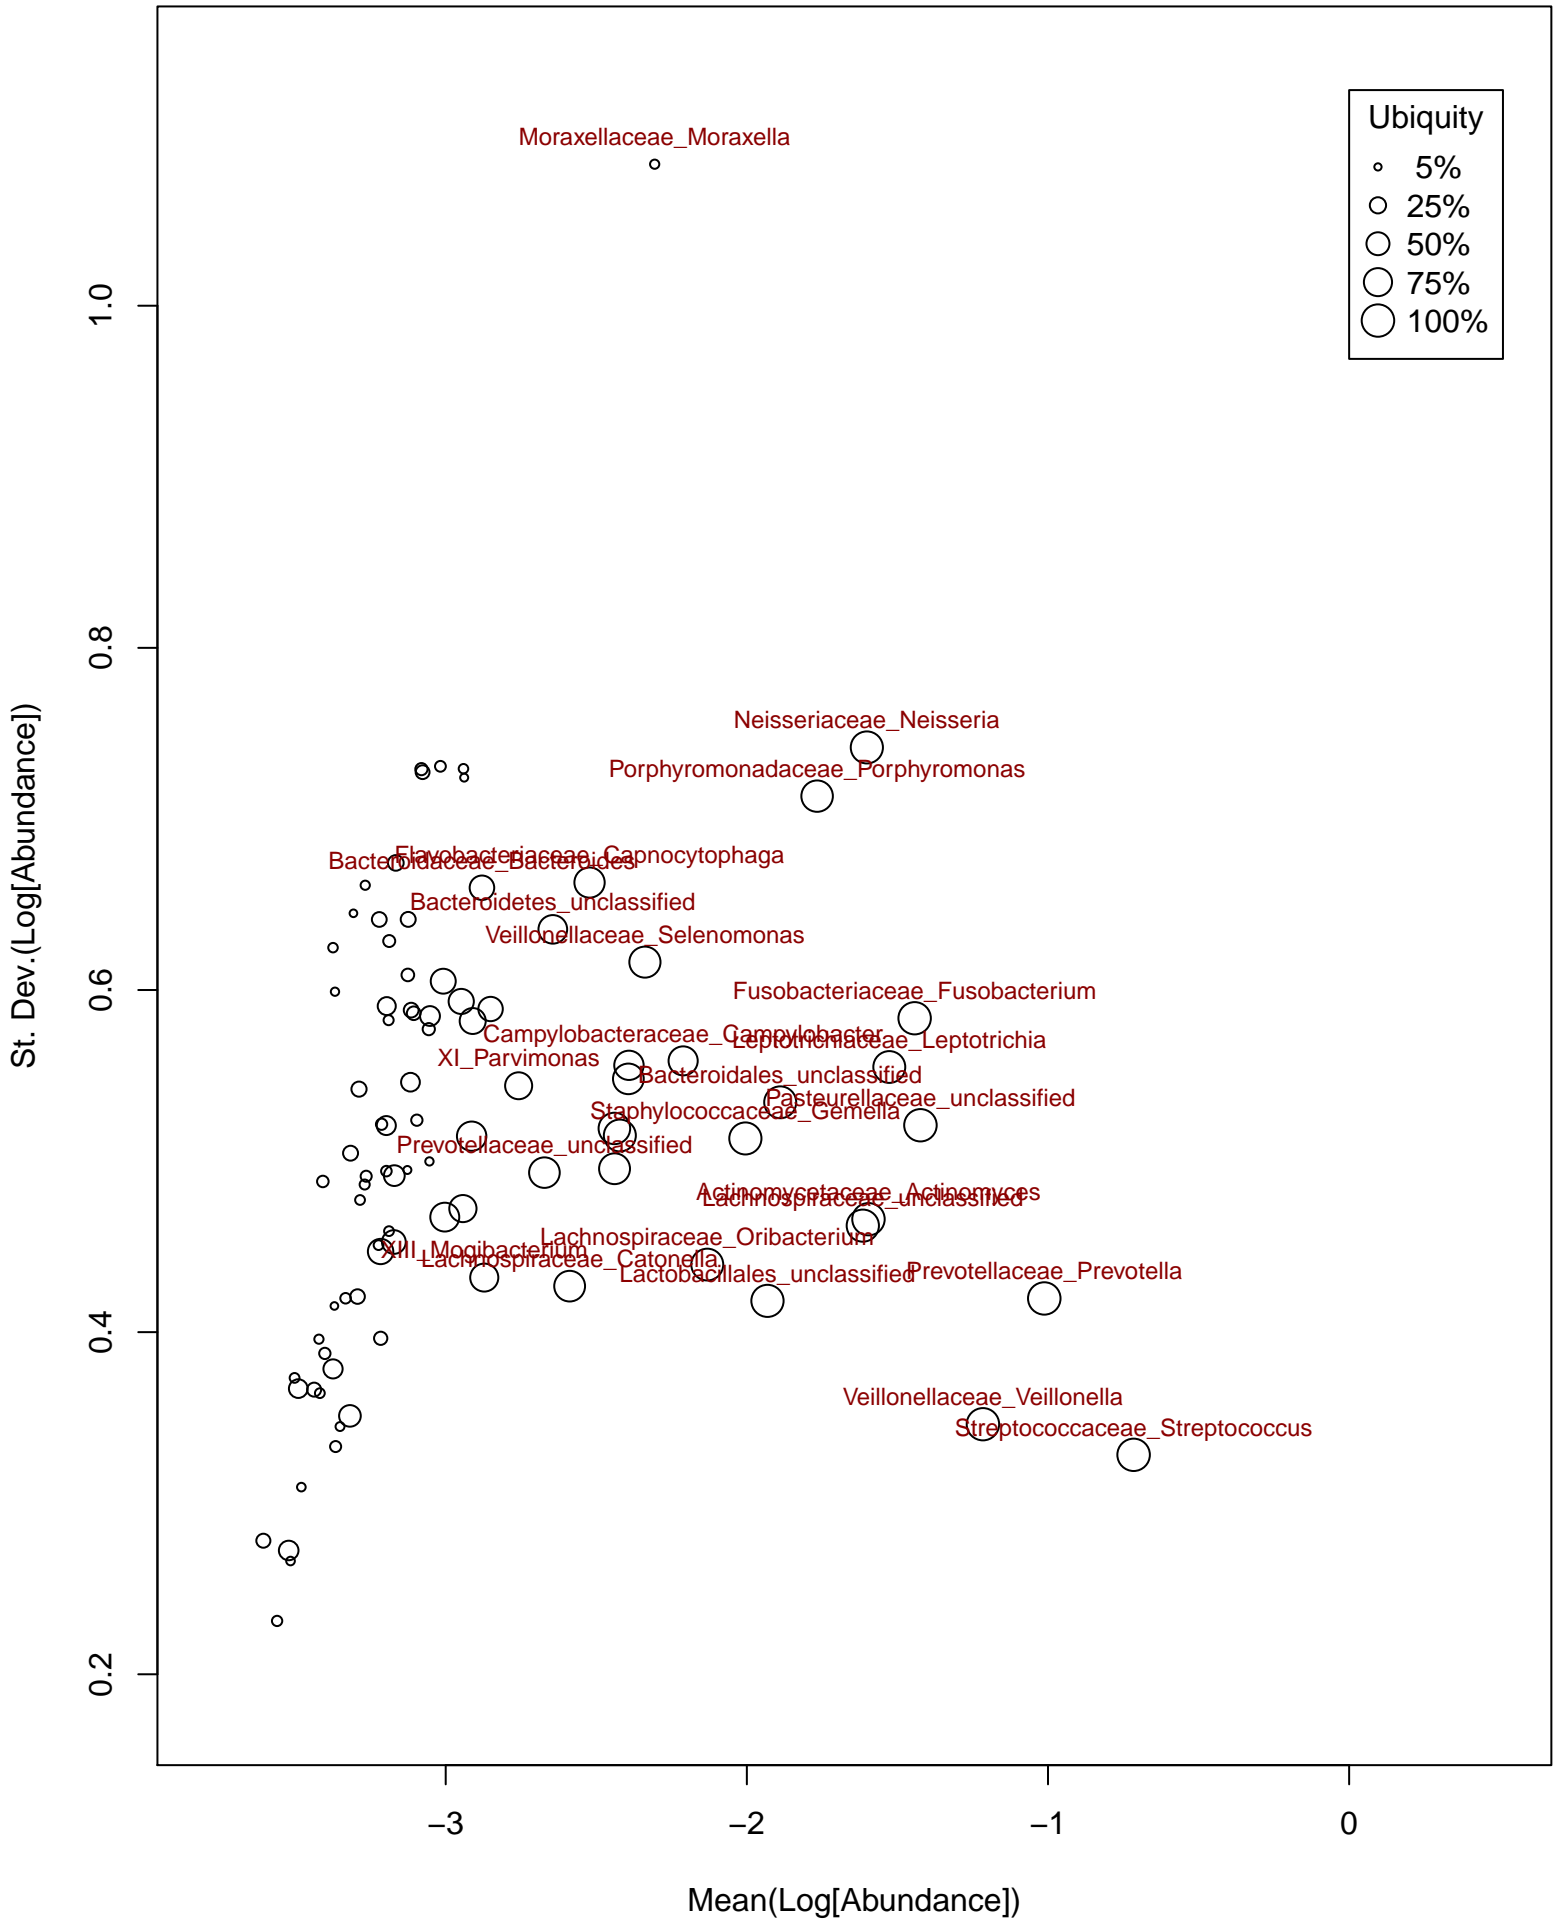



# Variation vs. Abundance

v35.Taxa.Tongue\_dorsum

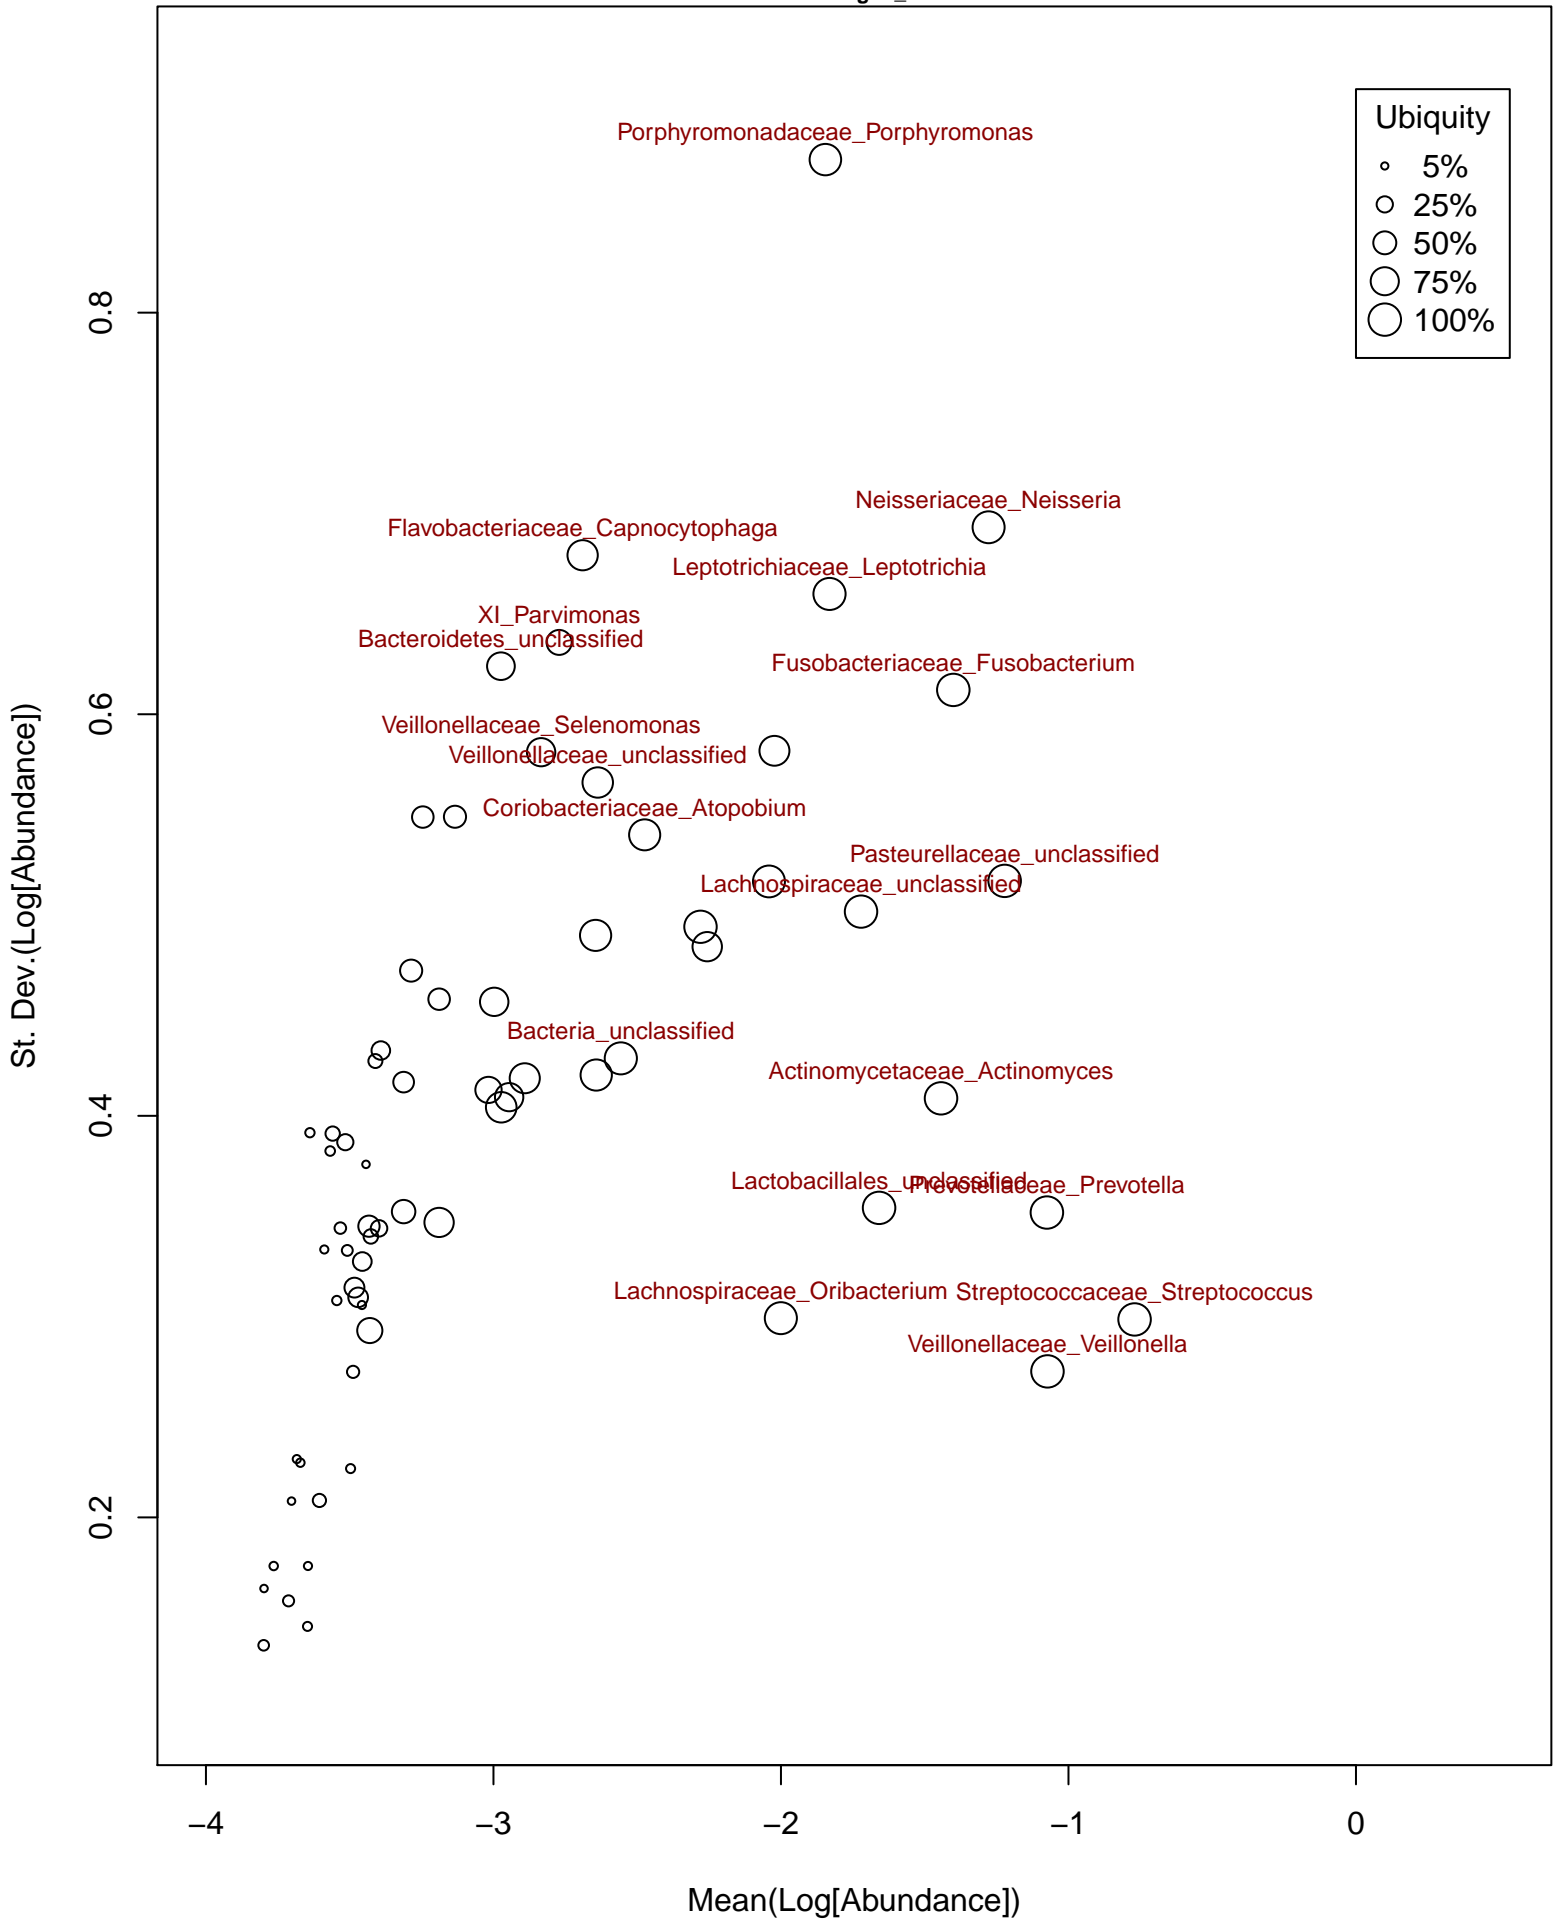

# Variation vs. Abundance

v35.Taxa.Vaginal\_introitus

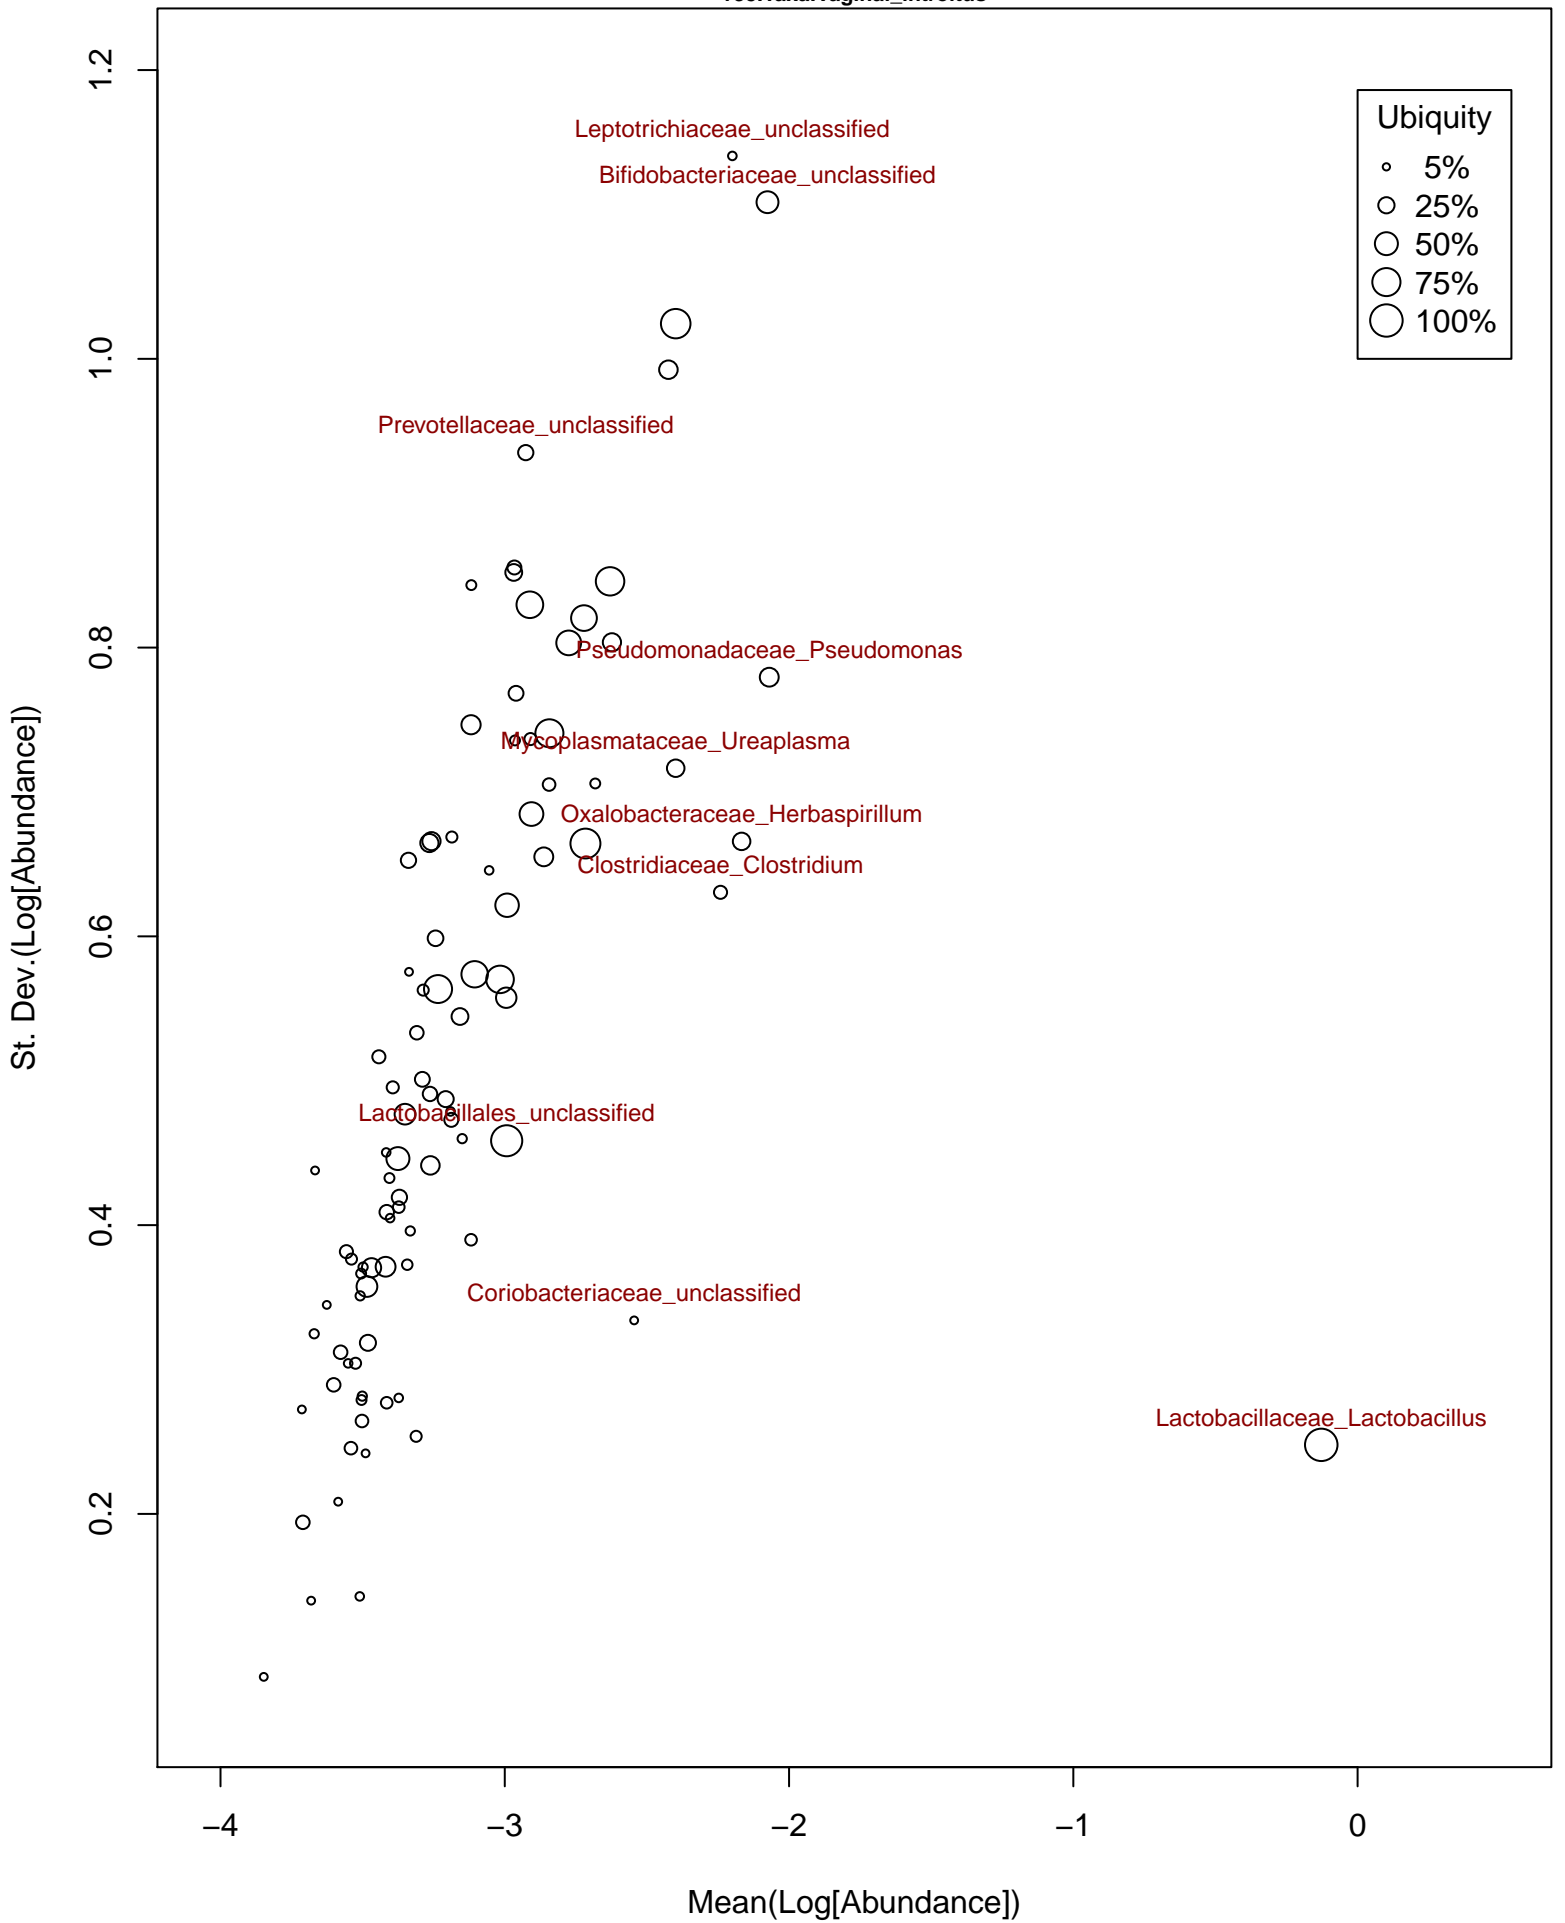

Supplement: pone.0063139.s002.pdf [file pone.0063139.s002.pdf]
